# Supplementary material for: Concerning traditional models and machine learning approaches in geochemical data processing
Source: Research Square preprint supplement (doi:10.21203/rs.3.rs-6401121/v1), 2025-05-20
Supplement: Supplementary file 1 [file 5c396a152d2e79eccc4df96a.xlsx]

## Sheet: Ridges & ref
		Warren, 2016			used in Fig. 5
		Ol	Ol	Opx	Cpx	Spl
Ridge	Location	NiO	Fo	Al2O3	Al2O3	Mg#	Ol Ref	Opx Ref	Cpx Ref	Spin Ref
DMM	DMM	0.36	89	6.46	7.87	75		Workman & Hart 2005	Workman & Hart 2005	Workman & Hart 2005
EPR	Terevaka TF	0.38	90.6966	2.43	2.7	65	Constantin et al 1995	Constantin et al 1995	Constantin et al 1995	Constantin et al 1995
EPR	Garrett TF	0.38	91.04	2.615	3.32	66	Constantin 1999	Cannat et al 1990	Constantin 1999	Constantin 1999
EPR	Garrett TF	0.4	91.07	2.57	3.41	66.26	Constantin 1999	Constantin 1999	Cannat et al 1990	Constantin 1999
EPR	Garrett TF	0.37	90.92	2.37		65.15	Constantin 1999	Constantin 1999		Constantin 1999
EPR	Hess Deep	0.33	91	2.23	2.96	68	Dick & Natland 1996	Dick & Natland 1996	Dick & Natland 1996	Dick & Natland 1996
EPR	Hess Deep	0.31	91	2.16	2.75333	64	Dick & Natland 1996	Dick & Natland 1996	Dick & Natland 1996	Dick & Natland 1996
EPR	Hess Deep	0.32	89	2.465	3.16	70	Dick & Natland 1996	Dick & Natland 1996	Dick & Natland 1996	Dick & Natland 1996
EPR	Hess Deep	0.29	91	2.18	2.82	68	Dick & Natland 1996	Dick & Natland 1996	Dick & Natland 1996	Dick & Natland 1996
EPR	Hess Deep	0.38	91	2.19	3.14	66	Dick & Natland 1996	Dick & Natland 1996	Dick & Natland 1996	Dick & Natland 1996
EPR	Hess Deep	0.38	91	2.18	2.865	69	Dick & Natland 1996	Dick & Natland 1996	Dick & Natland 1996	Dick & Natland 1996
EPR	Hess Deep	0.31	91	2.1	2.77333	61	Dick & Natland 1996	Dick & Natland 1996	Dick & Natland 1996	Dick & Natland 1996
EPR	Hess Deep	0.37	91	2.18	2.975	65	Dick & Natland 1996	Dick & Natland 1996	Dick & Natland 1996	Dick & Natland 1996
EPR	Hess Deep	0.33	91	2.08	2.885	66	Dick & Natland 1996	Dick & Natland 1996	Dick & Natland 1996	Dick & Natland 1996
EPR	Hess Deep	0.3	90		2.93	65	Dick & Natland 1996		Dick & Natland 1996	Dick & Natland 1996
EPR	Hess Deep	0.25	91		3.12	66	Arai & Matsukage 1996		Arai & Matsukage 1996	Arai & Matsukage 1996
EPR	Hess Deep	0.4	91				Arai & Matsukage 1996
EPR	Hess Deep	0.46	90	2.05	2.28	59	Arai & Matsukage 1996	Arai & Matsukage 1996	Arai & Matsukage 1996	Arai & Matsukage 1996
CIR	Marie Celeste TF	0.25	91	3.57	4.02	79	Hellebrand et al 2002b	Hellebrand et al 2002b	Hellebrand et al 2002b	Hellebrand et al 2002b
CIR	Ridge at 12S	0.39	92	3.47		76	Hellebrand et al 2002b	Hellebrand et al 2002b		Hellebrand et al 2002b
CIR	Ridge at 12S	0.38	91	4.1	5.03	75	Hellebrand et al 2002b	Hellebrand et al 2002b	Hellebrand et al 2002b	Hellebrand et al 2002b
CIR	Ridge at 12S	0.4	92	2.87	3.81	80	Hellebrand et al 2002b	Hellebrand et al 2002b	Hellebrand et al 2002b	Hellebrand et al 2002b
CIR	Argo TF	0.38	91	4.59	5.56	81	Hellebrand et al 2002b	Hellebrand et al 2002b	Hellebrand et al 2002b	Hellebrand et al 2002b
CIR	Argo TF	0.29	91	4.74	5.4	80	Hellebrand et al 2002b	Hellebrand et al 2002b	Hellebrand et al 2002b	Hellebrand et al 2002b
CIR	Argo TF	0.26	91	4.49	5.54	78	Hellebrand et al 2002b	Hellebrand et al 2002b	Hellebrand et al 2002b	Hellebrand et al 2002b
CIR	Vema II TF	0.39	91	3.97	4.57	76	Hellebrand et al 2002b	Hellebrand et al 2002b	Hellebrand et al 2002b	Bryndzia & Wood 1990
CIR	Vema II TF	0.39	92	4.05	4.32	76	Hellebrand et al 2002b	Hellebrand et al 2002b	Hellebrand et al 2002b	Hellebrand et al 2002b
CIR	Vema II TF	0.38	91	4.26	5.37	70	Hellebrand et al 2002b	Hellebrand et al 2002b	Hellebrand et al 2002b	Hellebrand et al 2002b
CIR	Owen TF	0.32	90	5.16		59	Hamlyn & Bonatti 1980	Hamlyn & Bonatti 1980		Hamlyn & Bonatti 1980
CIR	Owen TF	0.44	90	5.3	6.39	72	Hamlyn & Bonatti 1980	Hamlyn & Bonatti 1980	Hamlyn & Bonatti 1980	Hamlyn & Bonatti 1980
CIR	Owen TF	0.35	90	4.97		79	Hamlyn & Bonatti 1980	Hamlyn & Bonatti 1980		Hamlyn & Bonatti 1980
CIR	Owen TF	0.45	89	5.02	4.65	72	Hamlyn & Bonatti 1980	Hamlyn & Bonatti 1980	Hamlyn & Bonatti 1980	Hamlyn & Bonatti 1980
CIR	Owen TF	0.5	89	4.82	6.35	73	Hamlyn & Bonatti 1980	Hamlyn & Bonatti 1980	Hamlyn & Bonatti 1980	Hamlyn & Bonatti 1980
CIR	Owen TF	0.52	89	4.25	6.34	70	Hamlyn & Bonatti 1980	Hamlyn & Bonatti 1980	Hamlyn & Bonatti 1980	Hamlyn & Bonatti 1980
MAR	Ridge at 43N	0.24	91	2.4	2.67	67	Shibata & Thompson 1986	Shibata & Thompson 1986	Shibata & Thompson 1986	Shibata & Thompson 1986
MAR	Ridge at 43N	0.36	91	2.45	2.8	67	Shibata & Thompson 1986	Shibata & Thompson 1986	Shibata & Thompson 1986	Shibata & Thompson 1986
MAR	Ridge at 43N	0.43	92	2.13	2.34	66	Shibata & Thompson 1986	Shibata & Thompson 1986	Shibata & Thompson 1986	Shibata & Thompson 1986
MAR	Ridge at 43N	0.44	92	2.42	2.11	63	Shibata & Thompson 1986	Shibata & Thompson 1986	Shibata & Thompson 1986	Shibata & Thompson 1986
MAR	Ridge at 43N	0.39	91	2.64	2.23	63	Shibata & Thompson 1986	Shibata & Thompson 1986	Shibata & Thompson 1986	Shibata & Thompson 1986
MAR	Kane TF	0.39	90	5.34	7.02	76	Ghose et al 1996	Ghose et al 1996	Ghose et al 1996	Ghose et al 1996
MAR	Kane TF	0.37	90	5.33	6.25	78	Ghose et al 1996	Ghose et al 1996	Ghose et al 1996	Ghose et al 1996
MAR	Kane TF	0.38	90	3.96	5.7	74	Ghose et al 1996	Ghose et al 1996	Ghose et al 1996	Ghose et al 1996
MAR	Kane TF	0.39	91	4.62	6.12	76	Ghose et al 1996	Ghose et al 1996	Ghose et al 1996	Ghose et al 1996
MAR	Kane TF	0.38	90	4.7	6.85	78	Ghose et al 1996	Ghose et al 1996	Ghose et al 1996	Ghose et al 1996
MAR	Kane MARK	0.37	91	3.45	4.28	66	Ghose et al 1996	Ghose et al 1996	Ghose et al 1996	Ghose et al 1996
MAR	Kane MARK	0.4	91	3.62	3.83	68	Ghose et al 1996	Ghose et al 1996	Ghose et al 1996	Ghose et al 1996
MAR	Kane MARK	0.4	91	3.86		72	Juteau et al 1990	Juteau et al 1990		Juteau et al 1990
MAR	Kane MARK	0.38	91	4.01		73	Juteau et al 1990	Juteau et al 1990		Juteau et al 1990
MAR	Kane MARK	0.4	91	3.87		84	Juteau et al 1990	Juteau et al 1990		Juteau et al 1990
MAR	Kane MARK	0.38	91	4.93		75	Juteau et al 1990	Juteau et al 1990		Juteau et al 1990
MAR	Kane MARK	0.3	91	3.59		71	Komor et al 1990	Komor et al 1990		Komor et al 1990
MAR	Kane MARK	0.3	90	4.46	5.53	74	Komor et al 1990	Komor et al 1990	Komor et al 1990	Komor et al 1990
MAR	Kane MARK	0.3	90	4.79		74	Komor et al 1990	Komor et al 1990		Komor et al 1990
MAR	Kane MARK	0.31	91	4.23	4.74	73	Komor et al 1990	Komor et al 1990	Komor et al 1990	Komor et al 1990
MAR	Kane MARK	0.31	91	4.09	5.07		Komor et al 1990	Komor et al 1990	Komor et al 1990
MAR	Kane MARK	0.31	91	4.75	5.4	73	Komor et al 1990	Komor et al 1990	Komor et al 1990	Komor et al 1990
MAR	Kane MARK	0.32	91	4.25	5.8	74	Komor et al 1990	Komor et al 1990	Komor et al 1990	Komor et al 1990
MAR	Kane MARK	0.31	90	3.7	5.23	74	Komor et al 1990	Komor et al 1990	Komor et al 1990	Komor et al 1990
MAR	Kane MARK	0.32	91	4.09	5.24	74	Komor et al 1990	Komor et al 1990	Komor et al 1990	Komor et al 1990
MAR	Kane MARK	0.32	91	4.5	5.4	73	Komor et al 1990	Komor et al 1990	Komor et al 1990	Komor et al 1990
MAR	Kane MARK	0.33	91	4.39	5.39	75	Komor et al 1990	Komor et al 1990	Komor et al 1990	Komor et al 1990
MAR	Kane MARK	0.34	90	4.34	5.45	73	Komor et al 1990	Komor et al 1990	Komor et al 1990	Komor et al 1990
MAR	Kane MARK	0.31	91	4.35	5.5	74	Komor et al 1990	Komor et al 1990	Komor et al 1990	Komor et al 1990
MAR	Kane MARK	0.33	91	4.45			Komor et al 1990	Komor et al 1990
MAR	Kane MARK	0.32	90	3.76	4.96		Komor et al 1990	Komor et al 1990	Komor et al 1990
MAR	Kane MARK	0.42	91	3.79	4.65	71	Ross & Elthon 1997	Ross & Elthon 1997	Ross & Elthon 1997	Ross & Elthon 1997
MAR	Kane MARK	0.41	90	3.98	4.97		Ross & Elthon 1997	Ross & Elthon 1997	Ross & Elthon 1997
MAR	Kane MARK	0.4	91	4.38	4.96	71	Ross & Elthon 1997	Ross & Elthon 1997	Ross & Elthon 1997	Ross & Elthon 1997
MAR	Kane MARK	0.42	91	4	4.29		Ross & Elthon 1997	Ross & Elthon 1997	Ross & Elthon 1997
MAR	Kane MARK	0.41	90	4.59		72	Ross & Elthon 1997	Ross & Elthon 1997		Ross & Elthon 1997
MAR	Kane MARK	0.41	91	4.22	4.94	72	Ross & Elthon 1997	Ross & Elthon 1997	Ross & Elthon 1997	Ross & Elthon 1997
MAR	Kane MARK	0.39	91	4.32	5.17	71	Ross & Elthon 1997	Ross & Elthon 1997	Ross & Elthon 1997	Ross & Elthon 1997
MAR	Kane MARK	0.38	91	3.79	4.84	73	Stephens 1997	Stephens 1997	Stephens 1997	Stephens 1997
MAR	Kane MARK	0.39	91	4.37	3.72	71	Stephens 1997	Stephens 1997	Stephens 1997	Stephens 1997
MAR	Kane MARK	0.38	91	4.23		73	Stephens 1997	Stephens 1997		Stephens 1997
MAR	Kane MARK	0.39	91	4.18		73	Stephens 1997	Stephens 1997		Stephens 1997
MAR	Kane MARK	0.38	90	4.27	4.82	73	Stephens 1997	Stephens 1997	Stephens 1997	Stephens 1997
MAR	Kane MARK	0.37	91	4.78	4.87	67	Stephens 1997	Stephens 1997	Stephens 1997	Stephens 1997
MAR	Kane MARK	0.38	91	4.19	4.41	72	Stephens 1997	Stephens 1997	Stephens 1997	Stephens 1997
MAR	Kane MARK	0.38	91	4.74	4.91	72	Stephens 1997	Stephens 1997	Stephens 1997	Stephens 1997
MAR	Kane MARK	0.36	91	4.63	4.69	72	Stephens 1997	Stephens 1997	Stephens 1997	Stephens 1997
MAR	Kane MARK	0.38	91	3.83	4.43	69	Stephens 1997	Stephens 1997	Stephens 1997	Stephens 1997
MAR	Kane MARK	0.37	91	3.91	4.72	69	Stephens 1997	Stephens 1997	Stephens 1997	Stephens 1997
MAR	Kane MARK	0.41	90	4.09	4.76	71	Ghose et al 1996	Ghose et al 1996	Ghose et al 1996	Ghose et al 1996
MAR	Kane MARK	0.39	90	4.23	5.14	74	Ghose et al 1996	Ghose et al 1996	Ghose et al 1996	Ghose et al 1996
MAR	Kane MARK	0.38	91	4.42	5.15	75	Ghose et al 1996	Ghose et al 1996	Ghose et al 1996	Ghose et al 1996
MAR	Kane MARK	0.37	91	3.74	5.01	73	Niida 1997	Niida 1997	Niida 1997	Niida 1997
MAR	Kane MARK	0.37	91	3.84	4.73	73	Niida 1997	Niida 1997	Niida 1997	Niida 1997
MAR	Kane MARK	0.35	91	3.8	4.72	72	Niida 1997	Niida 1997	Niida 1997	Niida 1997
MAR	Kane MARK	0.34	91	3.75	4.69	73	Niida 1997	Niida 1997	Niida 1997	Niida 1997
MAR	Kane MARK	0.34	91	3.97	4.84	72	Niida 1997	Niida 1997	Niida 1997	Niida 1997
MAR	Kane MARK	0.34	91	4.06	5.17	72	Niida 1997	Niida 1997	Niida 1997	Niida 1997
MAR	Kane MARK	0.37	91	2.9	4.45	63	Niida 1997	Niida 1997	Niida 1997	Niida 1997
MAR	Kane MARK	0.42	90	4.2	5.21		Ross & Elthon 1997	Ross & Elthon 1997	Ross & Elthon 1997
MAR	Kane MARK	0.41	90	4.32	4.9		Ross & Elthon 1997	Ross & Elthon 1997	Ross & Elthon 1997
MAR	Kane MARK	0.41	90	3.97	5.05	71	Ross & Elthon 1997	Ross & Elthon 1997	Ross & Elthon 1997	Ross & Elthon 1997
MAR	Kane MARK	0.4	90	4.16	4.36	72	Ross & Elthon 1997	Ross & Elthon 1997	Ross & Elthon 1997	Ross & Elthon 1997
MAR	Kane MARK	0.41	91			71	Ross & Elthon 1997			Ross & Elthon 1997
MAR	Kane MARK		92	3.955	5.09	71		Ross & Elthon 1997	Ross & Elthon 1997	Ross & Elthon 1997
MAR	Kane MARK	0.41	91			71	Ross & Elthon 1997			Ross & Elthon 1997
MAR	Kane MARK	0.42	90	3.68	5.01		Ross & Elthon 1997	Ross & Elthon 1997	Ross & Elthon 1997
MAR	Kane MARK	0.41	91	4.01	5.04	72	Ross & Elthon 1997	Ross & Elthon 1997	Ross & Elthon 1997	Ross & Elthon 1997
MAR	Kane MARK	0.41	91	3.94	4.91	71	Ross & Elthon 1997	Ross & Elthon 1997	Ross & Elthon 1997	Ross & Elthon 1997
MAR	Kane MARK	0.42	91	4.155	5.005	72	Ross & Elthon 1997	Ross & Elthon 1997	Ross & Elthon 1997	Ross & Elthon 1997
MAR	Kane MARK	0.41	91	4.21	4.89	72	Ross & Elthon 1997	Ross & Elthon 1997	Ross & Elthon 1997	Ross & Elthon 1997
MAR	Kane MARK	0.41	91	4.44	5.27		Ross & Elthon 1997	Ross & Elthon 1997	Ross & Elthon 1997
MAR	Kane MARK	0.42	91	4.35	5.05	71	Ross & Elthon 1997	Ross & Elthon 1997	Ross & Elthon 1997	Ross & Elthon 1997
MAR	Kane MARK	0.42	91	4.05	4.84		Ross & Elthon 1997	Ross & Elthon 1997	Ross & Elthon 1997
MAR	Kane MARK	0.41	91	3.98	5.6	71	Ross & Elthon 1997	Ross & Elthon 1997	Ross & Elthon 1997	Ross & Elthon 1997
MAR	Kane MARK	0.41	91	4	5.4	70	Ross & Elthon 1997	Ross & Elthon 1997	Ross & Elthon 1997	Ross & Elthon 1997
MAR	Kane MARK	0.37	90	3.98	4.9	70	Stephens 1997	Stephens 1997	Stephens 1997	Stephens 1997
MAR	Kane MARK	0.38	91	4.33	5.35	72	Stephens 1997	Stephens 1997	Stephens 1997	Stephens 1997
MAR	Kane MARK	0.38	91	4.2	4.63	73	Stephens 1997	Stephens 1997	Stephens 1997	Stephens 1997
MAR	Kane MARK	0.4	91	3.85	4.5	71	Stephens 1997	Stephens 1997	Stephens 1997	Stephens 1997
MAR	Kane MARK	0.37	91	4.13	4.73	71	Stephens 1997	Stephens 1997	Stephens 1997	Stephens 1997
MAR	Kane MARK	0.39	91	4.01	3.97	69	Stephens 1997	Stephens 1997	Stephens 1997	Stephens 1997
MAR	Kane MARK	0.35	91	1.94	4.6	73	Stephens 1997	Stephens 1997	Stephens 1997	Stephens 1997
MAR	Kane MARK	0.37	90	3.87	4.83	70	Stephens 1997	Stephens 1997	Stephens 1997	Stephens 1997
MAR	Kane MARK	0.37	91	4.08	4.77	71	Stephens 1997	Stephens 1997	Stephens 1997	Stephens 1997
MAR	Kane MARK	0.38	91	4.29	4.69	72	Stephens 1997	Stephens 1997	Stephens 1997	Stephens 1997
MAR	Kane MARK	0.38	90	3.76	4.69	70	Stephens 1997	Stephens 1997	Stephens 1997	Stephens 1997
MAR	Kane MARK	0.44	91	4.45	4.93	68	Stephens 1997	Stephens 1997	Stephens 1997	Stephens 1997
MAR	Kane MARK	0.38	91	3.88	4.5	73	Stephens 1997	Stephens 1997	Stephens 1997	Stephens 1997
MAR	Kane MARK	0.38	91	4.14	4.89	72	Stephens 1997	Stephens 1997	Stephens 1997	Stephens 1997
MAR	Kane MARK	0.39	91	4.96	5.24	72	Stephens 1997	Stephens 1997	Stephens 1997	Stephens 1997
MAR	Kane MARK	0.39	91	4.27	5.02	71	Stephens 1997	Stephens 1997	Stephens 1997	Stephens 1997
MAR	Kane MARK	0.38	91	4.09	4.47	72	Stephens 1997	Stephens 1997	Stephens 1997	Stephens 1997
MAR	Kane MARK	0.38	91	4.08	4.67	72	Stephens 1997	Stephens 1997	Stephens 1997	Stephens 1997
MAR	Kane MARK	0.4	91	4.09	4.89	71	Stephens 1997	Stephens 1997	Stephens 1997	Stephens 1997
MAR	Kane MARK	0.38	91	4.08	4.59	71	Stephens 1997	Stephens 1997	Stephens 1997	Stephens 1997
MAR	Kane MARK	0.38	90	4.24	4.9	72	Ghose et al 1996	Ghose et al 1996	Ghose et al 1996	Ghose et al 1996
MAR	Kane MARK	0.4	91	4.08	4.78	70	Ghose et al 1996	Ghose et al 1996	Ghose et al 1996	Ghose et al 1996
MAR	Kane MARK	0.4	91	4.18	4.89	71	Ghose et al 1996	Ghose et al 1996	Ghose et al 1996	Ghose et al 1996
MAR	Kane MARK	0.37	90	4.31	5.01	71	Ghose et al 1996	Ghose et al 1996	Ghose et al 1996	Ghose et al 1996
MAR	Kane MARK	0.36	91	4.14	4.47	71	Ghose et al 1996	Ghose et al 1996	Ghose et al 1996	Ghose et al 1996
MAR	Kane MARK	0.37	91	3.96		70	Ghose et al 1996	Ghose et al 1996		Ghose et al 1996
MAR	Kane MARK	0.39	91	3.58	4.62	71	Ghose et al 1996	Ghose et al 1996	Ghose et al 1996	Ghose et al 1996
MAR	Kane MARK	0.4	91	3.44	4.1	69	Ghose et al 1996	Ghose et al 1996	Ghose et al 1996	Ghose et al 1996
MAR	Kane Megamullion	0.34	88	2.8			Ghose et al 1996	Ghose et al 1996
MAR	Kane Megamullion	0.336433	91	3.73056	3.62125	70	Dick et al 2010	Dick et al 2010	Dick et al 2010	Dick et al 2010
MAR	Kane Megamullion	0.330333	90	4.03836	4.2625	69	Dick et al 2010	Dick et al 2010	Dick et al 2010	Dick et al 2010
MAR	Kane Megamullion	0.365367	91	3.78461		61	Dick et al 2010	Dick et al 2010		Dick et al 2010
MAR	Kane Megamullion	0.38496	90	3.50974	5.0285	70	Dick et al 2010	Dick et al 2010	Dick et al 2010	Dick et al 2010
MAR	Kane Megamullion	0.357133	91	3.8905	5.772	72	Dick et al 2010	Dick et al 2010	Dick et al 2010	Dick et al 2010
MAR	Kane Megamullion	0.355967	91			64	Dick et al 2010			Dick et al 2010
MAR	Ridge at 17N	0.4	92	3.03	3.75	69	Cannat et al 1992	Cannat et al 1992	Cannat et al 1992	Cannat et al 1992
MAR	Fifteen-Twenty TF	0.37	91	2.33	3.42	71	Cannat et al 1992	Cannat et al 1992	Cannat et al 1992	Cannat et al 1992
MAR	Fifteen-Twenty TF	0.42	92		3.23	69	Cannat et al 1992		Cannat et al 1992	Cannat et al 1992
MAR	Fifteen-Twenty TF	0.37	91	2.65	2.95	68	Seyler et al 2007	Seyler et al 2007	Seyler et al 2007	Seyler et al 2007
MAR	Fifteen-Twenty TF	0.4	91	3.27	2.63	71	Seyler et al 2007	Seyler et al 2007	Seyler et al 2007	Seyler et al 2007
MAR	Fifteen-Twenty TF	0.39	91	2.69333	2.94	68	Seyler et al 2007	Seyler et al 2007	Seyler et al 2007	Seyler et al 2007
MAR	Fifteen-Twenty TF	0.38	91	2.53	3.06429	66	Seyler et al 2007	Seyler et al 2007	Seyler et al 2007	Seyler et al 2007
MAR	Fifteen-Twenty TF	0.39	91	3.195	3.4	69	Seyler et al 2007	Seyler et al 2007	Seyler et al 2007	Seyler et al 2007
MAR	Fifteen-Twenty TF	0.37	91	2.96	2.955		Seyler et al 2007	Seyler et al 2007	Seyler et al 2007
MAR	Fifteen-Twenty TF	0.42	91	2.63667	3.255	64	Seyler et al 2007	Seyler et al 2007	Seyler et al 2007	Seyler et al 2007
MAR	Fifteen-Twenty TF	0.39	91	2.52	3.12	65	Seyler et al 2007	Seyler et al 2007	Seyler et al 2007	Seyler et al 2007
MAR	Fifteen-Twenty TF	0.43	91	2.715	3.08	64	Seyler et al 2007	Seyler et al 2007	Seyler et al 2007	Seyler et al 2007
MAR	Fifteen-Twenty TF	0.4	91	2.805	3.015	67	Seyler et al 2007	Seyler et al 2007	Seyler et al 2007	Seyler et al 2007
MAR	Fifteen-Twenty TF	0.37	91	2.61	3.05	65	Seyler et al 2007	Seyler et al 2007	Seyler et al 2007	Seyler et al 2007
MAR	Fifteen-Twenty TF	0.39	91	3.06	3.56	66	Seyler et al 2007	Seyler et al 2007	Seyler et al 2007	Seyler et al 2007
MAR	Fifteen-Twenty TF	0.35	92	2.54	3.01	68	Seyler et al 2007	Seyler et al 2007	Seyler et al 2007	Seyler et al 2007
MAR	Fifteen-Twenty TF	0.39	91		3.26	66	Seyler et al 2007		Seyler et al 2007	Seyler et al 2007
MAR	Fifteen-Twenty TF	0.43	91	2.235	2.58	67	Seyler et al 2007	Seyler et al 2007	Seyler et al 2007	Seyler et al 2007
MAR	Fifteen-Twenty TF	0.38	91	2.545	3.32	68	Seyler et al 2007	Seyler et al 2007	Seyler et al 2007	Seyler et al 2007
MAR	Fifteen-Twenty TF	0.41	91	2.9	3.12333	64	Seyler et al 2007	Seyler et al 2007	Seyler et al 2007	Seyler et al 2007
MAR	Fifteen-Twenty TF	0.39	91	2.675	3.33	67	Seyler et al 2007	Seyler et al 2007	Seyler et al 2007	Seyler et al 2007
MAR	Fifteen-Twenty TF	0.37	91	2.8	3.245	68	Seyler et al 2007	Seyler et al 2007	Seyler et al 2007	Seyler et al 2007
MAR	Fifteen-Twenty TF	0.4	92	2.79	2.985	64	Seyler et al 2007	Seyler et al 2007	Seyler et al 2007	Seyler et al 2007
MAR	Fifteen-Twenty TF	0.37	91	2.89	3.195	68	Seyler et al 2007	Seyler et al 2007	Seyler et al 2007	Seyler et al 2007
MAR	Fifteen-Twenty TF	0.42	91	2.615	3.27	65	Seyler et al 2007	Seyler et al 2007	Seyler et al 2007	Seyler et al 2007
MAR	Fifteen-Twenty TF	0.37	91	2.27333	2.51	64	Seyler et al 2007	Seyler et al 2007	Seyler et al 2007	Seyler et al 2007
MAR	Fifteen-Twenty TF	0.41	92	2.43	1.75	67	Seyler et al 2007	Seyler et al 2007	Seyler et al 2007	Seyler et al 2007
MAR	Fifteen-Twenty TF	0.41	92	2.795	2.83667	77	Seyler et al 2007	Seyler et al 2007	Seyler et al 2007	Seyler et al 2007
MAR	Fifteen-Twenty TF	0.34	92	2.775	2.43	70	Seyler et al 2007	Seyler et al 2007	Seyler et al 2007	Seyler et al 2007
MAR	Fifteen-Twenty TF	0.32	92	2.47	2.22	66	Seyler et al 2007	Seyler et al 2007	Seyler et al 2007	Seyler et al 2007
MAR	Fifteen-Twenty TF	0.42	92	2.94	3.29	68	Seyler et al 2007	Seyler et al 2007	Seyler et al 2007	Seyler et al 2007
MAR	Fifteen-Twenty TF	0.4	91	2.79	3.32	68	Seyler et al 2007	Seyler et al 2007	Seyler et al 2007	Seyler et al 2007
MAR	Fifteen-Twenty TF	0.35	92	2.82	3.07	70	Seyler et al 2007	Seyler et al 2007	Seyler et al 2007	Seyler et al 2007
MAR	Fifteen-Twenty TF	0.34	92	2.81	3.25	70	Seyler et al 2007	Seyler et al 2007	Seyler et al 2007	Seyler et al 2007
MAR	Fifteen-Twenty TF	0.3	92	2.76	3.02	69	Seyler et al 2007	Seyler et al 2007	Seyler et al 2007	Seyler et al 2007
MAR	Fifteen-Twenty TF	0.3	92	2.285	2.65	67	Seyler et al 2007	Seyler et al 2007	Seyler et al 2007	Seyler et al 2007
MAR	Fifteen-Twenty TF	0.34	91	2.35	2.99	66	Seyler et al 2007	Seyler et al 2007	Seyler et al 2007	Seyler et al 2007
MAR	Fifteen-Twenty TF	0.41	91	2.57	2.98667	67	Seyler et al 2007	Seyler et al 2007	Seyler et al 2007	Seyler et al 2007
MAR	Fifteen-Twenty TF	0.43	91	2.22	2.72		Seyler et al 2007	Seyler et al 2007	Seyler et al 2007
MAR	Vema TF	0.36	90				Cipriani et al 2009b
MAR	Vema TF	0.38	91	4.21	5.58	72	Brunelli et al 2006	Brunelli et al 2006	Brunelli et al 2006	Brunelli et al 2006
MAR	Vema TF	0.36	91	4.09	5.31	68	Brunelli et al 2006	Brunelli et al 2006	Brunelli et al 2006	Brunelli et al 2006
MAR	Vema TF	0.38	89	4.6	6	72	Prinz et al 1976	Prinz et al 1976	Prinz et al 1976	Prinz et al 1976
MAR	Doldrums TF	0.37	89	4.8	4.74	62	Bonatti et al 1992	Bonatti et al 1992	Bonatti et al 1992	Bonatti et al 1992
MAR	Doldrums TF	0.39	91	2.15	3.41	64	Bonatti et al 1992	Bonatti et al 1992	Bonatti et al 1992	Bonatti et al 1992
MAR	Doldrums TF	0.39	90	4.54	5.13	60	Bonatti et al 1992	Bonatti et al 1992	Bonatti et al 1992	Bonatti et al 1992
MAR	Doldrums TF	0.3	90	2.93	5.33	67	Bonatti et al 1992	Bonatti et al 1992	Bonatti et al 1992	Bonatti et al 1992
MAR	St Paul TF	0.3	92	1.73		61	Bonatti et al 1992	Bonatti et al 1992		Bonatti et al 1992
MAR	St Paul TF	0.33	91			66	Bonatti et al 1992			Bonatti et al 1992
MAR	SPTF: ITR-A	0.390178	90	4.43967	5.154	74	Brunelli & Seyler 2010	Brunelli & Seyler 2010	Brunelli & Seyler 2010	Brunelli & Seyler 2010
MAR	SPTF: ITR-A	0.414667	91	4.16114	5.32667	70	Brunelli & Seyler 2010	Brunelli & Seyler 2010	Brunelli & Seyler 2010	Brunelli & Seyler 2010
MAR	SPTF: ITR-A	0.398571	91	3.9258	5.2	73	Brunelli & Seyler 2010	Brunelli & Seyler 2010	Brunelli & Seyler 2010	Brunelli & Seyler 2010
MAR	SPTF: ITR-A	0.399833	91	3.54817	5.59	67	Brunelli & Seyler 2010	Brunelli & Seyler 2010	Brunelli & Seyler 2010	Brunelli & Seyler 2010
MAR	Romanche TF: East		92				Prinz et al 1976
MAR	Romanche TF: East	0.25	90	3.97	5.22	74	Bryndzia & Wood 1990	Bryndzia & Wood 1990	Bryndzia & Wood 1990	Bryndzia & Wood 1990
MAR	Romanche TF: East	0.24	91	3.9	5.18	72	Bryndzia & Wood 1990	Bryndzia & Wood 1990	Bryndzia & Wood 1990	Bryndzia & Wood 1990
MAR	Romanche TF: West	0.37	90	5.99	7.78	74	Bonatti et al 1993	Bonatti et al 1993	Bonatti et al 1993	Bonatti et al 1993
MAR	Romanche TF: West	0.42	90	5.81		75	Bonatti et al 1993	Bonatti et al 1993		Bonatti et al 1993
MAR	22 deg S TF	0.38	91		4.57	72.6236	Mallick et al 2014		Mallick et al 2014	Mallick et al 2014
MAR	22 deg S TF	0.39	91	3.85	4.85	74	Bryndzia & Wood 1990	Bryndzia & Wood 1990	Bryndzia & Wood 1990	Bryndzia & Wood 1990
MAR	22 deg S TF	0.35	91			74	Bryndzia & Wood 1990			Bryndzia & Wood 1990
AAR	Conrad TF	0.34	90	4.26	4.87	70	Brunelli et al 2003	Brunelli et al 2003	Brunelli et al 2003	Brunelli et al 2003
AAR	Conrad TF	0.51	90	3.72		74	Brunelli et al 2003	Brunelli et al 2003		Brunelli et al 2003
AAR	Conrad TF	0.3	89	4.16		73	Brunelli et al 2003	Brunelli et al 2003		Brunelli et al 2003
AAR	Bullard TF: East	0.33	91			73	Dick 1989			Dick 1989
AAR	Bullard TF: East	0.32	90	4.03	5.32	74	Johnson et al 1990	Johnson et al 1990	Johnson et al 1990	Johnson et al 1990
AAR	Bullard TF: East	0.32	90			76	Dick 1989			Dick 1989
AAR	Bullard TF: East	0.31	90			80	Johnson et al 1990			Johnson et al 1990
AAR	Bullard TF: East	0.34	91	4.37	5.05	76	Johnson et al 1990	Johnson et al 1990	Johnson et al 1990	Johnson et al 1990
AAR	Bullard TF: East	0.35	91	4.24	5.12	76	Dick 1989	Dick 1989	Dick 1989	Dick 1989
AAR	Bullard TF: East	0.33	91	4.14	5.2	76	Dick 1989	Dick 1989	Dick 1989	Dick 1989
AAR	Bullard TF: East	0.36	90	4.67	5.79	78	Dick 1989	Dick 1989	Dick 1989	Dick 1989
AAR	Bullard TF: East	0.34	91	5.08		77	Dick 1989	Dick 1989		Dick 1989
AAR	Vulcan TF	0.32	90			81	Dick 1989			Dick 1989
AAR	Vulcan TF	0.31	90		8.2	83	Johnson et al 1990		Johnson et al 1990	Johnson et al 1990
AAR	Vulcan TF	0.28	90	5.1	5.95	78	Dick 1989	Dick 1989	Dick 1989	Dick 1989
AAR	Vulcan TF	0.34	90	4.18	5.68	78	Johnson et al 1990	Dick 1989	Johnson et al 1990	Dick 1989
AAR	Vulcan TF	0.29	90	4.94	6.1	78	Dick 1989	Dick 1989	Dick 1989	Dick 1989
AAR	Vulcan TF	0.3	90	5.83	7.14	79	Dick 1989	Dick 1989	Dick 1989	Dick 1989
AAR	Vulcan TF	0.34	89	3.85	5.32	74	Dick 1989	Dick 1989	Dick 1989	Dick 1989
SWIR	Bouvet TF	0.29	91	3.2	4.58	73	Johnson et al 1990	Johnson et al 1990	Johnson et al 1990	Bryndzia & Wood 1990
SWIR	Bouvet TF	0.38	91	3.41	4.37	68	Brunelli et al 2003	Brunelli et al 2003	Brunelli et al 2003	Brunelli et al 2003
SWIR	Bouvet TF	0.5	90	3	3.89	68	Brunelli et al 2003	Brunelli et al 2003	Brunelli et al 2003	Brunelli et al 2003
SWIR	Bouvet TF	0.44	90	3.23	3.75	69	Brunelli et al 2003	Brunelli et al 2003	Brunelli et al 2003	Brunelli et al 2003
SWIR	Bouvet TF	0.5	90	2.04	3.8	65	Brunelli et al 2003	Brunelli et al 2003	Brunelli et al 2003	Brunelli et al 2003
SWIR	Bouvet TF	0.36	91	3.1	4.52	65	Brunelli et al 2003	Brunelli et al 2003	Brunelli et al 2003	Brunelli et al 2003
SWIR	Bouvet TF	0.47	90	2.79	3.55	70	Brunelli et al 2003	Brunelli et al 2003	Brunelli et al 2003	Brunelli et al 2003
SWIR	Bouvet TF	0.4	91	2.96		61	Brunelli et al 2003	Brunelli et al 2003		Brunelli et al 2003
SWIR	Bouvet TF	0.51	90	2.4		55	Brunelli et al 2003	Brunelli et al 2003		Brunelli et al 2003
SWIR	Bouvet TF	0.34	91	2.96		59	Brunelli et al 2003	Brunelli et al 2003		Brunelli et al 2003
SWIR	Bouvet TF	0.41	91	2.72		59	Brunelli et al 2003	Brunelli et al 2003		Brunelli et al 2003
SWIR	Islas Orcadas TF	0.4	90	5.28	6.79	81	Johnson et al 1990	Johnson et al 1990	Johnson et al 1990	Johnson et al 1990
SWIR	Islas Orcadas TF	0.23	90	5.69	6.55	78	Dick 1989	Dick 1989	Dick 1989	Dick 1989
SWIR	Islas Orcadas TF	0.27	90	5.98	5.56	78	Johnson et al 1990	Johnson et al 1990	Johnson et al 1990	Bryndzia & Wood 1990
SWIR	Islas Orcadas TF	0.32	90	5.15	6.62	78	Dick 1989	Dick 1989	Dick 1989	Dick 1989
SWIR	Islas Orcadas TF	0.26	90	5.81	5.8	77	Johnson et al 1990	Johnson et al 1990	Johnson et al 1990	Johnson et al 1990
SWIR	Islas Orcadas TF	0.33	90	4.51		74	Dick 1989	Dick 1989		Dick 1989
SWIR	Islas Orcadas TF	0.24	91	5.03	5.81	78	Dick 1989	Dick 1989	Dick 1989	Dick 1989
SWIR	Islas Orcadas TF	0.27	91	4.98	5.66	77	Dick 1989	Dick 1989	Dick 1989	Dick 1989
SWIR	Islas Orcadas TF	0.28	90	5.2	6.26	78	Dick 1989	Dick 1989	Dick 1989	Dick 1989
SWIR	Islas Orcadas TF	0.25	91	3.93	5.09	75	Dick 1989	Dick 1989	Dick 1989	Dick 1989
SWIR	Shaka TF	0.34725	90			72	Jaroslow et al 1996			Jaroslow et al 1996
SWIR	Shaka TF	0.34	90	3.03			Johnson et al 1990	Johnson et al 1990
SWIR	Shaka TF	0.31875	90	4.98	5.21	77	Jaroslow et al 1996	Snow 1993	Snow 1993	Jaroslow et al 1996
SWIR	Shaka TF	0.363	90	3.52		78	Jaroslow et al 1996	Snow 1993		Jaroslow et al 1996
SWIR	Oblique Segment	0.191617	90	5.20722	6.20101	76	Warren 2007	Warren 2007	Warren 2007	Warren 2007
SWIR	Oblique Segment	0.2072	91	5.754	6.27481	75	Warren 2007	Warren 2007	Warren 2007	Warren 2007
SWIR	Oblique Segment	0.401583	90	5.04233	6.09729	68	Warren 2007	Warren 2007	Warren 2007	Warren 2007
SWIR	Oblique Segment	0.248467	90	4.14144	5.79074	70	Warren 2007	Warren 2007	Warren 2007	Warren 2007
SWIR	Oblique Segment	0.1883	90	5.60479	7.3754	77	Warren 2007	Warren 2007	Warren 2007	Warren 2007
SWIR	Oblique Segment	0.4081	90	6.11937	7.23329	75	Warren et al 2009	Warren et al 2009	Warren et al 2009	Warren et al 2009
SWIR	Oblique Segment	0.39115	91	4.04181	6.67231	74	Warren 2007	Warren 2007	Warren 2007	Warren 2007
SWIR	Oblique Segment	0.371417	90	5.04886	7.04305	75	Warren 2007	Warren 2007	Warren 2007	Warren 2007
SWIR	Oblique Segment	0.3264	91	3.98724	5.37739	72	Warren et al 2009	Warren et al 2009	Warren et al 2009	Warren et al 2009
SWIR	Oblique Segment	0.34515	90	5.20023	6.2776	74	Warren et al 2009	Warren et al 2009	Warren et al 2009	Warren et al 2009
SWIR	Oblique Segment	0.329167	90	5.24127	6.30767	74	Warren et al 2009	Warren et al 2009	Warren et al 2009	Warren et al 2009
SWIR	Oblique Segment	0.3497	90	4.60864	5.80173	71	Warren et al 2009	Warren et al 2009	Warren et al 2009	Warren et al 2009
SWIR	Oblique Segment	0.386017	90	5.57917	7.06476	72	Warren et al 2009	Warren et al 2009	Warren et al 2009	Warren et al 2009
SWIR	Prince Edward TF	0.3125	90			70	Jaroslow et al 1996			Jaroslow et al 1996
SWIR	Prince Edward TF	0.31	89			72	Jaroslow et al 1996			Jaroslow et al 1996
SWIR	Prince Edward TF	0.3445	90			76	Jaroslow et al 1996			Jaroslow et al 1996
SWIR	Gallieni TF	0.319	91			75	Jaroslow et al 1996			Jaroslow et al 1996
SWIR	Ridge at 53-56E	0.39	90	4.52	5.25	71	Seyler et al 2003	Seyler et al 2003	Seyler et al 2011	Seyler et al 2003
SWIR	Ridge at 53-56E	0.42	90	4.19	5.75	73	Seyler et al 2003	Seyler et al 2011	Seyler et al 2011	Seyler et al 2003
SWIR	Ridge at 53-56E	0.39	90	4.54	5.62	69	Seyler et al 2003	Seyler et al 2003	Seyler et al 2011	Seyler et al 2003
SWIR	Ridge at 53-56E	0.39	90	3.54	4.6	62	Seyler et al 2003	Seyler et al 2003	Seyler et al 2003	Seyler et al 2003
SWIR	Ridge at 53-56E	0.35	90	4.07	4.95	67	Seyler et al 2003	Seyler et al 2003	Seyler et al 2003	Seyler et al 2003
SWIR	Ridge at 53-56E	0.38	90	4.35	4.74667	62	Seyler et al 2003	Seyler et al 2003	Seyler et al 2003	Seyler et al 2003
SWIR	Ridge at 53-56E	0.39	91	4.09	5.21	70	Seyler et al 2003	Seyler et al 2003	Seyler et al 2011	Seyler et al 2003
SWIR	Ridge at 53-56E	0.39	91	3.72	4.60667	70	Seyler et al 2003	Seyler et al 2003	Seyler et al 2003	Seyler et al 2003
SWIR	Ridge at 53-56E	0.36	91	3.69	4.785	70	Seyler et al 2003	Seyler et al 2003	Seyler et al 2003	Seyler et al 2003
SWIR	Ridge at 53-56E	0.39	90	4.16	4.125	70	Seyler et al 2003	Seyler et al 2003	Seyler et al 2003	Seyler et al 2003
SWIR	Atlantis II TF	0.377	91	5.02375	6.3435		Coogan et al 2004	Coogan et al 2004	Coogan et al 2004
SWIR	Atlantis II TF	0.349	90			68	Jaroslow et al 1996			Jaroslow et al 1996
SWIR	Atlantis II TF	0.36	90	4.71	6.51	73	Johnson & Dick 1992	Johnson & Dick 1992	Johnson & Dick 1992	Johnson & Dick 1992
SWIR	Atlantis II TF	0.44	90	4.74	6.6		Johnson & Dick 1992	Johnson & Dick 1992	Johnson & Dick 1992
SWIR	Atlantis II TF	0.38	90	4.99	5.92		Johnson & Dick 1992	Johnson & Dick 1992	Johnson & Dick 1992
SWIR	AIITF: RTI	0.3149	90	4.7355	5.86346	74	Warren & Shimizu 2010	Warren & Shimizu 2010	Warren & Shimizu 2010	Warren & Shimizu 2010
SWIR	AIITF: RTI	0.35	90	5.5	6.64	76	Johnson & Dick 1992	Johnson & Dick 1992	Johnson & Dick 1992	Johnson & Dick 1992
SWIR	AIITF: Atlantis Bank	0.344783	91	4.60987	5.11768	74	Warren & Shimizu 2010	Warren & Shimizu 2010	Warren & Shimizu 2010	Warren & Shimizu 2010
SWIR	AIITF: Atlantis Bank	0.37	90	4.5	5.211	74	Morishita et al 2007	Morishita et al 2007	Morishita et al 2007	Morishita 2007
SWIR	AIITF: Atlantis Bank	0.39	91	3.25	4.62667	71	Morishita et al 2007	Morishita et al 2007	Morishita et al 2007	Morishita 2007
SWIR	AIITF: Atlantis Bank	0.3514	90			75	Coogan et al 2004			Cougan et al 2004
SWIR	AIITF: Atlantis Bank	0.361833	91			75	Coogan et al 2004			Cougan et al 2004
SWIR	AIITF: Atlantis Bank	0.399229	90	4.86669	6.1425	75	Warren & Shimizu 2010	Warren & Shimizu 2010	Warren & Shimizu 2010	Warren & Shimizu 2010
SWIR	AIITF: Atlantis Bank	0.345017	90	5.26476	5.90362	76	Warren & Shimizu 2010	Warren & Shimizu 2010	Warren & Shimizu 2010	Warren & Shimizu 2010
SWIR	AIITF: Atlantis Bank	0.368317	90	4.26056	5.83346	75	Warren & Shimizu 2010	Warren & Shimizu 2010	Warren & Shimizu 2010	Warren & Shimizu 2010
SWIR	AIITF: Atlantis Bank	0.4065	91	4.9425	6.45	76	Coogan et al 2004	Coogan et al 2004	Coogan et al 2004	Cougan et al 2004
SWIR	AIITF: Atlantis Bank	0.373625	91	5.03538	6.194	76	Coogan et al 2004	Coogan et al 2004	Coogan et al 2004	Cougan et al 2004
SWIR	Ridge at 59E	0.35	89	4.58	6.08	71	Seyler et al 2003	Seyler et al 2003	Seyler et al 2003	Seyler et al 2003
SWIR	Ridge at 59E	0.38	90	4.8	5.87	75	Seyler et al 2003	Seyler et al 2003	Seyler et al 2011	Seyler et al 2003
SWIR	Ridge at 59E	0.37	90	4.35	5.35	72	Seyler et al 2003	Seyler et al 2003	Seyler et al 2003	Seyler et al 2003
SWIR	Ridge at 62-68E	0.43	91	4.32	5.91	73	Seyler et al 2003	Seyler et al 2011	Seyler et al 2011	Seyler et al 2003
SWIR	Ridge at 62-68E	0.35	90	3.56	4.93	64	Seyler et al 2003	Seyler et al 2011	Seyler et al 2011	Seyler et al 2003
SWIR	Ridge at 62-68E	0.41	90	4.52	5.81	69	Seyler et al 2003	Seyler et al 2011	Seyler et al 2011	Seyler et al 2003
SWIR	Ridge at 62-68E	0.33	89		4.955	69	Seyler et al 2003		Seyler et al 2003	Seyler et al 2003
SWIR	Ridge at 62-68E	0.4	89		5.92	69	Seyler et al 2003		Seyler et al 2003	Seyler et al 2003
SWIR	Ridge at 62-68E	0.37	90	5.7	6.23	70	Seyler et al 2003	Seyler et al 2003	Seyler et al 2003	Seyler et al 2003
SWIR	Ridge at 62-68E	0.36	90	4.41333	5.74333	73	Seyler et al 2003	Seyler et al 2003	Seyler et al 2003	Seyler et al 2003
SWIR	Ridge at 62-68E	0.41	91	5.84	6.51	75	Seyler et al 2003	Seyler et al 2003	Seyler et al 2011	Seyler et al 2003
SWIR	Ridge at 62-68E	0.37	90	5.39	6.34	73	Seyler et al 2003	Seyler et al 2011	Seyler et al 2011	Seyler et al 2003
SWIR	Ridge at 62-68E	0.39	90	4.81	6.36	73	Seyler et al 2003	Seyler et al 2011	Seyler et al 2011	Seyler et al 2003
SWIR	Ridge at 62-68E	0.37	90	4.32	6.82	69	Seyler et al 2003	Seyler et al 2003	Seyler et al 2003	Seyler et al 2003
SWIR	Ridge at 62-68E	0.35	90	5.57	7.11	74	Seyler et al 2003	Seyler et al 2011	Seyler et al 2011	Seyler et al 2003
SWIR	Ridge at 62-68E	0.32	90	4.4	6.22	74	Seyler et al 2003	Seyler et al 2003	Seyler et al 2003	Seyler et al 2003
SWIR	Ridge at 62-68E	0.4	89	6.07	7.09	70	Seyler et al 2003	Seyler et al 2003	Seyler et al 2011	Seyler et al 2003
SWIR	Ridge at 62-68E	0.37	90	4.96	3.38	76	Seyler et al 2003	Seyler et al 2003	Seyler et al 2003	Seyler et al 2003
SWIR	Ridge at 62-68E	0.38	89				Seyler et al 2003
GAK	Gakkel EVZ	0.38	91	5.17168	6.13	75	D'Errico et al 2016	D'Errico et al 2016	Hellebrand et al 2005	D'Errico et al 2016
GAK	Gakkel SMZ	0.3954	92	1.795		62	D'Errico et al 2016	D'Errico et al 2016		D'Errico et al 2016
GAK	Gakkel SMZ	0.409667	92	2.02163		62	D'Errico et al 2016	D'Errico et al 2016		D'Errico et al 2016
GAK	Gakkel SMZ	0.398063	92	2.16675		62	D'Errico et al 2016	D'Errico et al 2016		D'Errico et al 2016
GAK	Gakkel SMZ	0.43758	92	2.03213			D'Errico et al 2016	D'Errico et al 2016
GAK	Gakkel SMZ	0.41382	92	2.27546		60	D'Errico et al 2016	D'Errico et al 2016		D'Errico et al 2016
GAK	Gakkel SMZ	0.3639	91	5.64946	6.67153	75	D'Errico et al 2016	D'Errico et al 2016	D'Errico et al 2016	D'Errico et al 2016
GAK	Gakkel SMZ	0.356775	91	5.47134	6.6084	76	D'Errico et al 2016	D'Errico et al 2016	D'Errico et al 2016	D'Errico et al 2016
GAK	Gakkel SMZ	0.368087	90	5.61092	7.00173	76	D'Errico et al 2016	D'Errico et al 2016	D'Errico et al 2016	D'Errico et al 2016
GAK	Gakkel SMZ	0.3629	91	5.20372	6.54677	75	D'Errico et al 2016	D'Errico et al 2016	D'Errico et al 2016	D'Errico et al 2016
GAK	Gakkel SMZ	0.0953875	90	5.31052	6.29568	71	D'Errico et al 2016	D'Errico et al 2016	D'Errico et al 2016	D'Errico et al 2016
LT	Lena Trough	0.383812	91	3.88364			Laukert et al 2014	Laukert et al 2014
LT	Lena Trough	0.381333	91	4.41714		75	Laukert et al 2014	Laukert et al 2014		Laukert et al 2014

## Sheet: Opx
SiO2	TiO2	Al2O3	FeO	MnO	MgO	CaO	Na2O	Cr2O3	Mg#
53.36	0.16	6.46	6.27	0.12	30.55	2.18	0.05	0.76	0.908
57	0.02	2.43	6.06	0.13	33.14	1.47	0.01	0.64	0.907
54.467	0.005	2.615	5.842	0.198	34.69	1.521	0.026	0.801	0.995
55.8	0.07	2.23	5.6	0.13	32.8	2.53	0	0.87	0.934
56.1	0.07	2.16	6	0.14	33.2	1.91	0	0.73	0.927
56.05	0.035	2.465	5.75	0.135	33.1	1.635	0.03	0.76	0.927
56	0.02	2.18	5.8	0.14	33	1.95	0	0.78	0.924
55.9	0.02	2.19	5.6	0.15	32.4	2.45	0	0.78	0.919
55.9	0.02	2.18	5.7	0.14	32.3	2.09	0	0.75	0.909
56.1	0.02	2.1	5.7	0.15	32.7	2.24	0	0.75	0.919
56.2	0.02	2.18	5.8	0.14	32.7	2.3	0	0.76	0.919
56.2	0.02	2.08	5.8	0.14	32.8	2.13	0	0.7	0.918
56.09	0.21	2.05	5.78	0.17	31.49	3.05	0	0.9	0.906
54.58	0.01	3.31	6.15	0.15	33.84	1.66	0	0.75	0.968
55.17	0	3.89	5.52	0.1	32.26	2.39	0	0.23	0.918
55.26	0	3.89	5.47	0.11	31.85	2.33	0.02	0.24	0.921
55.44	0	3.57	5.48	0.1	32.03	2.31	0.04	0.38	0.912
54.76	0.04	4.38	5.28	0.11	31.29	2.32	0.05	0.31	0.913
54.6	0.03	4.39	5.5	0.08	31.64	2.23	0.05	0.49	0.914
53.9	0.03	4.81	5.87	0.15	33.08	1.97	0.02	0.85	0.968
54.39	0.04	4.18	5.85	0.13	34.13	1.23	0.02	0.97	0.976
54.37	0.02	3.95	6.03	0.14	33.07	2.16	0.02	0.94	0.964
55.53	0.1	3.47	4.93	0.04	33.99	1.91	0.02	0.62	0.958
53.58	0.06	4.1	5.48	0.17	32.59	2.45	0.03	1.02	0.973
55.83	0.02	2.87	5.14	0.12	33.99	1.82	0.06	0.83	0.957
54.66	0	4.59	5.63	0.08	31.6	2.09	0.11	0.65	0.916
54.55	0	4.74	5.56	0.12	31.65	2.12	0.04	0.22	0.91
54.26	0	4.49	5.81	0.1	31.65	2.09	0.03	0.43	0.916
54.38	0.05	3.97	5.67	0.13	33.13	1.27	0.03	0.87	0.947
54.35	0.04	4.05	5.49	0.09	33.18	1.39	0.01	0.91	0.95
54.05	0.05	4.26	5.39	0.13	32.44	2.1	0.03	0.98	0.951
53.9	0.12	5.16	5.85	0.13	32.4	1.44	0.05	0.81	0.939
53.6	0.13	5.3	6.28	0.13	33.4	1.04	0.05	0.46	0.96
54.5	0.18	3.11	6.79	0.16	32.4	1.78	0.03	0.65	0.931
54.1	0.14	4.97	6.19	0.11	31.6	1.49	0	0.93	0.911
54.8	0.02	5.02	5.75	0.03	32.4	1.42	0.02	0.52	0.915
54	0.08	4.82	6.55	0.11	31.4	1.56	0	0.83	0.907
54.8	0.07	3.71	6.22	0.13	31.8	1.52	0	0.93	0.905
54.8	0.09	4.25	6.57	0.13	33.3	0.67	0	0.94	0.932
55.49	0.06	2.4	4.95	0.09	33.45	2.11	0.01	0.22	0.941
54.72	0.02	2.45	4.8	0	33.94	2.25	0.01	0.57	0.976
55.2	0.08	2.13	5.07	0.07	33.55	2.47	0	0.33	0.957
55.44	0.01	2.42	5.47	0.13	33.88	1.66		0.75	0.953
55.39	0.02	2.64	5.36	0.13	32.96	2		0.88	0.936
55.995	0.11	2.51	6.38	0.17	32.54	2.34		0.825	0.92
55.46	0	2.75	5.55	0.13	32.03	2.6		0.91	0.92
55.08	0.01	2.83	5.53	0.16	32.86	2.93		0.87	0.958
55.63	0.03	2.64	6.71	0.14	31.97	2.33		0.9	0.911
55.34	0	2.9	6.59	0.16	32.56	2.13		0.95	0.93
54.81	0.01	3.3	6.44	0.14	32.46	2.45		0.85	0.941
55.34	0	2.745	6.43	0.15	32.96	2.01		0.775	0.936
53.79	0.07	5.34	6.44	0.13	31.88	0.95	0.06	0.73	0.916
53.54	0.11	5.7	6.05	0.15	30.78	2.2	0.04	0.81	0.912
53.95	0.09	5.33	6.08	0.13	31.33	1.75	0.03	0.83	0.912
53.89	0.09	5.03	6.06	0.13	31.11	2.31	0.04	0.77	0.917
54.35	0.08	5.07	5.98	0.11	32.26	2.3	0.04	0.71	0.941
55.35	0.09	3.96	6.12	0.13	32.6	0.92	0	0.66	0.904
54.79	0.11	4.62	5.85	0.12	32.41	1.49	0.03	0.81	0.923
54.69	0.08	4.7	6.26	0.12	32.68	1.46	0.02	0.62	0.928
54.13	0.07	4.69	6.09	0.13	32.15	1.58	0.01	0.66	0.925
54.38	0.07	4.98	6.24	0.12	32.62	0.95	0.01	0.75	0.923
55.16	0.07	3.45	5.85	0.12	32.48	1.89	0.02	0.96	0.927
55.17	0.07	3.62	5.73	0.12	32.6	1.66	0.02	0.98	0.926
55.41	0.07	3.86	5.83	0.15	32.66	1.25	0.02	0.9	0.915
55.115	0.055	4.01	5.9	0.155	32.45	1.235	0.01	0.56	0.909
55.05	0.055	4.07	6.035	0.145	32.155	1.44	0.04	0.76	0.91
55.64	0.075	3.87	6.125	0.095	32.65	0.92	0.02	0.575	0.904
54.535	0.055	4.93	6.295	0.155	32.235	0.961	0.02	0.745	0.915
54.9	0.06	3.59	5.6	0.13	32.22	1.87	0.11	0.97	0.93
54.16	0.06	4.46	6.05	0.15	31.65	1.98	0.01	0.77	0.92
53.55	0.06	4.79	5.99	0.15	31.73	1.85	0.03	0.91	0.934
55.21	0.06	4.23	5.96	0.16	32.1	1.46	0.04	0.82	0.907
55.04	0.08	4.09	5.82	0.16	31.36	2.65	0.07	0.9	0.915
54.55	0.05	4.75	5.94	0.14	31.36	2.29	0.03	0.82	0.912
54.9	0.04	4.25	6.07	0.16	31.97	1.46	0.03	0.71	0.907
54.98	0.05	3.7	6.1	0.14	32.39	1.27	0.01	0.63	0.915
54.66	0.06	4.09	6.18	0.27	31.92	1.65	0.02	0.76	0.915
54.18	0.08	4.5	6.11	0.15	31.6	1.65	0.03	0.88	0.915
54.41	0.06	4.39	6.05	0.15	31.78	1.88	0.05	0.83	0.921
54.6	0.06	4.34	6.11	0.18	31.67	1.98	0.06	0.83	0.917
54.57	0.05	4.35	5.96	0.14	31.83	1.96	0.01	0.84	0.915
54.54	0.04	4.45	5.82	0.13	31.35	2.05	0	0.91	0.907
55.18	0.04	3.76	5.97	0.14	31.99	2.07	0.04	0.88	0.917
54.62	0.05	3.79	5.74	0.15	32.97	1.49	0.01	0.79	0.94
55.11	0.05	3.98	5.21	0.13	32.34	1.92	0.01	0.87	0.923
54.51	0.04	4.38	5.47	0.13	31.9	2.06	0.01	0.93	0.924
55.3	0.04	4	5.76	0.15	32.57	2.03	0.01	0.81	0.927
54.89	0.05	4.59	5.92	0.13	31.88	2.03	0.01	0.96	0.917
54.69	0.05	4.22	5.7	0.13	31.76	2.26	0.02	0.88	0.921
54.66	0.05	4.32	5.78	0.13	31.85	2.19	0.01	0.91	0.922
55.45	0.03	3.79	5.92	0.14	33	1.5	0.01	0.71	0.925
55.65	0.03	4.37	5.96	0.14	33.03	1.01	0.01	0.87	0.916
54.62	0.03	4.23	5.98	0.13	32.83	1.55	0.01	0.83	0.938
55.58	0.05	4.18	5.91	0.13	32.98	1.18	0.02	0.85	0.919
55.36	0.05	4.27	5.91	0.13	32.52	1.63	0.02	0.91	0.919
54.4	0.06	4.78	5.82	0.14	31.48	1.86	0	1.03	0.911
55.14	0.03	4.19	5.955	0.15	32.69	1.23	0.01	0.81	0.919
54.96	0.04	4.74	5.97	0.14	32.54	1.41	0.01	0.94	0.922
54.69	0.04	4.63	5.71	0.12	32.48	1.74	0.01	0.99	0.932
55.27	0.02	3.83	5.95	0.15	32.53	1.15	0.01	0.73	0.909
55.14	0.05	3.91	5.91	0.14	32.17	1.32	0	0.77	0.906
54.87	0.05	4.09	5.96	0.15	32.21	1.73	0	0.88	0.919
55.09	0.05	4.23	6.04	0.15	32.38	1.31	0	0.79	0.911
54.61	0.05	4.42	5.9	0.14	31.78	2.24	0.01	0.98	0.923
55.3	0.04	3.74	5.78	0.11	33.03	1.42	0.01	0.74	0.927
55.01	0.04	3.84	5.74	0.1	32.81	1.84	0	0.76	0.934
54.7	0.05	3.8	5.61	0.13	32.4	1.56	0.01	0.73	0.923
55.63	0	3.75	5.58	0.11	32.86	1.79	0	0.68	0.922
55.03	0.01	3.97	5.76	0.08	32.99	1.29	0	0.75	0.928
55.64	0	4.06	5.96	0.13	32.81	1.48	0	0.8	0.917
55.05	0.05	3.51	6.27	0.14	32.89	1.12	0	0.81	0.923
55.96	0.07	2.9	5.84	0.13	33.68	1.2	0.01	0.75	0.93
55.62	0.01	3.83	5.72	0.11	33.1	1.59	0	0.73	0.926
54.63	0.05	4.2	5.96	0.13	32	2.01	0.01	0.9	0.924
54.52	0.04	4.32	5.65	0.13	31.65	2.14	0.01	0.95	0.919
54.48	0.04	3.97	5.68	0.14	32.37	2.07	0.01	0.8	0.937
54.8	0.04	4.16	5.33	0.14	32.46	1.83	0.01	0.86	0.903
54.78	0.035	3.955	5.64	0.13	32.26	2.065	0.015	0.815	0.929
55.07	0.05	3.68	5.65	0.14	32.38	1.97	0.02	0.76	0.925
54.9	0.04	4.01	5.75	0.13	31.96	2.24	0.01	0.84	0.921
54.9	0.04	4.09	5.915	0.135	32.26	1.97	0.01	0.855	0.925
55.02	0.04	3.94	5.68	0.14	31.96	1.87	0.01	0.83	0.912
54.445	0.04	4.155	5.77	0.14	32.215	2.06	0.01	0.86	0.934
54.63	0.04	4.21	5.35	0.14	32.13	2.16	0.01	0.91	0.931
54.37	0.06	4.44	5.72	0.13	31.58	2.35	0.01	0.97	0.924
54.09	0.05	4.35	5.79	0.14	32.18	2.18	0.01	0.93	0.943
54.52	0.04	4.05	5.39	0.13	32.33	1.95	0.01	0.84	0.933
54.92	0.04	3.98	5.52	0.15	32.07	1.93	0.01	0.8	0.918
55.32	0.05	4	5.59	0.14	32.05	2.04	0.01	0.81	0.912
55.78	0.04	3.98	6.04	0.13	33.06	1.28	0.01	0.84	0.919
54.86	0.03	4.33	6.05	0.14	32.78	1.35	0.01	0.88	0.929
55.45	0.03	4.2	6	0.14	32.67	1.56	0.01	0.88	0.92
55.34	0.04	3.85	6.06	0.13	33.13	1.18	0.01	0.77	0.926
55.75	0.03	4.13	6.03	0.13	32.98	1.22	0.01	0.86	0.916
55.08	0.04	4.01	5.87	0.14	32.21	1.76	0.01	0.81	0.916
55.65	0.06	1.94	5.96	0.13	33.04	1.22	0	0.78	0.918
55.44	0.05	3.87	6.12	0.15	32.71	1.42	0.01	0.72	0.917
55.3	0.04	4.08	5.94	0.14	32.98	1.44	0.02	0.79	0.928
54.92	0.05	4.29	6.04	0.13	32.04	1.77	0.02	0.92	0.916
55.19	0.06	3.76	6.1	0.15	32.65	1.71	0.02	0.73	0.925
55.07	0.03	4.45	6.35	0.14	32.47	1.24	0.01	0.93	0.915
55.13	0.05	3.88	5.88	0.14	32.77	1.62	0.02	0.71	0.927
55.39	0.04	4.14	5.96	0.14	33.07	1.48	0.02	0.84	0.93
54.63	0.06	4.96	6.02	0.13	32.19	1.51	0.01	1.02	0.921
55.34	0.04	4.27	6.18	0.11	33.46	1.08	0.01	0.88	0.934
54.63	0.04	4.09	5.82	0.14	32.55	1.62	0.01	0.79	0.93
54.86	0.03	4.08	5.94	0.14	32.35	1.76	0.03	0.81	0.925
54.19	0.03	4.09	6.03	0.15	32.37	1.37	0.02	0.79	0.929
55.2	0.03	4.08	5.94	0.14	32.58	1.43	0.01	0.81	0.918
55.1	0.04	4.24	5.99	0.12	32.19	1.86	0.01	0.94	0.918
54.92	0.04	4.08	5.9	0.14	32.2	1.84	0.02	0.86	0.912
54.83	0.04	4.18	5.86	0.13	32.31	1.8	0.01	0.88	0.92
54.71	0.06	4.31	6	0.14	32.39	1.6	0	0.96	0.926
55.03	0.05	4.14	5.97	0.14	32.65	1.43	0.01	0.91	0.924
54.67	0.06	3.96	5.91	0.13	32.15	1.83	0.01	0.86	0.923
55.41	0.04	3.58	5.99	0.14	32.38	1.57	0.01	0.95	0.913
55.71	0.03	3.58	6.03	0.14	32.48	1.68	0.01	0.94	0.913
55.31	0.04	3.44	5.82	0.13	32.77	1.74	0.01	0.9	0.928
54.77	0.04	3.72	5.69	0.15	32	1.7	0.01	0.89	0.915
55.44	0.04	3.98	5.86	0.12	32.36	1.86	0.01	0.97	0.917
55.42	0.06	3.76	5.83	0.15	32.64	1.85	0.01	0.84	0.9124
55.16	0.04	3.84	5.85	0.13	32.54	1.61	0.01	0.92	0.922
56.1	0.07	2.1	5.62	0.15	33.16	1.52	0.06	0.82	0.924
54.76	0.18	2.8	6.94	0.16	31.31	2.05	0.06	0.95	0.907
55.0896	0.02411	3.779	5.80871	0.129507	31.8806	1.96736	0.0238893	0.844954	0.911
54.7522	0.0290039	3.74633	5.71683	0.105787	31.9804	2.46251	0.00352778	0.833636	0.928
54.6928	0.0397594	3.69544	5.88811	0.139568	32.3717	1.80762	0.0285156	0.813173	0.929
55.879	0.04088	2.46878	5.8145	0.09503	32.957	1.86969	0.025105	0.838215	0.926
54.5361	0.0262867	4.19917	5.89467	0.0886483	32.3369	2.00783	0.0107672	0.839959	0.933
55.1349	0.0465189	3.73056	5.8645	0.144435	32.2981	1.81466	0.115838	0.780982	0.925
53.8572	0.0281	4.54311	5.88383	0.078695	32.1246	1.66714	0.00193556	0.923775	0.933
54.526	0.025375	3.8805	5.806	0.0876	32.271	2.11111	0.067145	0.761805	0.937
53.678	0.042585	5.0055	5.831	0.10613	31.141	2.54294	0.021455	1.17687	0.931
54.7534	0.0570186	4.03836	5.82443	0.143681	31.7086	1.98604	0.0477943	0.896525	0.915
55.2615	0.04428	3.982	5.8195	0.142135	32.1285	1.78129	0.019845	0.909275	0.913
54.305	0.02081	4.068	5.7155	0.085625	32.319	2.09178	0.01759	0.90285	0.94
54.6535	0.01699	3.904	5.894	0.07991	32.834	1.49479	0.027615	0.89125	0.937
54.5255	0.01949	3.976	5.789	0.08805	32.375	1.934	0.02577	0.86289	0.935
54.9175	0.0364	4.248	5.993	0.14762	32.455	1.79736	0.03029	1.00988	0.931
54.4995	0.038475	3.9955	5.855	0.142485	32.045	2.27921	0.037935	0.92953	0.935
54.4725	0.03595	3.94225	5.72225	0.117513	32.228	1.81293	0.0344675	0.940435	0.931
54.6765	0.0210289	3.78461	5.52144	0.148939	31.9566	2.5187	0.0997139	0.835062	0.937
55.211	0.0542	3.55378	5.897	0.139035	32.4225	1.8359	0.03671	0.857185	0.923
54.2125	0.027975	3.9225	5.915	0.133785	32.0715	1.98723	0.02309	0.963405	0.935
55.3789	0.0468722	3.97889	5.85167	0.117594	32.3683	2.00673	0.01725	0.892767	0.921
54.6866	0.0514047	4.25544	5.68815	0.0880874	32.3015	1.8423	0.0118698	0.917542	0.928
54.686	0.040165	4.0335	5.9865	0.116185	32.367	1.42741	0.00605	0.90483	0.922
54.8185	0.04079	4.222	5.7745	0.10089	31.9585	2.28043	0.039265	0.92967	0.926
55.2098	0.0316779	4.11132	5.99496	0.146473	32.637	1.79079	0.0220408	0.898505	0.928
55.5925	0.02315	3.8645	6.027	0.14504	32.5875	1.7006	0.02143	0.812	0.917
55.2175	0.019775	4.125	6.0085	0.099935	32.21	2.24396	0.02015	0.974	0.925
55.2245	0.02501	3.50974	6.0725	0.136725	32.143	1.47045	0.029755	0.709195	0.906
54.9485	0.05166	3.8905	6.081	0.095965	32.752	1.95064	0.02225	0.792225	0.937
54.4588	0.0503294	3.87442	5.70461	0.0983467	32.8748	2.42734	0.0328903	0.861649	0.961
55.0718	0.0263249	3.83028	5.81608	0.134624	32.1613	2.20003	0.0173466	0.851578	0.924
55.0965	0.0320997	4.03762	5.86489	0.127752	31.8383	2.36574	0.0211799	0.934894	0.916
55.54	0.06	3.03	5.67	0.15	33.08	1.61	0.04	0.78	0.931
55.75	0.01	2.33	4.96	0.16	34.51	1.92	0.26	0.73	0.989
56.62	0	2.56	5.07	0.11	33.63	1.9	0.02	0.88	0.933
55.41	0.01	2.85	5.15	0.11	33.97	1.56	0.06	0.77	0.958
55.62	0.03	2.65	5.45	0.13	32.6	2.17	0	0.87	0.925
55.52	0.03	3.27	5.72	0.115	32.62	1.5525	0.005	0.835	0.915
55.6033	0.0366667	2.69333	5.45333	0.11	32.5067	2.21667	0.00666667	0.933333	0.925
55.8025	0.03	2.53	5.5175	0.145	32.855	1.7075	0.005	0.8625	0.921
55.26	0.04	3.195	6.04	0.115	32.275	1.77	0.01	0.96	0.916
55.31	0.02	2.96	5.41	0.16	31.93	2.75	0.01	0.99	0.925
56.06	0.0166667	2.63667	5.69	0.133333	32.9767	1.59	0	0.793333	0.916
55.94	0.0233333	2.52	5.75333	0.133333	32.8933	1.39	0.0133333	0.846667	0.914
55.795	0.025	2.715	5.89	0.145	32.795	1.64	0.005	0.82	0.917
55.46	0.03	2.805	5.64	0.125	32.37	2.13	0.01	1.005	0.923
55.82	0.0233333	2.61	5.45333	0.136667	32.9767	1.56667	0	0.826667	0.92
55.3567	0.0433333	3.06	5.81667	0.13	32.3967	1.84333	0.0166667	0.91	0.919
56.05	0.02	2.54	5.34	0.13	32.69	2.44	0	0.91	0.926
55.945	0.015	2.235	5.635	0.13	32.885	1.865	0.005	0.89	0.922
56.075	0.005	2.545	5.515	0.15	32.9	2.05	0	0.85	0.923
55.4867	0.0333333	2.9	5.85333	0.13	32.5033	1.77333	0.0166667	0.913333	0.919
56.05	0.01	2.675	5.5	0.135	32.915	2.1	0	0.88	0.925
56.15	0.01	2.8	5.475	0.13	32.39	2.44	0	1.02	0.917
55.45	0.03	2.79	5.72	0.14	32.55	1.82	0.01	0.94	0.922
56.49	0.015	2.89	5.39	0.125	32.675	2.165	0	0.93	0.915
56.375	0.025	2.615	5.845	0.14	32.795	1.61	0.005	0.89	0.909
56.1033	0.0333333	2.27333	5.63	0.15	33.0333	1.69333	0.00666667	0.776667	0.919
56.17	0.03	2.43	5.57	0.14	33.45	1.03	0.01	0.85	0.919
55.59	0.045	2.795	5.81	0.13	32.875	1.485	0.03	0.835	0.922
55.64	0.01	2.775	5.38	0.08	32.84	2.22	0	0.87	0.932
55.88	0.02	2.47	5.43	0.075	33.04	1.925	0	0.78	0.926
56.42	0.04	2.94	5.59	0.12	32.89	1.76	0.02	0.87	0.913
55.485	0.035	2.79	5.69	0.16	32.67	1.69	0.01	0.92	0.926
55.655	0	2.82	5.375	0.08	32.555	2.41	0.01	0.88	0.928
55.505	0	2.81	5.39	0.09	32.995	1.845	0.005	0.855	0.932
55.855	0.02	2.76	5.38	0.13	32.885	2.205	0.02	0.88	0.931
55.71	0.02	2.285	5.335	0.12	32.86	2.315	0.025	0.87	0.935
56.375	0.055	2.35	5.36	0.115	32.91	2.06	0.085	0.89	0.924
56.1767	0.05	2.57	5.62	0.133333	32.7533	1.73	0.0466667	0.853333	0.914
56.05	0.0166667	2.22	5.72	0.15	32.7667	1.78667	0.0133333	0.866667	0.916
54.89	0.05	3.8	5.38	0.09	31.05	3.86	0.06	1.09	0.933
56.56	0.07	3.2	6.96	0.1	31.01	1.54	0	0.93	0.92
54.49	0.04	4.5	6.01	0.12	31.76	2.26	0.01	0.94	0.928
54.62	0.05	4.64	5.96	0.13	31.61	2.54	0.01	0.96	0.924
55.71	0.03	2.31	5.42	0.11	33.82	1.82	0.03	1.1	0.956
55.32	0.02	3.73	6	0.12	32.87	1.23	0.01	1.11	0.924
55.12	0.03	3.27	6.58	0.12	33.52	1.12	0.14	0.91	0.95
55.14	0.04	4.26	6.05	0.14	33.11	1.16	0.03	0.91	0.932
54.58	0.11	5.2	6.16	0.12	33	1.36		0.97	0.941
54.74	0.06	4.53	5.84	0.13	32.71	1.1	0.03	0.99	0.927
54.6	0.04	5.08	6.14	0.12	32.52	0.96	0.03	0.89	0.92
55.22	0.05	4.13	6.34	0.11	33.1	0.87	0.04	0.93	0.925
54.47	0.04	4.93	6.36	0.15	33.19	0.99	0.04	0.81	0.942
54.24	0.04	4.22	6.36	0.12	31.85	1.68	0.16	0.96	0.931
54.3	0.04	4.33	6.07	0.14	32.25	1.24	0	0.83	0.92
54.9	0.08	4.32	6.18	0.16	33.44	0.76	0.02	0.81	0.936
55.07	0.05	4.4	5.77	0.12	32.79	1.01	0.01	1.03	0.921
53.98	0.04	4.64	6.12	0.15	32.64	1.33	0.03	0.89	0.942
54.17	0.05	4.77	6.2	0.13	31.65	2.41	0.01	0.98	0.931
54.43	0.05	4.69	6.3	0.12	32.04	1.94	0.01	0.94	0.927
56.23	0.03	3.58	5.84	0.12	33.27	1.19	0.02	0.84	0.916
54.96	0.06	4.48	6.3	0.13	32.1	1.43	0.01	0.94	0.91
54.1	0.14	4.58	6.21	0.13	31.87	2.21	0.02	1	0.935
54.9	0.07	5.24	6.1	0.13	32.57	1.2	0.03	0.8	0.92
53.89	0.07	5.28	6.56	0.15	31.76	1.58	0.02	0.77	0.921
54.63	0.07	5.62	6.2	0.14	31.92	1.2	0.02	0.88	0.907
53.48	0.07	4.94	6.29	0.15	32.32	1.23	0.01	0.78	0.937
54.5	0.08	5.57	6.32	0.14	32.72	1.38	0.05	0.79	0.936
54.7	0.08	5.51	6.04	0.16	32.32	1.07	0.06	0.84	0.917
55.16	0.1	4.49	6	0.12	32.52	1.14	0.03	0.76	0.912
52.95	0.15	5.94	5.91	0.11	30.74	2.6	0.09	0.95	0.935
54.06	0.1	5.39	6.18	0.13	31.85	1.62	0.03	0.72	0.921
54.59	0.06	5.32	6.08	0.12	32.9	0.63	0.05	0.84	0.926
54.51	0.08	5.17	5.8	0.12	32	1.57	0.06	0.88	0.92
54.14	0.1	5.83	6.23	0.12	32.14	0.66	0.1	0.77	0.915
55.14	0.08	4.95	6.05	0.11	32.85	0.99	0.09	0.71	0.922
54.16	0.11	5.59	6.26	0.15	32.15	1.4	0.07	0.81	0.928
54.76	0.06	5.44	6.35	0.13	32.42	1.13	0.06	0.66	0.917
54.9	0.09	5.31	6.41	0.12	31.87	1.45	0.07	0.6	0.904
54.82	0.05	5.19	6.3	0.15	32.27	1.19	0.02	0.62	0.91
54.55	0.05	4.57	6.24	0.16	32.41	1.09	0.03	0.9	0.921
55.23	0.07	4.42	6.03	0.15	32.58	1.08	0.01	0.86	0.912
53.74	0.05	4.44	5.91	0.13	31.49	1.99	0.04	0.87	0.926
54.46	0.05	4.94	6.36	0.15	32.79	0.7	0.05	0.93	0.928
54.83	0.04	4.41	6.12	0.16	33.22	0.99	0.01	0.86	0.935
54.88	0.03	4.23	6.5	0.15	32.71	1	0	0.85	0.919
55.22	0.05	4.96	6.18	0.17	33.27	0.65	0	0.66	0.92
54.72	0.08	5.18	6.47	0.16	32.57	1.33	0.04	0.63	0.924
54.99	0.12	5.55	6.43	0.08	32.12	1.01	0.06	0.79	0.903
53.9	0.08	5.73	6.31	0.16	32.14	1	0.01	0.85	0.921
54.08	0.06	5.81	6.6	0.16	32.25	0.62	0.02	0.73	0.913
54.56	0.09	5.57	6.13	0.12	31.74	1.56	0.07	0.8	0.911
54.7	0.08	5.34	6.42	0.15	32.36	0.81	0.02	0.72	0.909
54.68	0.07	4.44	6.47	0.12	32.26	0.66	0.01	0.85	0.904
54.59	0.06	4.45	6.16	0.14	32.34	1.56	0.02	0.83	0.925
54.03	0.07	4.97	7.05	0.14	31.93	1.44	0.03	1.02	0.925
54.54	0.07	4.85	5.97	0.12	33.01	1.07	0.01	0.93	0.936
54.3	0.04	4.57	6.23	0.13	32.24	1.46	0.01	0.91	0.926
55.1	0.03	4.61	6.16	0.12	32.19	1.06	0.01	0.88	0.903
55.01	0.03	4.83	6.43	0.14	32.61	0.79	0.02	0.93	0.913
54.42	0.04	4.64	6.41	0.13	32.75	0.72	0.01	0.9	0.924
54.6	0.06	4.71	6.21	0.12	32.36	1.17	0.02	0.85	0.918
54.51	0.07	5	5.99	0.12	32.58	1.1	0.01	0.88	0.925
55.01	0.05	4.37	6.18	0.08	32.86	1.23	0.01	0.83	0.925
54.86	0.08	4.87	6.19	0.15	32.4	1.24	0.02	0.79	0.916
54.69	0.06	4.73	6.2	0.12	32.52	1.14	0.02	0.77	0.92
54.92	0.06	4.79	6.17	0.13	32.51	1.11	0.03	0.92	0.918
55.74	0.05	3.44	5.63	0.12	33.17	1.26	0	0.87	0.922
54.99	0.04	3.63	6.02	0.11	32.83	1.4	0.02	0.98	0.931
56.01	0.04	3.12	6.43	0.17	32.65	1.35	0.01	0.72	0.904
54.72	0.12	4.08	6.25	0.13	30.91	2.57	0.03	0.99	0.904
54.35	0.05	3.7	6.15	0.09	32.72	1.89	0.03	0.85	0.947
55.19	0.03	4.21	5.98	0.16	32.71	1.49	0.03	0.78	0.924
55.3	0.05	4.09	6.13	0.13	32.72	1.2	0.02	0.9	0.918
54.51	0.03	4.3	6.12	0.09	33.09	0.81	0.01	0.87	0.933
54.29	0.06	4.88	6.38	0.14	32.9	0.87	0.02	0.99	0.936
54.54	0.05	4.61	6.12	0.17	32.72	1.21	0.01	0.95	0.932
54.45	0.05	5.13	6.28	0.19	32.28	1.02	0.03	0.86	0.918
54.63	0.06	5.23	6.41	0.14	32.16	0.96	0.01	0.92	0.909
54.97	0.06	4.74	6.05	0.13	32.01	1.3	0.02	0.74	0.904
54.43	0.06	4.85	6.38	0.12	32.35	1.21	0.02	0.86	0.922
54.33	0.09	4.88	6.15	0.11	31.64	2.07	0.03	0.86	0.92
54.72	0.06	4.71	6.37	0.12	32.42	0.83	0.02	0.94	0.913
54.84	0.06	3.99	6.42	0.16	33.71	0.88	0.04	0.85	0.949
54.27	0.05	4.78	6.15	0.12	32.77	1.13	0.01	0.9	0.935
54	0.03	4.24	5.72	0.11	32.9	1.16	0.01	0.97	0.945
55.26	0.03	3.64	6.02	0.13	33.12	1.22	0.02	0.97	0.931
54.7	0.08	3.96	6.13	0.11	33.02	1.46	0.02	0.73	0.939
54.96	0.07	4.39	5.94	0.08	32.87	1.15	0.02	0.83	0.925
54.99	0.06	4.48	6.23	0.1	32.84	1.15	0	0.84	0.923
55.29	0.05	4.96	6.21	0.1	32.57	0.84	0	0.76	0.903
54.36	0.11	5.31	5.83	0.11	30.74	2.58	0.02	0.9	0.903
54.78	0.04	4.38	6.3	0.07	32.99	0.95	0.04	0.76	0.928
57	0.21	6.46	7.05	0.27	34.69	3.86		1.17687	0.995
52.95	0	1.94	4.8	0	30.55	0.62		0.22	0.903

## Sheet: Cpx
SiO2	TiO2	Al2O3	FeO	MnO	MgO	CaO	Na2O	Cr2O3	Mg#
50.61	0.63	7.87	2.94	0.09	16.19	19.52	0.89	1.2	0.956
53.58	0.01	2.7	2.36	0.09	18.04	23.27	0.05	0.87	0.971
52.033	0.048	3.41	2.877	0.057	17.372	21.172	0.563	1.307	0.992
52.2667	0.0166667	2.96	2.69	0.0966667	17.9	22.7	0	1.24	0.992
52.6333	0.02	2.75333	2.91	0.103333	18.1667	22.3	0.00333333	1.08667	0.974
52.3	0.04	3.16	2.73	0.1	17.7	21.9	0.35	1.2	0.997
51.9	0.343333	2.82	2.8	0.106667	18.4667	21.9	0.00333333	1.12333	1
52.25	0.025	3.14	3.12	0.105	19.4	20.3	0	1.305	0.984
52.7	0.03	2.865	2.65	0.085	18.9	21.8	0.035	1.16	0.998
52.4	0.03	2.77333	2.48	0.09	18.5	22.9333	0.02	1.15667	1
53.25	0.03	2.975	2.545	0.085	18.35	22.45	0.015	1.17	0.971
53.55	0.04	2.885	2.57	0.085	18.35	22.5	0.01	1.15	0.962
52.9	0.03	2.93	2.95	0.07	19.4	20.9	0.11	1.26	0.996
53.06	0.13	3.12	2.78	0.15	18.98	21.14	0	1.34	0.968
53.46	0.03	2.28	2.38	0	17.07	23.46	0	1.19	0.929
51.87	0.08	4.63	2.85	0.08	17.34	20.54	0.03	1.35	0.915
51.17	0.1	4.38	2.85	0.09	17.94	21.3	0.03	1.36	0.987
52.12	0.08	4.33	3.03	0.09	18.03	21.16	0.04	1.32	0.953
50.78	0.02	4.44	2.72	0.09	17.49	22.76	0.11	1.38	1
51.28	0	4.96	3.44	0.1	18.67	19.72	0.15	0.8	0.964
51.41	0	4.9	3.45	0.1	18.81	19.33	0.15	1.03	0.959
52.05	0.06	4.02	3.09	0.09	17.98	21.26	0.37	1.28	1
50.97	0.18	5.45	2.47	0.09	16.58	22.01	0.6	1.55	1
51.28	0.05	5.34	2.28	0.09	17.64	20.97	0.3	0.7	0.973
50.59	0.13	6.06	2.74	0.11	16.53	22.5	0.3	1.34	1
51.18	0.18	5.17	2.45	0.09	16.83	22.35	0.56	1.5	1
51.14	0.07	4.73	2.52	0.1	17.24	22.94	0.07	1.34	1
50.28	0.1	5.03	2.51	0.08	17	22.24	0.1	1.43	1
52.59	0.09	3.81	2.19	0.1	17.43	21.76	0.66	1.54	1
51.86	0	5.56	3.1	0.04	17.96	19.99	0.23	0.81	0.927
51.98	0	5.4	2.96	0.08	17.62	20.36	0.28	0.87	0.927
52.34	0.02	5.54	2.95	0	17.8	20.51	0.25	0.93	0.925
51.47	0.14	4.57	2.35	0.09	16.42	22.19	0.5	1.37	0.995
51.68	0.13	4.32	2.19	0.09	16.53	22.35	0.52	1.36	1
51.64	0.15	4.51	2.17	0.08	16.49	22.23	0.6	1.33	1
51.11	0.11	5.37	2.66	0.08	16.65	20.88	0.61	1.54	0.989
49.9	0.35	6.39	2.95	0.13	16.6	22.4	0.5	0.91	1
52.8	0.195	4.65	2.72	0.035	17.3	22.6	0.145	0.615	0.93
49.5	0.19	6.35	3.47	0.12	16.6	22.3	0.09	1.2	1
53.8	0.15	3.55	2.57	0.07	16.8	21.1	1.14	1.68	0.98
50.2	0.22	6.34	2.79	0.13	15.6	23.3	0.16	1.33	0.99
52.87	0.03	2.67	2.34	0.1	17.83	22.45		1.1	0.95
52.49	0.05	2.8	2.23	0.07	17.4	22.85		1.11	0.95
53.08	0.07	2.34	2.22	0.1	17.62	23.31		1.1	0.96
53.54	0.04	2.11	2.16	0.11	18.02	23.48		0.69	0.967
52.63	0.05	2.23	1.95	0.09	17.25	24		0.87	0.983
53.68	0.04	2.04	1.98	0.07	17.74	24.19		0.81	0.977
53.16	0.78	2.3	3.22	0.11	17.92	22.29	0.31	0.11	0.957
52.57	0.01	4.48	2.62	0.08	17	22.98	0.04	1.21	0.946
53.44	0.73	2.96	2.76	0.07	17.66	21.59	0.42	1.06	0.947
51.87	0.14	3.72	2.67	0.13	16.97	22.57	0.38	1.46	1
53.6	0.03	3.05	2.63	0.11	17.26	22.92	0.23	1.15	0.947
51.38	0.11	5.74	3.38	0.08	17.37	20.63	0.06	1.22	0.924
52.04	0.09	4.87	2.88	0.1	16.03	22.89	0.11	1.16	0.916
50.64	0.09	5.76	3.44	0.1	16.5	20.98	0.09	1.18	0.917
52.26	0.09	4.78	2.8	0.13	16.8	22.17	0.09	1.29	0.926
50.32	0.3	7.02	3.04	0.1	16.11	21.24	0.28	1.15	0.942
50.27	0.26	6.58	2.53	0.07	14.97	23.02	0.4	1.16	0.966
50.95	0.21	6.25	3.17	0.1	16.74	20.56	0.33	1.12	0.935
50.74	0.25	6.62	2.73	0.08	15.32	22.2	0.39	1.14	0.932
50.64	0.21	6.59	3.11	0.08	17.74	19.59	0.35	1.08	0.966
50.45	0.22	5.7	2.55	0.12	15.41	22.44	0.44	1.39	0.977
51.67	0.29	6.12	2.58	0.09	15.81	22.04	0.51	1.38	0.945
51.02	0.26	6.85	3.28	0.1	16	21.32	0.3	1.15	0.916
50.44	0.24	6.41	2.73	0.09	16.04	22.39	0.37	1.19	0.996
51.18	0.25	5.3	2.48	0.08	16.07	22.24	0.39	1.14	0.962
52.35	0.11	4.28	3.04	0.1	18.08	19.81	0.17	1.47	0.922
52.18	0.16	3.83	2.44	0.07	16.93	22.12	0.11	1.19	0.933
50.63	0.14	5.53	3.1	0.12	16.79	21.41	0.17	1.18	0.963
51.69	0.16	4.74	2.82	0.11	17.12	22.34	0.25	1.09	0.987
51.36	0.16	5.07	3.01	0.11	17.19	21.8	0.27	1.34	0.992
50.91	0.1	5.4	3.1	0.1	17.33	21.54	0.03	1.12	0.965
50.49	0.1	5.8	3.05	0.1	17.09	21.82	0.15	1.25	1
51.03	0.15	5.23	2.89	0.1	16.44	22.25	0.17	1.08	0.957
51.1	0.14	5.24	3.04	0.12	16.62	21.85	0.17	1.17	0.953
50.85	0.16	5.4	3.17	0.12	16.7	21.24	0.21	1.27	0.95
50.72	0.16	5.39	2.96	0.12	16.36	22.15	0.21	1.2	0.97
50.52	0.14	5.45	3.06	0.14	16.52	21.73	0.24	1.31	0.978
50.85	0.11	5.5	3.1	0.15	17.21	21.6	0.12	1.24	0.981
51.4	0.08	4.96	3.05	0.08	17.79	21.47	0.24	1.37	1
50.83	0.11	4.65	2.65	0.09	17.95	21.57	0.1	1.15	1
51.71	0.11	5.11	2.67	0.1	17.93	20.78	0.08	1.28	0.953
51.39	0.09	4.97	2.55	0.09	16.88	22.66	0.06	1.22	0.974
51.72	0.09	4.96	2.73	0.1	17.62	21.84	0.06	1.19	0.97
52.16	0.08	4.29	2.61	0.09	17.61	22.33	0.06	0.98	0.966
51.59	0.1	4.94	2.7	0.1	17.4	21.7	0.1	1.17	0.962
51.56	0.09	5.17	2.76	0.09	17.38	21.75	0.07	1.25	0.962
51.75	0.12	4.84	2.31	0.08	16.22	23.51	0.07	1.21	0.956
53.14	0.1	3.72	2.21	0.13	17.04	23.96	0.04	1.01	0.961
51.94	0.1	4.82	2.65	0.08	17.21	22.34	0.08	1.21	0.961
51.25	0.1	4.87	2.39	0.08	15.91	23.36	0.06	1.18	0.948
52.28	0.09	4.41	2.48	0.08	17.03	22.89	0.07	0.99	0.953
52.04	0.1	4.91	2.45	0.09	16.48	23.26	0.07	1.15	0.949
51.84	0.1	4.69	2.44	0.09	16.71	23.14	0.06	1.08	0.962
51.83	0.1	4.43	2.55	0.1	16.97	22.59	0.07	1.01	0.955
51.52	0.11	4.72	2.45	0.09	16.49	22.8	0.09	1.12	0.953
50.94	0.12	4.76	2.55	0.09	16.42	22.75	0.06	1.24	0.968
51.46	0.12	5.14	2.88	0.09	16.65	22.55	0.08	1.11	0.953
50.76	0.13	5.15	2.46	0.09	16.05	23.21	0.07	1.36	0.977
51.33	0.1	5.01	2.49	0.08	16.38	23.2	0.08	1.28	0.973
51.53	0.09	4.73	2.35	0.03	16.5	23.29	0.07	1.18	0.97
50.82	0.12	4.72	2.4	0.09	16.34	23.06	0.08	1.15	0.97
51.89	0.06	4.69	2.46	0.08	17.14	22.84	0.07	1.11	0.981
51.27	0.09	4.84	2.29	0.03	16.32	23.55	0.05	1.2	0.974
51.66	0.06	5.17	2.64	0.1	16.65	22.7	0.06	1.28	0.977
51.78	0.21	4.45	2.49	0.08	16.5	23.09	0.16	1.38	0.954
51.27	0.1	5.21	3.01	0.09	17.79	21.03	0.07	1.26	0.973
50.89	0.1	4.9	2.62	0.09	17.58	21.43	0.08	1.2	0.967
51.39	0.08	5.05	2.71	0.09	17.78	21.23	0.06	1.2	0.985
51.88	0.1	4.36	2.11	0.09	17.2	23.1	0.08	1.04	0.988
51.51	0.445	5.09	2.935	0.1	18.12	20.675	0.07	1.22	0.963
51.57	0.12	5.01	3.11	0.1	18.07	20.58	0.1	1.27	0.96
50.96	0.11	5.04	2.87	0.1	17.6	21.42	0.08	1.23	0.985
51.33	0.1	5.155	3.015	0.09	17.67	21.26	0.08	1.25	0.968
51.62	0.1	4.91	2.84	0.09	17.75	20.84	0.07	1.17	0.944
51.035	0.09	5.005	2.915	0.095	17.72	21.29	0.07	1.155	0.944
51.32	0.09	4.89	2.89	0.09	17.58	21.54	0.08	1.18	0.973
51	0.14	5.27	2.81	0.08	17.27	21.56	0.08	1.3	0.971
51.32	0.09	5.05	2.68	0.09	17.82	21.78	0.07	1.22	0.995
51.44	0.1	4.84	2.45	0.09	17.53	21.65	0.11	1.18	0.975
51.4	0.11	5.6	2.88	0.1	17.58	21.08	0.07	1.21	0.953
51.66	0.09	5.4	3.28	0.11	18.41	19.88	0.06	1.28	0.945
52.17	0.13	4.9	2.12	0.1	16.3	23.85	0.1	1.29	0.966
50.72	0.15	5.35	2.25	0.09	15.97	23.27	0.03	1.4	0.971
52.26	0.12	4.63	2.22	0.08	16.63	23.41	0.09	1.16	0.959
52.21	0.11	4.5	2.32	0.09	16.75	23.33	0.07	1.08	0.959
52.33	0.12	4.73	2.17	0.08	16.43	23.53	0.13	1.26	0.958
52.31	0.12	3.97	2.22	0.08	16.59	23.51	0.1	0.96	0.954
52.08	0.13	4.6	2.17	0.09	16.51	23.41	0.1	1.17	0.96
51.82	0.09	4.83	2.73	0.08	16.94	22.47	0.1	1.16	0.957
52.01	0.1	4.77	2.65	0.09	17.05	22.66	0.07	1.08	0.957
51.67	0.09	4.69	2.75	0.1	17.02	22.48	0.08	1.13	0.964
51.86	0.12	4.69	2.78	0.1	17.05	22.45	0.11	1.11	0.961
51.95	0.1	4.93	2.84	0.09	17.58	21.31	0.08	1.15	0.941
51.85	0.11	4.5	2.59	0.09	17.15	22.46	0.08	0.99	0.96
51.87	0.1	4.89	2.73	0.1	17.34	22.31	0.1	1.16	0.972
51.4	0.17	5.24	2.38	0.07	16.06	23.59	0.11	1.28	0.971
51.59	0.12	5.02	2.39	0.08	16.54	23.72	0.21	1.28	1
51.71	0.1	4.47	2.33	0.07	16.78	23.08	0.08	1.02	0.969
51.85	0.11	4.67	2.64	0.1	16.94	22.25	0.11	1.06	0.947
50.92	0.11	4.89	2.58	0.08	16.21	23.5	0.11	1.19	0.993
51.74	0.12	4.59	2.59	0.1	16.64	22.72	0.08	1.11	0.949
51.32	0.09	4.9	2.35	0.09	16.14	23.73	0.07	1.32	0.981
51.4	0.1	4.78	2.51	0.06	16.82	22.49	0.09	1.2	0.965
51.45	0.11	4.89	2.78	0.1	17.28	21.96	0.09	1.24	0.971
50.66	0.12	5.01	2.38	0.09	16.02	23.5	0.08	1.33	0.993
51.24	0.11	4.47	2.47	0.09	16.35	23.24	0.09	1.14	0.974
51.25	0.1	4.62	2.75	0.09	17	22.26	0.05	1.44	0.974
52.11	0.09	4.27	2.54	0.08	16.73	22.81	0.05	1.32	0.945
51.6	0.12	4.1	2.36	0.08	16.76	22.99	0.07	1.33	0.977
51.66	0.09	4.34	2.73	0.09	17.14	22.14	0.07	1.19	0.958
51.79	0.1	4.76	2.87	0.09	17.27	21.76	0.06	1.37	0.95
51.13	0.09	4.48	2.73	0.1	16.71	22.44	0.07	1.22	0.966
51.77	0.09	4.38	2.76	0.1	17.28	21.77	0.06	1.19	0.947
51.63	0.11	4.6	2.62	0.08	16.07	23.23	0.17	1.32	0.959
51.4096	0.0982847	4.66306	2.57286	0.0937833	16.6792	23.2892	0.112831	1.35941	0.99
50.763	0.104565	5.0405	2.49782	0.077335	16.079	23.7845	0.049025	1.43239	1
51.28	0.25	7.08	2.95	0.08	15.43	20.99	1.14	1.31	0.988
51.1	0.26	6.69	2.72	0.1	15.61	22.38	0.72	0.98	0.991
50.92	0.31	6.93	2.98	0.11	15.25	22.08	0.69	1.04	0.96
50.98	0.23	6.91	2.94	0.1	15.31	21.45	0.74	1.08	0.943
50.98	0.14	4.14	2.37	0.09	15.98	23.23	0.09	1.15	0.962
51.36	0.18	5.63	2.37	0.07	16.03	23.65	0.16	1.36	0.985
50.51	0.16	5.69	2.39	0.09	16.5	21.89	0.12	1.43	0.968
51.68	0.12	5.41	2.49	0.1	16.12	23.31	0.05	1.44	0.95
50.95	0.11	5.76	2.67	0.09	16.44	23.28	0.15	1.41	1
50.93	0.11	5.19	2.59	0.08	16.12	22.89	0.15	1.29	0.971
51.38	0.23	6.62	2.45	0.09	15.56	23.05	0.58	1.09	0.989
50.62	0.2	6.78	3.02	0.09	15.84	21.97	0.39	1.11	0.959
51.58	0.22	6.96	3.5	0.11	15.85	22.31	0.35	1.03	0.929
50.22	0.22	6.93	2.6	0.11	14.91	22.64	0.53	1.14	0.967
50.55	0.21	6.83	2.48	0.11	14.8	23.39	0.32	1.02	0.944
50.99	0.19	6.99	2.81	0.07	15.35	22.45	0.47	1.14	0.947
50.74	0.24	6.89	2.54	0.08	15.12	22.71	0.5	1.13	0.95
52.31	0.14	4.8	2.36	0.09	16.05	22.32	0.57	1.66	0.958
50.29	0.31	6.1	2.72	0.04	15.73	23.12	0.3	1.38	0.965
51.54	0.14	5.4	2.71	0.09	16.87	22.45	0.21	1.23	1
51.53	0.26	5.47	3.06	0.1	17.36	21.07	0.3	1.47	0.981
49.43	0.16	6.13	2.33	0.1	15.16	23.56	0.34	1.47	0.974
50.21	0.14	5.67	2.58	0.1	15.97	22.96	0.13	1.33	1
51.07	0.13	4.65	2.33	0.08	16.26	23.3	0.12	1.12	0.992
50.9	0.11	5.93	2.88	0.09	16.36	22.35	0.15	1.35	0.981
51.36	0.13	5.4	2.57	0.1	16.21	23.45	0.11	1.33	0.966
50.89	0.16	5.85	2.69	0.09	15.54	23.33	0.23	1.18	0.979
50.74	0.18	5.91	2.71	0.12	15.35	23.02	0.24	1.27	0.965
51.86	0.16	5.19	3.13	0.05	17.67	21.47	0.18	1.16	0.951
50.59	0.14	5.89	2.66	0.1	15.81	23.05	0.18	1.25	0.966
50.92	0.17	5.78	2.66	0.08	15.58	23.05	0.22	1.22	0.976
50.86	0.14	5.78	2.63	0.11	15.75	23.36	0.18	1.27	0.954
50.48	0.2	6.55	2.87	0.08	15.96	22.43	0.19	1.21	0.976
51.65	0.1	4.88	2.9	0.13	16.59	22.04	0.01	1.46	0.963
51.14	0.07	4.69	3.05	0.1	17.33	21.98	0.03	1.49	0.924
51.28	0.07	4.58	3.02	0.08	16.08	23.06	0.04	1.45	0.985
50.61	0.28	5.14	2.91	0.09	16.17	22.56	0.18	1.35	0.95
50.36	0.3	5.92	2.77	0.06	15.35	23.93	0.17	1.27	0.979
49.85	0.3	5.85	3.04	0.02	16.18	22.63	0.16	1.32	0.994
49.69	0.27	5.56	3.03	0.05	16.19	22.71	0.18	1.4	1
50.72	0.08	4.78	2.76	0.07	16.81	22.57	0.14	1.37	1
51.46	0.12	5.58	2.76	0.11	16.41	23.15	0.15	1.23	0.977
51.09	0.08	5.31	3.01	0.11	16.45	22.73	0.14	1.42	0.98
50.45	0.13	5.57	2.45	0.02	15.99	23.25	0.25	1.36	1
50.87	0.14	5.7	2.85	0.11	16.13	23.03	0.26	1.4	1
50.75	0.19	6.18	2.78	0.1	15.66	22.89	0.15	1.38	0.954
51.15	0.17	5.53	2.53	0.1	15.94	22.77	0.39	1.04	0.976
51.03	0.16	6.49	2.56	0.06	15.51	23.12	0.34	1.28	0.968
51.14	0.19	6.47	2.54	0.09	15.22	23	0.33	1.17	0.937
50.54	0.16	6.06	2.72	0.09	15.91	23.2	0.28	1.31	1
50.7	0.15	6.19	2.5	0.08	15.5	23.4	0.27	1.22	0.98
50.95	0.15	5.77	2.4	0.09	15.45	23.25	0.21	1.24	0.953
51.44	0.12	5.07	2.14	0.07	16.2	23.21	0.32	1.49	1
50.96	0.15	5.63	2.44	0.07	15.99	23.11	0.16	1.32	0.974
50.95	0.17	5.13	2.14	0.08	16.56	23.42	0.2	1.35	1
52.1	0.07	4.5	2.67	0.08	17.13	22.51	0.02	1.36	0.953
50.17	0.19	5.72	3.53	0.06	19.39	18	0.31	1.41	1
52.71	0.31	3.8	2.23	0.02	16.33	23.17	0.24	1.26	0.938
50.62	0.29	5.97	2.16	0.05	15.76	22.79	0.49	1.69	1
52.53	0.2	4.51	2.32	0.06	16.51	23.89	0.27	0.92	0.979
52.46	0.19	4.29	2.39	0.09	16.3	23.36	0.28	0.8	0.945
50.25	0.2	6.42	2.68	0.1	15.66	22.98	0.21	1.17	0.98
50.56	0.15	5.69	2.39	0.04	15.61	23.97	0.24	1.28	1
50.99	0.26	5.8	2.33	0.06	15.37	23.17	0.31	1.19	0.955
51.24	0.18	6.16	2.54	0.09	15.4	23.38	0.32	1.18	0.958
52.1	0.17	5.23	2.22	0.1	15.87	23.1	0.33	1.19	0.944
51.93	0.22	5.17	2.32	0.08	16.09	23.75	0.32	1.2	0.989
51.16	0.18	5.39	2.41	0.06	15.93	22.4	0.27	1.34	0.949
51.07	0.2	5.51	2.44	0.06	15.98	23.24	0.35	1.51	1
50.59	0.2	6.79	2.34	0.06	15.22	23.12	0.33	1.41	0.97
50.9	0.14	5.65	2.43	0.07	15.76	23.58	0.19	1.21	0.983
52.62	0.28	3.07	1.94	0.06	16.53	23.07	0.24	0.62	1
51.04	0.08	4.6	2.95	0.08	17.48	22.36	0.03	1.27	0.987
51.4	0.14	6	2.82	0.14	15.8	23.2	0.12	1.23	1
50.83	0.13	5.58	3.06	0.1	17.07	22.03	0.06	1.46	0.989
50.41	0.11	5.32	3.27	0.11	17.76	20.99	0.06	1.44	0.981
50.16	0.09	5.37	2.75	0.09	16.27	22.52	0.08	1.45	0.99
51.16	0.09	5.33	3.43	0.12	18.78	19.75	0.07	1.39	0.986
50.68	0.12	5.32	2.7	0.09	16.55	22.44	0.13	1.45	0.973
51.15	0.07	5.28	3.15	0.1	17.71	21.27	0.1	1.44	0.981
51.02	0.09	5.36	3.09	0.11	17.18	21.63	0.08	1.44	1
50.74	0.12	5.67	2.9	0.09	16.39	22.58	0.12	1.42	1
50.71	0.11	5.09	3.49	0.1	18.23	19.96	0.11	1.56	0.985
50.84	0.11	5.43	3.04	0.1	17.01	21.84	0.05	1.41	0.973
50.97	0.11	4.97	3.11	0.11	16.32	22.95	0.07	1.41	0.976
50.74	0.08	5.05	2.96	0.09	16.61	22.69	0.05	1.52	0.991
51.69	0.13	4.83	3.51	0.06	20.28	18.4	0.04	1.44	0.987
50.98	0.1	5.19	3.04	0.1	17.05	22.2	0.04	1.47	0.985
51.17	0.09	4.76	3.03	0.1	17.63	21.49	0.06	1.45	0.984
51.15	0.19	6.2	2.75	0.11	16.14	21.83	0.49	1.39	0.975
51.26	0.2	5.79	2.73	0.09	16.07	21.69	0.64	1.6	0.989
51.83	0.19	6.36	3.17	0.1	17.38	20.12	0.46	1.21	0.943
51.09	0.24	6.79	2.89	0.09	15.9	21.43	0.63	1.23	0.961
50.89	0.3	6.64	3.41	0.1	16.49	20.63	0.69	1.26	0.981
50.99	0.14	6.43	2.63	0.1	15.93	21.49	0.72	1.39	0.989
51.04	0.11	5.87	3.02	0.09	17.48	21	0.16	1.32	0.972
50.64	0.13	6.55	3.41	0.1	17.43	20.24	0.24	1.25	0.963
50.81	0.25	5.56	2.87	0.08	15.46	23.08	0.49	1.19	0.994
51.28	0.21	5.84	2.65	0.09	16.19	20.73	0.96	1.88	1
51.45	0.14	6.44	3.48	0.09	18.34	18.99	0.53	1.28	0.977
51.31	0.06	4.45	2.73	0.09	17.11	22.65	0.06	1.41	0.995
51.9	0.08	3.74	2.51	0.09	16.65	23.51	0.09	1.31	0.982
51.66	0.15	5.71	2.73	0.09	16.61	22.11	0.23	1.59	0.961
53.38	0.09	2.53	2.25	0.07	17.41	23.48	0.39	0.89	0.99
51.94	0.13	6.05	3	0.09	17.34	20.65	0.3	1.31	0.938
50.57	0.17	6.22	2.66	0.08	16.22	21.78	0.43	1.46	0.99
51.19	0.25	7.05	2.85	0.1	15.65	21.3	0.8	1.23	0.963
50.72	0.26	7	2.95	0.09	14.99	21.97	0.79	0.99	0.96
50.76	0.25	6.56	3.18	0.1	15.73	21.23	0.78	1.07	0.974
52.62	0.33	6.11	2.73	0.09	16.09	20.63	0.88	1.48	0.927
51.65	0.2	5.75	2.71	0.11	16.13	21.04	0.84	1.87	0.99
50.94	0.18	6.73	2.89	0.09	15.8	21.71	0.49	1.19	0.95
50.82	0.17	6.28	3.21	0.1	17.21	20.23	0.47	1.2	0.976
51.16	0.21	6.04	2.87	0.11	16.3	21.79	0.53	1.02	0.977
51.06	0.1	5.5	3.15	0.12	17.68	20.66	0.16	1.4	0.972
51.05	0.12	5.63	2.93	0.09	17.32	21.26	0.21	1.45	0.983
51.03	0.11	5.54	2.94	0.11	16.96	21.7	0.2	1.43	0.98
51.49	0.13	5.92	2.9	0.09	16.83	21.26	0.29	1.41	0.95
50.7	0.11	5.42	2.65	0.09	16.41	22.36	0.28	1.44	1
51.82	0.09	5.42	2.99	0.09	18.45	19.47	0.22	1.35	0.949
52.47	0.13	4.29	2.74	0.08	17.33	21.55	0.27	1.21	0.945
51.19	0.16	5.26	2.79	0.06	16.11	22.46	0.2	1.11	0.944
51.85	0.66	3.8	2.93	0.06	16.35	22.54	0.58	0.93	0.987
52.71	0.29	2.89	2.58	0.06	17.09	22.82	0.3	1.12	0.976
52.5	0.06	3.37	2.67	0.08	17.95	21.75	0.23	1.24	0.981
52.26	0.09	3.7	2.42	0.06	16.86	22.78	0.13	1.13	0.951
51.37	0.16	5.26	2.83	0.08	16.39	22.17	0.31	1.28	0.964
51.84	0.14	4.74	3.43	0.07	17.28	21.73	0.11	0.94	0.942
52.14	0.51	3.3	2.91	0.06	16.95	22.06	0.34	1.15	0.963
51.97	0.17	3.41	2.79	0.06	17.47	21.96	0.11	1.05	0.959
52.015	0.315	3.435	2.24	0.06	16.795	22.28	0.555	1.65	1
53.36	0.2	1.43	6.72	0.23	15.7	21.91	0.46	0.59	0.98
50.96	0.39	5.13	3.13	0.08	16.63	22.63	0.17	1.18	0.98
51.225	0.36	5.33	3.08	0.09	16.815	21.83	0.465	1.45	1
51.24	0.1	4.59	2.73	0.05	16.76	22.42	0.39	1.38	1
51.52	0.09	5.17	3.29	0.08	17.84	20.49	0.29	1.38	0.974
50.99	0.09	5.47	3.32	0.07	17.51	20.82	0.25	1.46	0.984
51.87	0.08	4.16	3.04	0.09	17.76	21.25	0.33	1.14	0.986
52.36	0.1	4.21	3.05	0.07	17.86	21.55	0.05	1.22	0.948
50.8885	0.2325	5.154	2.732	0.08	15.9595	22.6515	0.321	1.1775	0.975
50.8967	0.156667	5.32667	2.93	0.103333	16.3333	21.9967	0.336667	1.35	0.978
51.1567	0.226667	5.2	2.79667	0.08	16.5267	21.8833	0.32	1.29667	0.97
51.3267	0.146667	5.51667	2.95333	0.0966667	16.5767	21.1867	0.36	1.41667	0.949
51.34	0.19	5.59	2.95	0.07	16.5	21.64	0.35	1.51	0.962
50.7446	0.1826	5.2408	2.9956	0.1108	16.1054	21.5436	0.3896	1.396	0.961
51.29	0.13	5.07	2.32	0.07	16.27	22.24	0.48	1.14	0.984
50.3	0.78	4.8	3.5	0.11	18.3	19.5	0.27	1.07	0.994
53.8	0.78	7.87	6.72	0.23	20.28	24.19		1.88	1
49.43	0	1.43	1.94	0	14.8	18		0.11	0.915
