# Supplementary material for: Concerning traditional models and machine learning approaches in geochemical data processing
Source: Research Square preprint supplement (doi:10.21203/rs.3.rs-6401121/v1), 2025-05-20
Supplement: Supplementary file 2 [file 8df6c0288552df85c81a76b8.xlsx]

## Sheet: Abyssal
																Abyssal
LOCATION	Olivine						Spinel							Ortho-Px							Clino-Px
Silvana	Mg#	NiO	MnO	SiO2	FeO	MgO	Mg#	Cr#	TiO2	Al2O3	Cr2O3	FeO	MgO	Al2O3	Mg#	SiO2	Cr2O3	FeO	MgO	CaO	Al2O3	Mg#	TiO2	SiO2	Cr2O3	FeO	MgO	CaO		References
	0.905	0.5098	0.1494	40.2516	9.6972	50.3473	0.67	0.29	0.0439	41.8568	25.1033	16.5664	16.1326	2.7006	0.908	56.5474	0.4966	6.2642	34.8875	0.5981	4.5612	0.914	0.1028	51.4536	1.1557	2.7913	16.6355	23.3498		Modjarrad et al., 2025
	0.906	0.4882	0.0997	40.4908	9.2265	50.3472	0.69	0.25	0.0191	44.2853	22.4548	15.8934	16.5524	3.0232	0.901	54.0013	0.4434	6.6359	33.8864	0.7339	4.3156	0.921	0.0768	51.1639	1.155	2.5627	16.6735	23.5185
	0.907	0.4345	0.1354	41.4165	9.4425	50.8157	0.67	0.25	0.0287	44.0421	21.3343	17.6084	16.1863	3.636	0.9	53.9008	0.7598	6.6833	33.596	0.7105	4.7375	0.913	0.0692	51.9356	1.1132	2.9421	17.2319	22.466
	0.908	0.4034	0.1207	40.4169	10.0297	51.4424	0.66	0.25	0.0505	43.7703	21.2512	17.945	15.867	3.704	0.903	56.1705	0.8065	6.1749	32.1959	2.2678	3.9783	0.913	0.0811	53.1216	0.9591	3.1403	18.4495	21.9785
	0.91	0.4884	0.1115	41.0465	9.4666	51.5963	0.66	0.26	0	43.9295	22.8283	16.4517	15.6993	3.4647	0.903	55.4095	0.743	6.433	33.5552	0.8745	3.6944	0.92	0.1297	51.8812	0.8372	2.7566	17.7082	23.3638
	0.909	0.4419	0.1176	41.289	9.3288	50.9889								3.7093	0.902	54.8419	0.7098	6.4836	33.3225	0.7943	2.64	0.931	0.0645	53.0711	0.2812	2.4144	18.1959	23.9704
	0.904	0.528	0.1249	40.6631	9.596	50.4412								3.529	0.899	56.0215	0.6256	6.7366	33.7051	0.9314	3.5448	0.925	0.1121	51.4525	0.6852	2.3739	16.4551	24.5567
														3.2758	0.9	54.8705	0.8209	6.6857	33.8154	0.4565	3.7752	0.924	0.0875	51.9883	0.9704	2.4448	16.721	24.0991
														4.432	0.899	54.0489	0.918	6.6291	32.5948	0.7905	4.8783	0.91	0.0876	50.3174	1.2574	2.9401	16.68	22.9331
														3.9753	0.904	53.7607	0.507	6.4358	33.9605	0.6129	3.12	0.932	0.063	52.8737	0.1453	2.306	17.7452	23.808
														3.0633	0.9	54.3792	0.6974	6.8213	33.3693	0.3693
Garmab
	0.905	0.38	0.13	40.99	9.56	51.5	0.72	0.34	0.03	37.78	29.48	14.32	17.04	3.84	0.91	55.34	1.02	5.9	32.35	1.96	4.68	0.91	0.07	52.09	1.22	4.28	17.45	23.41		Viesinia et al., 2021
	0.906	0.37	0.15	40.75	9.41	51.73	0.73	0.35	0.06	37.85	30.23	13.82	17.29	3.55	0.92	55.04	0.9	5.89	32.58	2.19	4.58	0.93	0.11	50.55	1.38	2.42	17.26	22.84
	0.907	0.38	0.12	40.54	9.2	50.04	0.73	0.35	0.13	37.5	30.63	12.64	17.14	3.84	0.92	55.72	0.83	5.82	32.39	2.16	4.94	0.92	0.14	51.42	1.33	2.5	17.46	22.18
	0.908	0.4	0.13	41.25	9.45	51.96	0.68	0.37	0.09	36.53	32.48	13.74	16.8	3.84	0.91	55.24	0.78	6.07	33.95	1.14	4.45	0.91	0.07	51.34	1.38	3.01	17.32	21.93
	0.91	0.42	0.15	40.68	9.47	51.21	0.68	0.37	0.09	36.61	32.13	13.83	16.69	3.18	0.91	54.2	0.87	5.63	33.04	1.99	4.34	0.91	0.09	51.25	1.26	2.86	17.44	22.18
	0.909	0.39	0.13	40.57	8.82	50.84	0.67	0.4	0.1	34.07	33.84	16.87	15.69	3.09	0.91	55.03	0.86	5.91	33.01	2.72	4.33	0.92	0.1	51.74	1.37	2.84	17.7	21.68
	0.904	0.41	0.11	40.05	8.35	52.99	0.66	0.4	0.01	33.31	33	17.4	15.01	3.29	0.91	54.82	0.88	5.53	32.49	2.99	4.77	0.92	0.08	51.66	1.39	3.04	18.32	21
	0.905	0.34	0.13	40.31	7.7	52.87	0.65	0.4	0.01	33.8	33.32	17.04	14.96	3.13	0.91	55.44	0.86	6.06	33.96	1.22	4.47	0.91	0.11	52.16	1.25	3.2	18.26	21.38
	0.905	0.39	0.1	41.14	8.79	52.72	0.68	0.4	0.02	33.98	33.29	17.25	15.97	3.03	0.91	54.6	0.81	6.1	33.07	1.84	4.44	0.91	0.07	51.97	1.24	3.2	18.36	21.38
	0.907	0.39	0.16	41.19	8.42	52.25	0.68	0.4	0.05	33.97	34.31	17.26	15.92	3.47	0.91	54.81	0.86	5.68	32.76	1.82
	0.908	0.41	0.12	40.88	8.97	52.4	0.67	0.4	0.12	33.75	34.01	17.39	15.75	3.48	0.91	56.12	0.81	5.71	34.14	1.74
							0.68	0.4	0.03	33.72	32.87	17.02	15.35	3.56	0.92	55.65	0.89	5.39	33.15	2.16
														3.46	0.91	55.26	0.79	5.69	33.28	2.42
														3.91	0.91	54.77	0.89	5.66	33.88	2.05
Ortaka
	0.9	0.4	0.09	40.62	10.03	50.62	0.76	0.16	0.06	52.8	15.04	11.12	19.24	5.85	0.9	53.79	0.73	6.65	33.64	0.79	6.21	0.92	0.24	50.82	1.08	2.48	16.1	22.77		Uysal et a., 2021
	0.897	0.38	0.09	40.26	10.31	50.53	0.72	0.24	0.04	45.88	21.6	12.33	17.7	4.13	0.906	54.68	0.67	6.18	33.59	1.99	3.8	0.929	0.14	52.07	0.82	2.34	17.28	23.89
	0.896	0.42	0.09	40.36	10.44	50.55	0.71	0.22	0.04	47.72	19.91	12.85	17.46	4.21	0.91	54.68	0.56	6.02	34.16	1.8	4.86	0.925	0.11	50.87	1.18	2.43	16.82	23.49
	0.897	0.43	0.13	41.16	10.13	49.45	0.67	0.17	0.03	51.2	16.06	14.34	16.56	5.08	0.899	54.99	0.77	6.56	32.62	0.88	4.75	0.922	0.17	52.39	0.84	2.44	16.29	23.35
	0.899	0.41	0.15	40.59	9.88	49.08	0.67	0.17	0.03	52.45	15.8	14.83	16.71	4.91	0.902	54.84	0.72	6.38	32.8	0.76	3.42	0.933	0.08	52.79	0.88	2.19	17	23.6
	0.898	0.4	0.15	40.79	9.98	49.3	0.71	0.14	0	54.48	13.17	13.23	17.79	5.3	0.899	54.06	0.84	6.48	32.35	0.8	3.02	0.927	0.14	53.34	0.42	2.4	17.04	23.68
	0.896	0.38	0.09	40.36	10.44	50.55	0.7	0.19	0	49.23	17.28	13.01	17.25	4.04	0.902	55.38	0.7	6.49	33.52	0.45	2.76	0.93	0.13	53.35	0.56	2.32	17.27	24.2
	0.924	0.42	0.1	40.69	7.55	51.93	0.57	0.6	0.05	21.57	48.05	16.51	12.41	2.87	0.918	56.39	0.57	5.66	35.64	0.54	3.08	0.962	0.04	53.28	0.93	1.27	17.92	24.26
	0.919	0.43	0.14	40.82	8.13	51.55	0.57	0.57	0.03	23	46.44	16.47	12.45	3.47	0.921	56.37	0.45	5.41	35.45	0.65	3.49	0.941	0.13	53.03	1.05	1.87	16.63	23.62
	0.911	0.41	0.12	41.21	8.78	50.32	0.66	0.31	0	40.81	27.02	14.09	15.47	3.38	0.913	56.26	0.66	5.85	34.31	0.71	1.58	0.942	0.04	54.18	0.64	1.96	17.78	24.24
	0.907	0.4	0.13	41.33	9.14	50.3	0.63	0.38	0	35.62	32.55	15.27	14.36	3.09	0.91	55.5	0.61	6.05	34.12	1	6.21	0.94	0.04	53.23	1.26	1.89	16.72	23.39
	0.906	0.38	0.12	40.59	9.26	50.21	0.64	0.36	0	37.39	31.64	14.91	15	1.9	0.913	55.61	0.93	5.67	33.41	1.42	3.8	0.945	0.03	54.48	0.57	1.86	17.97	24.4
	0.914	0.42	0.13	41.56	8.55	50.93	0.59	0.51	0	27.34	42.23	16.12	13.21	5.08	0.911	55.94	0.66	5.94	33.89	0.96	4.86	0.942	0.06	54.86	0.45	2	18.26	23.93
	0.909	0.43	0.12	40.9	9.02	50.28	0.48	0.76	0.08	11.69	55.52	18.84	9.78	4.91	0.915	57.5	0.38	5.74	34.83	0.9	4.75	0.951	0	54.24	0.56	1.6	17.5	24.21
	0.914	0.41	0.12	40.99	8.54	50.56	0.62	0.56	0.08	22.95	44.73	14.58	13.49	5.3	0.923	56.24	0.51	5.24	35.33	0.69	3.42	0.946	0	54.24	0.52	1.84	18.09	24.49
	0.907	0	0.11	40.68	9.07	49.83	0.56	0.57	0.07	22.97	46.09	17.2	12.14	4.04	0.912	57.01	0.55	5.88	34.15	1.03
Harmancik
Lherz.	0.904	0.41	0.14	39.89	9.41	49.82	0.783	0.212	0.07	48.41	19.44	9.56	19.34	4.1	0.91	54.83	0.67	6.08	33.78	0.86	3.45	0.93	0.07	50.2	0.8	2.71	19.25	21.14		Uysal et al., 2014
	0.907	0.39	0.13	40.25	9.24	50.49	0.733	0.225	0	46.94	20.32	11.6	17.87	4.44	0.91	52.98	0.65	6.03	32.44	1.02	4.84	0.92	0.14	50.27	1.04	2.58	16.73	22.48
	0.903	0.37	0.15	39.96	9.54	49.93	0.8	0.183	0.08	51.47	17.24	8.96	20.11	3.65	0.91	55.71	0.59	6.22	33.32	0.92	4.26	0.93	0.12	50.81	0.98	2.31	16.92	22.77
	0.903	0.39	0.14	40.2	9.67	50.38	0.761	0.212	0.05	48.38	19.35	10.53	18.82	3.83	0.91	55.14	0.58	5.83	33.48	0.52	5.55	0.92	0.11	51.49	1.07	2.86	18.02	20.43
	0.905	0.38	0.13	40.65	9.42	50.22	0.749	0.216	0.04	48.01	19.68	11.02	18.4	4.26	0.91	54.83	0.76	5.93	33.04	1.1	3.74	0.93	0.12	52.59	0.86	2.28	16.79	23.07
	0.905	0.39	0.2	40.39	9.23	49.51	0.772	0.193	0.04	49.57	17.69	10.04	19.05								3.92	0.93	0.18	52.78	0.8	2.29	16.99	22.75
	0.903	0.4	0.12	40.29	9.43	49.23	0.758	0.212	0.03	48.65	19.46	10.71	18.84								4	0.93	0.12	52.05	0.7	2.35	17.07	22.38
	0.902	0.42	0.13	40.65	9.41	48.71	0.721	0.285	0.15	42.5	25.27	11.91	17.29								2.9	0.93	0.15	52.95	1.11	2.53	18.18	21.82
Refahiye
Cpx-rich	0.896	0.3707	0.14	39.1014	9.8818	47.7819	0.672	0.334	0.237	39.8241	29.8561	14.0667	16.1818	2.9089	0.905	55.3424	0.5824	6.3226	33.8921	0.659	2.7029	0.933	0.269	52.437	0.658	2.2156	17.5674	23.7464		Uysal et al., 2015
	0.895	0.4144	0.13	39.0338	9.9238	48.2454	0.669	0.33	0.2032	39.5078	29.0938	13.9179	15.8274	2.9008	0.904	55.4038	0.6192	6.4136	33.8843	0.7333	2.5024	0.934	0.2088	52.5357	0.5528	2.2806	18.1905	22.7145
	0.896	0.3615	0.15	39.2709	9.9358	48.0968	0.672	0.329	0.1586	39.441	28.8364	13.7649	15.8488	2.8946	0.905	55.1664	0.5706	6.3387	34.0212	0.7302	2.4123	0.939	0.2548	53.0532	0.5764	2.058	17.8618	23.9144
	0.898	0.3761	0.15	40.3038	9.9754	49.6591	0.62	0.34	0.0948	37.9765	29.1797	15.639	14.3631	1.9509	0.9	55.3384	0.4152	6.7583	34.3016	0.5705	3.4816	0.936	0.5155	51.9868	0.7194	2.1478	17.8229	22.4815
	0.905	0.3558	0.14	40.1592	9.7677	49.5949	0.605	0.387	0.1421	34.8683	32.8201	16.0624	13.8436	2.0351	0.903	55.7023	0.4132	6.5655	34.2396	0.4948	2.6924	0.931	0.4101	51.9278	0.8025	2.239	17.0443	24.1171

## Sheet: Fore-arc
														Fore-arc
LOCATION	Olivine						Spinel							Ortho-Px							Clino-Px
Avajiq	Mg#	NiO	MnO	SiO2	FeO	MgO	Mg#	Cr#	TiO2	Al2O3	Cr2O3	FeO	MgO	Al2O3	Mg#	SiO2	Cr2O3	FeO	MgO	CaO	Al2O3	Mg#	TiO2	SiO2	Cr2O3	FeO	MgO	CaO		References
	0.9	0.494	0.1351	39.85	9.4989	50.1036	0.49	0.5	0.0054	27.9185	39.8192	21.0534	10.4397	2.0368	0.927	56.437	0.6105	5.9768	33.7568	1.4228	2.3841	0.934	0.0028	52.9605	0.9869	2.185	17.2897	23.8349		Modjarrad et al., 2025
	0.9	0.5174	0.1587	40.312	9.0357	49.7491	0.54	0.49	0	27.3662	39.631	19.143	11.817	2.0461	0.933	56.7664	0.7803	5.9441	33.7061	1.9463	1.7609	0.94	0	53.7572	0.8139	2.0314	17.7457	24.1353
	0.9	0.4433	0.2161	40.709	9.4356	49.6101	0.52	0.49	0	27.8902	38.8246	19.8049	11.2267	2.0066	0.938	56.0849	0.7125	5.8456	33.4754	2.0617	2.1785	0.936	0.044	52.6265	0.9869	2.1145	17.2886	23.8036
	0.9	0.4928	0.1292	40.993	9.7262	49.8888	0.61	0.57	0.0539	28.5238	38.572	19.1219	11.9802	1.903	0.937	55.8328	0.7076	6.0599	33.3259	1.9739	2.0314	0.937	0.0299	53.099	0.8992	2.1555	17.8912	23.5505
	0.9	0.495	0.1089	39.897	9.3327	49.2802	0.57	0.47	0	28.7517	38.1814	18.9965	12.6972	1.9373	0.934	55.9224	0.6168	5.7192	32.7825	2.7832	2.564	0.925	0	53.1866	1.1252	2.7082	18.628	22.3039
	0.9	0.4718	0.1311	39.933	9.0031	49.4561	0.56	0.48	0	28.1447	38.3081	19.632	12.2158	1.7963	0.927	56.3806	0.6253	6.134	33.8841	1.1739	2.5969	0.927	0.049	53.2161	1.0873	2.4452	17.4905	24.0067
	0.9	0.5606	0.1404	41.249	9.3995	49.8699	0.62	0.45	0.0167	30.4223	37.351	16.5469	13.9681	1.7881	0.949	55.0452	0.7148	5.6057	32.4624	3.1187	2.2576	0.936	0	52.9999	1.0447	2.1165	17.3317	23.6899
	0.9	0.4217	0.0842	40.319	9.4452	49.7362	0.54	0.46	0.0552	29.3871	37.6505	19.6557	12.0327	1.5605	0.954	55.247	0.7065	6.1478	34.2388	0.9603	2.5225	0.919	0.0537	53.7378	1.1332	3.0365	19.2975	20.5408
	0.9	0.3895	0.0986	41.335	9.3012	50.0632	0.58	0.44	0	31.3247	37.1189	18.2651	13.1293	2.0968	0.944	55.4199	0.693	6.1033	34.0994	0.7186	2.544	0.923	0	53.1524	1.1319	2.626	17.6973	22.4934
	0.9	0.4075	0.1656	41.597	9.3497	50.3666	0.57	0.45	0.0354	30.5621	37.496	18.7994	12.8942	2.0162	0.918	57.1366	0.717	5.8398	33.1622	2.4339	2.6475	0.926	0	52.1529	1.1823	2.4297	17.1528	23.3272
	0.9	0.4574	0.1209	41.12	9.2769	50.1974	0.57	0.45	0	30.8093	37.8057	18.3195	12.9283	1.9373	0.928	55.9112	0.6592	5.6692	32.0557	3.4788	2.6905	0.938	0	53.0795	1.1353	2.0111	17.1685	23.9163
	0.9	0.3553	0.1097	40.823	9.4319	50.0997	0.57	0.5	0.0109	26.8962	40.982	18.2947	12.5517	1.8654	0.956	55.2041	0.748	6.0495	34.1061	1.2265	2.063	0.933	0	53.3254	0.9426	2.232	17.5118	23.6611
	0.9	0.3632	0.0971	41.686	8.9657	50.2865	0.58	0.49	0.0373	28.2549	39.8725	17.9007	12.9101	2.0075	0.92	56.6014	0.6961	6.0137	33.2169	1.9922	3.1958	0.935	0.0181	51.4819	1.2577	2.1117	17.1227	23.3246
	0.9	0.3621	0.1137	40.638	9.0844	50.2921	0.58	0.48	0.0081	29.0593	39.7451	18.0279	13.0611	2.506	0.908	56.28	0.7159	5.9178	32.6326	3.1806	2.5947	0.926	0.0451	53.3777	0.9592	2.6532	18.6797	22.1875
	0.9	0.4308	0.1602	41.468	9.2222	50.5155	0.59	0.44	0.0324	31.7477	37.0871	18.2524	13.5845	2.4425	0.908	56.7558	0.7417	6.1036	33.7382	1.2922	2.3173	0.939	0.0243	53.5387	0.8864	2.0258	17.395	24.3894
	0.9	0.4458	0.1218	41.068	8.9956	49.9233	0.59	0.46	0.0395	29.8112	37.9416	18.6563	13.2404	2.652	0.906	56.1085	0.6353	6.1733	33.3242	1.3759	2.8842	0.934	0	52.7419	1.0205	2.2019	17.4098	23.5519
	0.9	0.455	0.1358	41.152	9.3495	50.2789	0.59	0.48	0.0104	28.544	39.7161	18.1931	13.0431	2.6137	0.904	56.4632	0.767	6.246	33.1053	1.6727	3.1835	0.925	0	53.1734	0.9975	2.7029	18.6297	21.6742
	0.9	0.3931	0.12	41.2866	9.2934	50.2357	0.61	0.49	0.0302	27.5708	40.6015	17.5737	13.7172	2.4705	0.91	56.5837	0.7372	5.9315	33.4659	1.4092	3.0587	0.931	0.029	53.1767	1.096	2.3374	17.7207	22.6867
	0.9	0.4333	0.1238	40.0484	9.0875	49.8482	0.6	0.5	0.0255	27.3672	40.621	17.5002	13.2977	2.3648	0.908	55.1756	0.7004	6.0114	33.4654	1.6464	3.0031	0.928	0.0192	52.3217	1.0614	2.5402	18.3501	22.329
	0.91	0.4664	0.164	40.6664	9.3517	50.1434	0.63	0.48	0.0447	29.1673	40.2033	17.2938	14.2684	2.5304	0.908	56.3429	0.7323	6.059	33.6077	1.8911	3.3302	0.932	0.0116	52.3926	1.2314	2.2298	17.068	23.6419
	0.92	0.4007	0.1518	41.3644	9.4092	50.8199	0.6	0.48	0.0192	28.4396	39.5731	17.0394	13.3155	2.356	0.913	56.9772	0.7516	5.7527	33.8503	1.6598	3.0868	0.93	0.0296	52.9869	1.1814	2.3669	17.6219	23.1484
	0.91	0.3686	0.1095	40.3556	9.1829	50.0839	0.62	0.47	0.0187	29.0622	38.5458	16.4474	13.7761	2.6881	0.907	56.5795	0.7283	6.0926	33.3931	1.6816	2.9486	0.917	0.0372	53.4618	1.0703	2.9488	18.3541	21.8102
	0.91	0.367	0.0958	40.4769	9.4907	50.7364	0.59	0.48	0.0222	28.4872	38.7201	17.8313	13.0837	2.3142	0.91	55.2502	0.7273	5.9212	33.6303	1.0378	3.0306	0.912	0.0247	53.2036	1.1217	3.4765	20.227	18.9978
	0.91	0.3875	0.1325	40.2554	9.6989	50.5076	0.59	0.52	0.0465	25.3047	41.7009	17.0998	12.5889	2.1527	0.91	56.2379	0.6233	5.9043	33.675	1.6962	3.129	0.908	0.04	54.5298	1.1106	4.1426	22.9055	15.9214
	0.91	0.3592	0.158	39.8825	9.5362	50.3405	0.59	0.45	0.0051	30.4895	36.6418	18.1927	13.0866	2.1039	0.909	55.66	0.5429	6.0486	33.8098	1.2222	2.8625	0.929	0.0267	53.0644	1.0101	2.395	17.611	23.609
	0.92	0.4138	0.1766	39.6648	9.3443	50.4399	0.58	0.49	0.0227	27.7948	40.6442	17.6737	13.0324	2.5812	0.908	56.2916	0.7267	5.9801	33.0706	2.3484	2.9688	0.931	0.0181	52.7263	1.2061	2.2796	17.3638	24.1127
	0.91	0.4103	0.1304	40.0214	9.3163	50.2847	0.56	0.5	0.0661	27.2789	40.456	18.8862	12.3075	2.5556	0.909	56.645	0.7429	5.8204	32.7742	2.2421	3.0555	0.912	0.0723	51.4421	1.2293	3.1414	18.9327	22.1589
	0.91	0.4725	0.1161	40.3798	9.1252	50.6132	0.56	0.47	0.0031	28.8874	38.484	19.1604	12.4353	2.5648	0.908	55.2034	0.8847	5.9871	33.2061	1.9253	3.3279	0.927	0.0728	53.2514	1.2476	2.5185	17.9224	23.0515
	0.92	0.4265	0.1285	40.0655	9.1798	50.526	0.55	0.5	0.0133	26.8006	40.5768	19.386	12.0489	2.4739	0.911	55.2997	0.768	5.9405	33.9663	1.5513	3.2622	0.925	0.0521	52.9262	1.1817	2.5618	17.8381	22.7074
	0.9	0.3964	0.144	41.4577	9.1512	49.9743	0.6	0.55	0.062	24.4367	44.999	17.6011	13.3955	2.2367	0.913	55.9595	0.8373	5.7605	33.9373	1.4072	2.7143	0.926	0.0118	53.8285	1.0553	2.8694	20.1645	20.4219
	0.91	0.3982	0.069	41.0123	9.3888	50.7876	0.61	0.55	0.0468	24.6506	44.3497	17.6299	13.4231	2.3706	0.911	55.5949	0.7591	5.9674	34.2794	1.5682	2.756	0.923	0.0276	54.1479	1.0275	2.9235	19.6964	21.6228
	0.9	0.4663	0.1466	41.9129	8.9826	50.0978	0.61	0.54	0.0466	25.0255	44.5855	17.001	13.5039	2.6549	0.909	55.5896	0.8945	5.9789	33.5075	1.4693	2.6973	0.932	0.0838	54.8292	1.0328	2.5335	19.3841	22.1238
	0.9	0.363	0.1017	41.4279	9.5035	50.2287	0.59	0.56	0.054	24.1086	45.1706	17.4893	12.9458	2.4351	0.908	54.7915	0.7407	6.1681	34.0197	1.8247	2.9363	0.915	0.0176	53.4566	1.1165	3.1772	19.2872	20.7205
	0.9	0.4118	0.091	42.1539	9.1215	50.3817	0.59	0.56	0.0331	23.6862	45.3254	17.5224	12.7663	2.4011	0.91	55.9129	0.8738	5.8674	33.1075	2.5633	2.6801	0.93	0	52.6682	1.2008	2.4788	18.5377	22.1378
	0.9	0.4807	0.1281	41.9718	8.987	50.1331	0.59	0.55	0.0161	24.2479	44.8047	17.7339	12.8724	1.9599	0.912	54.8207	0.7508	5.4362	31.7881	4.3338	2.9605	0.921	0.007	52.6012	1.1255	2.6591	17.5001	23.2935
	0.9	0.4575	0.145	41.3916	8.9473	50.0312	0.59	0.54	0.057	25.0035	43.921	17.1798	12.9894	2.3693	0.908	56.448	0.7972	6.1028	33.7069	1.7195	2.9217	0.919	0.043	52.8374	1.1746	3.0701	19.4907	19.8313
	0.9	0.3566	0.1081	41.7153	9.3913	50.4296	0.61	0.58	0.047	22.9137	46.457	17.0749	13.2516	2.208	0.906	57.807	0.865	6.3195	34.1733	1.3206	2.7857	0.927	0.0218	53.6439	1.0934	2.4208	17.2774	23.4092
	0.9	0.4308	0.1466	42.0929	9.5514	50.8441	0.6	0.59	0.037	22.1658	46.9342	17.2109	12.7825	2.2051	0.91	57.9647	0.7536	6.0298	34.0971	1.5655	2.4899	0.93	0.0485	54.1781	1.171	2.5256	18.9019	21.6682
	0.9	0.4602	0.1326	42.0756	8.9771	50.6957	0.55	0.52	0	25.8074	42.1637	19.2712	11.9448	2.1626	0.906	57.5232	0.7951	6.3587	34.4973	0.6367	2.1239	0.932	0.0361	54.4731	0.7757	2.4249	18.757	22.2548
	0.9	0.427	0.1355	42.1521	9.5593	50.8524	0.61	0.56	0.0502	23.6522	44.4369	18.1001	13.3229	1.8546	0.907	56.7083	0.515	6.227	34.0892	1.0768	2.5896	0.929	0.0285	53.8888	1.1794	2.4951	18.3749	21.7185
	0.9	0.4128	0.0909	41.1898	9.1043	51.0918								1.8548	0.915	57.2205	0.6564	5.4338	32.7803	3.2346	2.4259	0.916	0.0181	52.5535	1.1111	3.4751	21.2726	18.949
														1.8347	0.907	57.2264	0.7428	6.1915	33.7999	1.7028	2.367	0.939	0.0296	54.6651	0.9886	2.0282	17.6078	24.0289
														2.0947	0.909	56.6556	0.5503	6.1008	34.0641	1.4906	2.2881	0.933	0.0171	54.4071	0.986	2.3397	18.204	22.6025
														1.9229	0.912	57.3666	0.5638	5.8053	33.6479	1.5751	1.83	0.94	0.0199	53.6313	0.9725	2.0447	17.9133	24.3362
														1.8937	0.91	57.5749	0.8473	6.0085	34.106	1.2846	1.6605	0.943	0.0504	55.1181	0.7287	1.9238	17.6945	24.3607
														2.0973	0.913	56.3658	0.846	5.7277	33.8919	1.4307	2.5954	0.923	0.0397	54.5276	1.3821	2.7526	18.5631	21.4713
														2.0735	0.914	56.9895	0.6951	5.5594	33.3078	2.2287	2.3339	0.926	0.0149	53.4	1.1599	2.5578	17.9017	21.6699
														1.9954	0.911	57.8896	0.6721	5.9372	34.0163	1.3037	2.4584	0.924	0.0076	54.2519	1.0733	3.0293	20.5803	19.2974
																					2.4559	0.909	0.0173	54.8581	0.8618	3.9287	21.9558	17.7575
																					2.6678	0.918	0.0437	54.418	1.1556	3.0761	19.3936	20.3137
																					2.5777	0.923	0.0133	53.0036	1.1304	2.886	19.3082	19.8388
																					2.5541	0.922	0.0072	53.1089	1.1148	2.8087	18.733	21.1111
																					2.3104	0.934	0.0108	52.8366	1.2027	2.5033	19.7726	21.5239
Van ET
	0.928	0.36	0.16	41.27	6.86	51.3	0.55	0.717	0.15	14.82	56.17	17.1	11.53	1.38	0.94	57.05	0.19	4.85	34.52	1.71										Uner, 2021
	0.928	0.33	0.16	41.34	6.83	51.21	0.528	0.731	0.17	14.02	56.81	17.83	10.76	1.28	0.93	56.87	0.21	4.59	34.27	1.55
	0.923	0.29	0.16	41.27	7.59	50.88	0.555	0.724	0.17	14.3	55.97	17.14	11.32	1.65	0.93	56.83	0.18	4.62	33.37	2.68
	0.927	0.33	0.16	41.07	6.97	51.37	0.532	0.724	0.16	14.42	56.49	17.47	11.15	1.57	0.93	56.97	0.24	4.48	34.78	0.93
	0.925	0.31	0.17	40.85	7.21	51.37	0.53	0.728	0.17	14.07	56.39	17.95	10.84	1.37	0.93	57.06	0.19	4.62	34.73	1.15
	0.927	0.34	0.2	41.5	6.87	50.94	0.506	0.738	0.15	13.67	57.41	18.42	10.37	1.61	0.93	56.76	0.25	4.49	34.06	1.72
	0.927	0.32	0.18	40.86	6.96	51.49	0.546	0.732	0.17	13.95	56.85	17.26	11.18	1.04	0.93	57.2	0.2	5.06	34.59	1.21
	0.919	0.35	0.21	40.49	7.74	50.95	0.548	0.737	0.18	14.03	56.76	16.99	11.16	1.39	0.93	56.83	0.19	5.04	34.3	1.36
	0.927	0.29	0.16	40.88	6.98	51.58	0.554	0.723	0.18	14.37	56.17	16.94	11.24	1.04	0.92	57.04	0.22	5.25	34.42	1.18
	0.926	0.36	0.17	41.16	7.06	51.08	0.539	0.725	0.18	14.3	56.27	17.1	10.84	1.02	0.94	57.31	0.3	4.36	35.11	1.03
	0.93	0.33	0.17	41.59	6.6	51.09	0.54	0.722	0.16	14.49	56.38	17.08	11.05	1.34	0.93	57.07	0.19	4.57	34.23	1.74
	0.926	0.33	0.21	40.79	7.08	51.54	0.541	0.727	0.18	14.16	56.51	17.07	11.11	1.34	0.93	56.95	0.24	4.47	34.62	1.21
	0.925	0.3	0.16	40.64	7.26	51.62	0.541	0.728	0.17	14.17	56.58	17.45	11.17
	0.925	0.39	0.2	41.01	7.15	51.28	0.574	0.734	0.17	13.87	57.14	16.87	11.5
	0.923	0.44	0.18	40.04	7.43	51.79	0.552	0.729	0.17	14.1	56.62	17.23	11.29
	0.921	0.41	0.16	40.28	7.64	51.05	0.541	0.728	0.17	14.16	56.52	17.28	11.14
	0.923	0.32	0.17	41.14	7.32	50.77	0.539	0.73	0.17	14.07	56.91	17.13	11.08
Sahneh
	0.902	0.39	0.13	41.34	9.4	49.68	0.68	0.26	0.04	46.28	23.72	14.26	16.92	2.15	0.9	56.81	0.7	5.95	33.42	1.37	4.1	0.93	0.11	51.68	1.01	2.44	17.18	22.79		Allahyari et al., 2010
	0.903	0.38	0.16	41.19	9.57	49.76	0.73	0.27	0.03	45.08	24.93	12.85	18.07	1.75	0.91	56.72	0.69	5.84	33.41	1.72	3.58	0.93	0.09	52.16	0.79	2.53	18.46	22.36
	0.91	0.4	0.18	41.4	8.91	49.74	0.73	0.65	0.03	46.93	22.87	12.79	17.95	0.98	0.91	56.98	0.39	5.95	35.25	0.77	2.43	0.93	0.04	53.34	0.93	2.24	17.22	23.52
	0.912	0.4	0.16	41.26	9.2	49.82	0.61	0.52	0.02	26.7	43.59	16.44	13.8	2.39	0.91	56.01	0.83	5.79	33.94	1.32	2.38	0.94	0.03	52.64	1.13	2.16	17.69	23.61
	0.913	0.47	0.15	41.32	8.59	50.34	0.62	0.61	0.02	20.32	47.66	16.87	13.37	1.8	0.91	56.16	0.56	6.05	34.97	0.75	1.58	0.95	0	53.01	0.61	1.8	17.9	24.1
	0.914	0.44	0.12	41.36	8.77	50.29	0.47	0.71	0.05	14.94	53.96	21.81	9.7	1.91	0.91	55.99	0.76	5.71	34.54	0.59	2.83	0.83	0.69	52.36	0.16	5.93	15.91	21.67
	0.92	0.38	0.11	41.07	8.8	50.01	0.67	0.45	0.05	31.69	39.08	15.21	15.49	2.47	0.92	56.27	0.63	5.78	34.42	1.1	3.05	0.83	0.73	51.93	0.12	5.71	15.67	22.2
	0.93	0.4	0.16	40.84	8.93	49.79	0.66	0.52	0.02	27.01	43.06	15.2	14.84	2.53	0.91	56.07	0.82	5.59	33.63	2.38	2.14	0.87	0.37	52.93	0.34	4.26	16.49	22.62
	0.86	0.41	0.12	41.17	7.84	51.59	0.57	0.59	0.01	22.57	48.11	17.18	12.39	1.33	0.92	57.08	0.25	5.83	35.59	0.51	2.89	0.86	0.35	53.09	0.23	4.71	15.86	22.51
	0.82	0.4	0.13	41.02	8.9	50.43	0.59	0.59	0.02	21.85	47.39	18.57	12.42	1.94	0.92	56.22	0.81	5.41	34.29	1.89	1.64	0.79	0.4	52.62	0.08	7.07	15.09	22.34
	0.93	0.43	0.09	41.49	6.88	51.93	0.62	0.57	0.03	22.7	45.62	18.45	12.69	2.07	0.92	55.76	0.65	5.59	34.46	0.95	2.39	0.78	0.29	52.91	0.13	7.72	15	20.82
	0.86	0.11	0.29	39.19	22.61	39.99	0.56	0.53	0.02	26.35	44.07	16.96	13.87
	0.82	0.18	0.26	40.11	16.84	44.1	0.56	0.57	0.04	23.05	44.96	19.63	12.04
Kizilyuksek
	0.95	0.48	0	41.54	4.39	50.34	0.54	0.81	0.17	9.67	60.19	16.75	10.88								0.8	0.95	0.04	53.21	1.57	1.43	17.06	24.52		Avci et al., 2016
	0.971	0.63	0	42.82	3.15	52.89	0.62	0.75	0.23	12.77	57.8	14.15	13.21								1.26	0.97	0.09	55.19	1.42	1.13	17.32	23.97
	0.972	0.62	0	41.14	3.23	50.86	0.62	0.78	0.19	11.37	59.92	14.1	13.07								0.78	0.97	0	55.77	1.84	1.09	16.81	25.09
	0.973	0.68	0	41.85	3.06	51.23	0.6	0.78	0.2	11.34	59.37	14.91	12.6								2.83	0.97	0.06	51.77	1.56	0.99	16.61	24.37
	0.974	0.56	0	42.38	3.52	54.71	0.64	0.76	0.21	12.51	58.98	13.57	13.69								1.3	0.96	0.07	53.36	1.81	1.15	16.99	24.76
	0.97	0.66	0	42.94	3.14	54.68	0.67	0.8	0.19	12.26	56.94	12.27	13.99								0.85	0.96	0.06	54.82	1.66	1.14	17.36	24.93
	0.96	0.56	0	41.26	3.33	50.53	0.66	0.8	0.19	10.23	59.3	12.41	13.81								1.23	0.96	0	53.79	1.55	1.26	17.25	24.22
Kizildagh
	0.907	0.38	0.13	41.6	9.02	49.1	0.594	0.492	0.03	27.8	40.1	18.5	13.3	2.2	0.909	57	0.63	5.95	33.1	1.04										Chen et al., 2019
	0.909	0.382	0.13	41.5	9.08	49.1	0.582	0.479	0.01	28.9	39.7	18.7	13.1	2.25	0.908	56.9	0.68	6.03	33.2	1.19
	0.915	0.39	0.1	41.2	8.32	49.8	0.662	0.449	0.08	31	37.7	15.2	15	2.58	0.92	56.6	0.84	5.26	32.8	1.69
Harmancik
Harz.	0.916	0.42	0.14	41.18	8.34	51.42	0.594	0.547	0.16	24.81	44.67	16.14	13.27	2.21	0.912	54.49	0.66	5.82	33.75	0.88	2.96	0.94	0.04	51.82	1.07	1.97	17.05	23.98		Uysal et al., 2014
	0.91	0.39	0.11	40.06	8.93	50.88	0.677	0.369	0.05	37.32	32.49	13.72	16.16	2.95	0.91	54.36	0.67	6.02	33.99	0.39	2.53	0.94	0.09	51.71	0.92	2.21	17.74	23.49
	0.912	0.45	0.13	40.47	8.88	50.43	0.54	0.461	0.1	28.82	36.74	18.07	11.91	2.52	0.909	54.59	0.61	6.11	34.41	0.69	3.23	0.93	0.11	53.41	1.55	2.37	16.33	22.7
	0.913	0.46	0.09	40.98	8.58	50.42	0.64	0.408	0.03	32.31	33.19	14.49	14.54	2.57	0.907	56.33	0.84	6	32.67	1.31
	0.905	0.44	0.09	40.7	9.16	49.18	0.609	0.489	0.14	27.88	39.78	15.67	13.69	3.49	0.906	54.75	0.51	6.28	33.91	0.83
							0.49	0.531	0.11	25.12	42.18	19.58	10.57
Lycian
	0.902	0.42	0.19	41.6	9.59	49.1	0.578	0.481	0.03	28.5	39.4	18.9	12.8	1.88	0.91	56.6	0.3	6.24	34.4	0.39	3	0.94	0.03	53.5	1.1	1.97	16.9	24		Pan et al., 2022
	0.903	0.33	0.09	41	8.35	50.6	0.599	0.471	0.08	29.2	39.1	17.8	13.4	0.2	0.91	57.8	0.06	6.21	35.3	0.1	2.85	0.94	0.05	53.1	1.09	2.04	16.5	24.1
	0.908	0.31	0.12	41	9.02	49.8	0.624	0.467	0.04	29.6	38.6	17.5	13.9	2.54	0.91	55.9	0.76	5.59	33	0.87	2.52	0.93	0	53.3	1.03	2.27	17.7	24
	0.916	0.35	0.14	42.2	8.08	48.7	0.592	0.457	0.04	30.5	38.2	17.9	13.3	0.91	0.92	57.7	0.73	5.79	35.2	0.19	2.34	0.94	0.05	54.1	1.09	1.84	17.2	23.9
	0.913	0.41	0.1	41.8	8.54	49.6	0.591	0.441	0.07	31.2	36.7	18.1	13.1								2.67	0.94	0.03	53.1	1.05	1.99	17.6	23.5
	0.919	0.43	0.09	40.9	8.02	50.8	0.583	0.422	0.01	31.5	34.3	19.9	13
	0.909	0.33	0.15	41.3	8.95	49.7	0.601	0.441		31.1	36.5	17.3	13.4
	0.918	0.42	0.1	41.1	8.11	50.7	0.607	0.439	0.04	31.1	36.3	17.4	13.5
							0.602	0.469		29.2	38.5	17.6	13.3
							0.583	0.461	0.03	29.6	37.7	17.7	12.8
Kop
	0.938	0.43	0.1	41.3	6.24	53	0.518	0.785	0.21	10.5	57.2	21.2	10.6	2.38	0.89	56.3	0.41	7	32.7	0.5	0.49	0.96	0.03	53.4	0.42	1.5	18.2	25.1		Uysal et al., 2016
	0.922	0.35	0.13	41	7.88	51.7	0.456	0.78	0.21	10.5	55.4	24	9.19	1	0.94	56.4	0.39	4.38	35.7	0.5	0.51	0.963	0.03	54	0.24	1.26	18.3	25.4
	0.922	0.34	0.13	40.9	7.82	51.9	0.556	0.761	0.2	10.9	51.7	21.6	12.6	1.93	0.92	57.1	0.48	5.46	33.8	0.8	0.56	0.96	0.04	54.1	0.43	1.27	18.1	25.2
	0.916	0.32	0.14	40.9	8.42	51.2	0.482	0.766	0.21	11.3	55.2	23.2	9.86	2.35	0.91	56.1	0.5	6.29	33.2	0.8	0.58	0.96	0.03	54.2	0.48	1.27	18	24.9
	0.917	0.33	0.14	40.7	8.25	51.3	0.463	0.779	0.21	10.5	55.2	24.5	9.41								2.59	0.93	0.04	53.1	0.79	2.19	16.8	24.2
	0.936	0.41	0.09	41.3	6.38	52.4	0.454	0.786	0.2	10.1	55.4	24.6	9.15								0.97	0.96	0.14	54.6	0.63	1.3	18.1	24.8
	0.924	0.37	0.11	41.2	7.62	51.7	0.576	0.783	0.22	10.5	56.4	19.1	11.7								2.12	0.94	0.16	53.7	0.7	2.08	17.5	24.2
	0.924	0.36	0.12	41.1	7.63	51.9	0.477	0.77	0.21	10.6	55	22.8	9.54								2.2	0.94	0.09	53.6	0.6	2.1	17	24.8
							0.478	0.78	0.21	10.5	55.4	23.2	9.66
							0.552	0.7	0.11	15.1	52.5	18.8	11.3
Refahyie
Cpx-poor	0.931	0.4487	0.1427	40.6053	8.582	50.5669	0.608	0.528	0.07	24.2809	41.9766	18.1466	11.3849	1.5963	0.916	56.219	0.5388	5.7135	35.0532	0.6089	1.1772	0.95	0.0843	53.1361	0.5146	1.6808	17.9375	24.6462		Uysal et al., 2015
	0.908	0.4702	0.1288	39.8632	8.9966	50.1407	0.527	0.514	0.0279	20.5239	46.3931	18.2119	10.7874	1.5265	0.916	56.4045	0.4775	5.7139	35.014	0.5299	1.4772	0.942	0.0697	54.3742	0.6829	1.8315	16.9649	24.2566
	0.909	0.3688	0.1489	41.4479	8.6293	48.6518	0.513	0.53	0.0506	22.7829	44.396	17.9344	11.3478	1.581	0.909	57.3386	0.5476	6.0128	33.7402	0.5251	1.441	0.946	0.0572	54.4943	0.6529	1.7525	17.2753	24.0545
	0.896	0.5352	0.1456	40.0366	10.1289	49.1012	0.53	0.46	0.0654	19.8781	45.439	20.0332	9.5573	1.376	0.905	56.1031	0.436	6.3918	34.29	1.2078	1.4289	0.938	0.0339	53.5527	0.539	2.0976	17.9345	24.3387
	0.898	0.4909	0.1431	40.1687	9.934	49.2566	0.459	0.461	0.0429	19.1465	45.4119	19.8417	9.5147	1.4099	0.906	56.0836	0.5236	6.3599	34.5721	0.7301	1.3188	0.941	0.03	53.4723	0.5583	2.0292	18.1737	24.1694
	0.931	0.4946	0.1568	40.0701	10.0891	49.3775	0.46	0.46	0.0681	19.438	44.8512	19.8702	9.4902	1.3583	0.906	56.301	0.4688	6.3892	34.4747	0.7599	1.38331	0.94	0.0362333	53.3505	0.544781	2.03912	18.0703	24.1839
	0.908	0.4333	0.1081	40.5823	8.1917	50.6413	0.459	0.461	0.0572	13.7266	52.3139	19.3313	9.2894	0.5659	0.919	57.5189	0.1321	5.6547	35.8245	0.181
	0.909	0.3065	0.1341	40.604	8.4711	50.5821	0.461	0.447	0.1486	13.548	52.0054	19.8924	9.0124	0.8398	0.92	57.0359	0.2905	5.4637	35.3948	0.6913
	0.896	0.3674	0.1253	40.956	8.1895	50.4703	0.446	0.459	0.1249	12.736	54.3223	19.3729	9.2326	0.653	0.921	57.3126	0.2376	5.5079	35.825	0.1892
	0.898	0.4413	–	40.9695	6.3909	51.9357	0.459	0.495	0.1709	13.5907	55.1885	18.2017	10.0272
	0.9	0.3536	0.0883	41.1087	6.5123	51.934	0.495	0.484	0.0215	13.0355	56.0447	18.5819	9.774
	0.9	0.3457	0.1174	40.7747	7.8938	51.0635	0.494	0.477	0.0429	13.0591	55.9775	18.8495	9.6511
Pozanti
	0.914	0.4	0.14	41.81	8.14	48.83	0.527	0.649	0.13	17.64	48.61	17.57	10.96	2.09	0.912	57.32	0.66	5.61	32.81	0.89	0.57	0.958	0.05	55.69	0.17	1.35	17.2	26.14		Saka et al., 2014
	0.911	0.39	0.12	41.8	8.39	48.06	0.597	0.512	0.01	26.23	40.94	15.55	12.91	1.1	0.912	58.42	0.44	5.69	33.27	0.86	2.18	0.938	0.03	54.09	0.96	1.95	16.48	23.46
	0.907	0.41	0.14	41.85	8.86	48.51	0.5	0.674	0.02	16.75	51.73	18.36	10.28	1.61	0.913	57.56	0.54	5.63	33.13	0.7	1.03	0.944	0.04	55.26	0.6	1.81	17.19	23.96
	0.907	0.4	0.13	41.49	8.7	47.71	0.534	0.498	0.05	26.79	39.55	17.89	11.52	1.7	0.911	57.4	0.5	5.58	31.9	0.75	1.57	0.94	0.06	54.45	0.6	1.95	17.21	23.72
	0.908	0.44	0.13	41.57	8.49	46.92	0.54	0.553	0.03	23.7	43.77	17.47	11.53	2.02	0.914	57.68	0.67	5.52	32.72	0.96	1.6	0.939	0.03	54.48	0.64	1.93	16.53	24.85
	0.91	0.43	0.11	41.89	8.55	48.25	0.592	0.521	0.02	26.2	42.52	15.82	12.9	2.07	0.914	57.03	0.61	5.66	33.87	1.27	1.9	0.94	0.05	54.13	0.83	1.93	16.82	23.87
	0.91	0.47	0.14	40.7	8.82	49.92	0.579	0.507	0.02	27.67	41.87	16.71	12.89	2.21	0.919	56.74	0.73	5.23	33.38	1.36	2.34	0.936	0.04	53.45	1	2.06	16.88	24.36
	0.915	0.44	0.13	41.19	8.3	49.88	0.582	0.512	0.03	26.87	41.91	16.38	12.84	1.58	0.907	57.46	0.6	5.94	32.4	1.28	2.01	0.94	0.03	53.3	0.89	1.96	17.23	23.65
	0.905	0.43	0.12	41.7	8.99	47.87	0.538	0.593	0.03	21.42	46.58	17.37	11.37	1.61	0.911	57.94	0.51	5.74	33.03	0.86	1.66	0.936	0.05	54.29	0.86	2.05	16.86	24.02
	0.907	0.4	0.14	41.9	8.84	48.26	0.564	0.584	0.02	0.74	45.97	16.52	11.97
	0.907	0.41	0.12	41.75	8.84	48.18
	0.903	0.45	0.14	42	9.24	48.18
