# Supplementary material for: Concerning traditional models and machine learning approaches in geochemical data processing
Source: Research Square preprint supplement (doi:10.21203/rs.3.rs-6401121/v1), 2025-05-20
Supplement: Supplementary file 3 [file a5c29fc1efaf469cc59f5c9f.xlsx]

## Sheet: Spl
Sample	TiO2	Al2O3	Cr2O3	FeO	MgO	Mg #	Cr #		References
	0.0054	27.9185	39.8192	21.0534	10.4397	0.49	0.5		Modjarrad et al., 2025
	0	27.3662	39.631	19.143	11.817	0.54	0.49
	0	27.8902	38.8246	19.8049	11.2267	0.52	0.49
	0.0539	28.5238	38.572	19.1219	11.9802	0.61	0.57
	0	28.7517	38.1814	18.9965	12.6972	0.57	0.47
	0	28.1447	38.3081	19.632	12.2158	0.56	0.48
	0.0167	30.4223	37.351	16.5469	13.9681	0.62	0.45
	0.0552	29.3871	37.6505	19.6557	12.0327	0.54	0.46
	0	31.3247	37.1189	18.2651	13.1293	0.58	0.44
	0.0354	30.5621	37.496	18.7994	12.8942	0.57	0.45
	0	30.8093	37.8057	18.3195	12.9283	0.57	0.45
	0.0109	26.8962	40.982	18.2947	12.5517	0.57	0.5
	0.0373	28.2549	39.8725	17.9007	12.9101	0.58	0.49
	0.0081	29.0593	39.7451	18.0279	13.0611	0.58	0.48
	0.0324	31.7477	37.0871	18.2524	13.5845	0.59	0.44
	0.0395	29.8112	37.9416	18.6563	13.2404	0.59	0.46
	0.0104	28.544	39.7161	18.1931	13.0431	0.59	0.48
	0.0302	27.5708	40.6015	17.5737	13.7172	0.61	0.49
	0.0255	27.3672	40.621	17.5002	13.2977	0.6	0.5
	0.0447	29.1673	40.2033	17.2938	14.2684	0.63	0.48
	0.0192	28.4396	39.5731	17.0394	13.3155	0.6	0.48
	0.0187	29.0622	38.5458	16.4474	13.7761	0.62	0.47
	0.0222	28.4872	38.7201	17.8313	13.0837	0.59	0.48
	0.0465	25.3047	41.7009	17.0998	12.5889	0.59	0.52
	0.0051	30.4895	36.6418	18.1927	13.0866	0.59	0.45
	0.0227	27.7948	40.6442	17.6737	13.0324	0.58	0.49
	0.0661	27.2789	40.456	18.8862	12.3075	0.56	0.5
	0.0031	28.8874	38.484	19.1604	12.4353	0.56	0.47
	0.0133	26.8006	40.5768	19.386	12.0489	0.55	0.5
	0.062	24.4367	44.999	17.6011	13.3955	0.6	0.55
	0.0468	24.6506	44.3497	17.6299	13.4231	0.61	0.55
	0.0466	25.0255	44.5855	17.001	13.5039	0.61	0.54
	0.054	24.1086	45.1706	17.4893	12.9458	0.59	0.56
	0.0331	23.6862	45.3254	17.5224	12.7663	0.59	0.56
	0.0161	24.2479	44.8047	17.7339	12.8724	0.59	0.55
	0.057	25.0035	43.921	17.1798	12.9894	0.59	0.54
	0.047	22.9137	46.457	17.0749	13.2516	0.61	0.58
	0.037	22.1658	46.9342	17.2109	12.7825	0.6	0.59
	0	25.8074	42.1637	19.2712	11.9448	0.55	0.52
	0.0502	23.6522	44.4369	18.1001	13.3229	0.61	0.56
	0.0439	41.8568	25.1033	16.5664	16.1326	0.67	0.29
	0.0191	44.2853	22.4548	15.8934	16.5524	0.69	0.25
	0.0287	44.0421	21.3343	17.6084	16.1863	0.67	0.25
	0.0505	43.7703	21.2512	17.945	15.867	0.66	0.25
	0	43.9295	22.8283	16.4517	15.6993	0.66	0.26
	0.2198	26.4792	40.3063	20.2603	12.3298	0.56	0.5
	0.2142	27.8653	40.7461	18.5746	14.0435	0.62	0.5
	0.2876	26.2055	41.4481	19.0447	13.0838	0.6	0.51
	0.227	26.6016	40.6945	18.647	13.4035	0.59	0.51
	0.1902	25.9228	41.0718	18.7152	13.4728	0.6	0.52
	0.2187	24.8944	41.7356	18.9157	13.0981	0.59	0.53
	0.188	27.747	38.828	18.919	12.436	0.57	0.48		Modjarrad et al., 2024
	0.181	27.625	39.185	18.898	12.515	0.57	0.49
	0.188	28.068	39.036	18.645	12.582	0.57	0.48
	0.176	27.985	39.395	18.779	12.689	0.57	0.48
	0.16	27.943	39.227	18.435	12.558	0.57	0.48
	0.182	28.08	39.377	18.655	12.687	0.57	0.48
	0.164	27.891	39.368	18.562	12.829	0.58	0.47
	0.157	28.009	39.407	18.239	12.855	0.58	0.49
	0.211	27.972	39.181	18.409	12.613	0.57	0.48
	0.241	28.19	39.02	18.699	12.801	0.57	0.48
	0.224	28.428	38.897	18.746	12.757	0.57	0.48
	0.202	28.991	38.334	18.835	12.887	0.58	0.47
	0.236735	28.6837	39.7082	18.2755	13.4541	0.59	0.48
	0.187755	28.9143	39.6541	18.4663	13.4592	0.59	0.48
	0.194898	28.6959	39.9347	18.4827	13.3796	0.59	0.48
	0.233673	28.651	40.1449	18.4143	13.3367	0.59	0.49
	0.194898	28.4663	39.9643	18.401	13.148	0.59	0.49
	0.212245	28.1643	40.149	18.2755	13.249	0.59	0.49
	0.255102	28.249	40.2673	18.2765	13.2439	0.59	0.49
	0.259184	28.3133	40.0582	18.4612	13.2163	0.59	0.49
	0.1793	19.8084	46.9589	14.6939	13.1544	0.614746	0.614025		Golowin et al., 2017
	0.1848	20.1502	47.1519	15.273	12.9419	0.601656	0.610938
	0.17025	21.1551	46.3945	14.6392	13.478	0.621362	0.595414
	0.18015	19.992	47.048	15.4483	12.7729	0.595755	0.612285
	0.18025	20.2012	46.4886	16.4894	12.0823	0.566359	0.606962
	0.1771	19.0942	47.8697	15.8444	12.4542	0.583516	0.627193
	0.1573	18.1658	49.5132	14.8405	12.9806	0.60923	0.646524
	0.22615	19.4411	46.4341	18.5375	10.7302	0.507811	0.615796
	0.16485	18.3494	49.4934	14.9216	13.0675	0.609521	0.644131
	0.1614	19.8288	48.3252	14.7493	13.2655	0.615845	0.620557
	0.1953	19.4105	46.8549	16.4974	11.9182	0.562876	0.6183
	0.1651	16.6711	51.0231	15.3765	12.4494	0.590688	0.672541
	0.17945	20.2879	47.2757	15.0971	13.0965	0.607262	0.609942
	0.1877	20.0932	47.2858	14.809	13.2673	0.614923	0.612284
	0.2224	21.2731	45.6339	15.3523	13.0702	0.602777	0.590082
	0.1722	21.1486	46.8803	14.7677	13.4941	0.619585	0.597995
	0.1753	19.4012	48.6854	15.4244	12.9174	0.598834	0.627414
	0.1756	22.0896	45.5795	14.6405	13.499	0.621707	0.580651
	0.1719	19.9638	47.449	14.9724	13.1146	0.609568	0.614634
	0.17985	20.8698	47.0534	15.5475	12.8681	0.596003	0.602064
	0.1854	20.2625	47.2116	14.9878	13.1688	0.610305	0.609917
	0.17985	19.914	47.9831	15.0518	13.1786	0.609468	0.617871
	0.1814	20.2226	47.6765	15.0207	13.2279	0.610849	0.612713
	0.19295	20.5328	46.147	14.4034	13.4924	0.625426	0.601305
	0.18745	14.3347	54.4537	15.0796	12.5556	0.597439	0.718243
	0.176	20.4256	46.9143	14.4207	13.4731	0.624809	0.606501
	0.1866	20.4516	47.3748	14.7487	13.3659	0.617638	0.608527
	0.1914	20.8698	46.5538	14.6922	13.4596	0.62019	0.599504
	0.1996	22.4082	45.535	14.5717	13.7306	0.626803	0.576922
	0.20145	21.8406	46.4846	14.815	13.6074	0.620802	0.588179
	0.19325	19.6352	48.9179	15.0654	13.1737	0.609165	0.625724
	0.2034	20.7902	47.9189	14.6721	13.5532	0.622143	0.607335
	0.17885	20.7703	47.2611	14.9068	13.3659	0.615117	0.604263
	0.1657	19.5256	48.8932	14.4169	13.5631	0.626429	0.626915
	0.2036	21.6116	46.3066	14.2602	13.8243	0.633424	0.589802
	0.17655	21.6515	46.0642	14.652	13.5976	0.623233	0.588086
	0.1919	20.0832	47.993	14.9851	13.3018	0.612736	0.61592
	0.1946	20.6856	47.5232	14.7512	13.4053	0.618293	0.60656
	0.18075	18.3905	49.6053	14.9047	13.085	0.610109	0.644135
	0.15705	16.2996	51.7122	15.2153	12.6464	0.597017	0.680408
	0.18685	20.596	47.1374	14.9042	13.361	0.61507	0.60565
	0.1687	17.4148	51.0495	14.9761	12.9569	0.606626	0.662973
	0.20365	20.3521	47.3353	14.7828	13.3561	0.616919	0.60949
	0.14725	22.3131	45.8648	14.1894	13.9174	0.636135	0.579719
	0.1924	19.9665	47.7262	14.6459	13.3717	0.619391	0.61598
	0.1724	21.6857	46.0678	14.3779	13.787	0.630885	0.587722
	0.14695	17.0078	50.8548	14.7968	12.8647	0.607795	0.667389
	0.18415	19.788	47.5777	14.6997	13.3814	0.618697	0.617366
	0.1647	21.6346	45.9539	14.4399	13.6808	0.628077	0.587694
	0.1709	19.8033	47.6272	14.5689	13.3621	0.620462	0.617429
	0.1726	20.14	47.0628	14.6129	13.3669	0.619837	0.610609
	0.1649	18.9565	48.6618	14.2684	13.391	0.625865	0.632706
	0.1559	15.0591	53.3299	15.0922	12.5411	0.596961	0.703832
	0.16045	20.2114	47.5727	14.3719	13.5311	0.626608	0.612328
	0.1709	19.9971	47.6915	14.7224	13.3717	0.618162	0.615445
	0.2037	20.3899	46.7559	14.7893	13.3717	0.617091	0.606111
	0.1773	20.3338	47.0183	14.6868	13.3041	0.617536	0.608103
	0.17025	19.5176	48.3004	14.7514	13.3041	0.6165	0.624154
	0.19815	18.7473	49.6172	15.532	12.6667	0.592438	0.639774
	0.17685	18.982	48.8202	14.9254	13.1592	0.611125	0.633149
	0.1642	18.5126	48.9637	14.8203	13.0965	0.611668	0.639621
	0.1945	19.0687	49.0429	15.2976	12.8502	0.599563	0.633148
	0.19235	20.6348	47.2608	14.5188	13.5166	0.623974	0.605826
	0.1905	20.3032	46.8797	14.2481	13.5552	0.629047	0.607759
	0.1955	20.0124	47.3054	14.8736	13.2268	0.613167	0.613338
	0.2051	18.8085	48.5925	14.8869	13.0771	0.61025	0.634194
	0.1692	19.9614	47.2658	14.5287	13.3862	0.621537	0.613745
	0.1988	19.7216	48.0925	14.7971	13.3283	0.616196	0.620696
	0.16525	19.0993	48.2608	14.5705	13.222	0.617952	0.629031
	0.17685	19.7421	47.8846	14.6954	13.3138	0.61757	0.619432
	0.1584	21.5867	47.1473	14.4134	13.7503	0.62969	0.594426
	0.1769	22.0896	45.9158	14.1703	13.9278	0.636618	0.58244
	0.16385	21.8008	46.8061	14.0761	14.0214	0.639706	0.590289
	0.15955	21.5867	47.7556	15.4842	12.9273	0.598087	0.597513
	0.157	21.2681	47.4935	14.2919	13.844	0.633238	0.599763
	0.1755	22	46.722	14.7551	13.3856	0.617883	0.587653
	0.16185	21.8406	47.083	14.0032	14.051	0.641386	0.591274
	0.1571	21.3478	47.1028	14.1908	13.77	0.633645	0.59688
	0.16685	21.5718	47.2561	14.6476	13.5778	0.622963	0.595148
	0.1573	21.6863	48.1117	16.2666	12.3359	0.57478	0.598193
	0.193	19.6949	49.6202	14.5985	13.361	0.619966	0.628347
	0.17585	21.9502	46.262	14.8712	13.3068	0.614633	0.585803
	0.17165	21.5917	47.1325	15.1139	13.2526	0.609821	0.594295
	0.17315	21.7859	47.4292	15.5368	12.9914	0.598461	0.593649
	0.19525	22.3236	46.1532	13.4726	14.3565	0.655099	0.581131
	0.17	21.8307	47.0731	16.2386	12.3359	0.5752	0.591334
	0.17465	18.4055	50.8615	15.767	12.3457	0.58258	0.649662
	0.1721	22.0497	46.8011	14.3176	13.7306	0.630909	0.587515
	0.17475	22.0995	46.5093	14.5457	13.5926	0.624857	0.585451
	0.1778	21.5569	46.994	15.0554	13.3216	0.611976	0.593975
	0.17625	22.5177	46.9891	15.7939	12.7696	0.590353	0.58339
	0.14575	22.1941	47.0039	14.5388	13.7257	0.627248	0.586981
	0.1887	23.2645	46.5291	16.3978	12.3852	0.57379	0.573035
	0.1737	19.665	49.1355	14.9203	13.2476	0.612796	0.626407
	0.17	21.9601	47.9881	17.0294	11.9219	0.555128	0.594553
	0.21575	21.0291	47.2017	16.049	12.4985	0.581259	0.600996
	0.16135	19.0129	50.1395	14.678	13.3758	0.618946	0.638945
	0.20635	19.3663	49.1207	15.0339	13.0998	0.608323	0.629912
	0.16865	18.6793	50.8813	15.9584	12.464	0.581964	0.646382
	0.1936	20.9893	47.8546	17.1406	11.6015	0.54678	0.604738
	0.21505	20.0534	47.6073	16.3584	12.2176	0.571045	0.614362
	0.16395	15.1645	53.8784	15.8501	12.0451	0.575289	0.70451
	0.21165	20.3272	47.9831	16.4358	12.0845	0.567203	0.613011
	0.1879	15.7918	52.5332	15.6748	12.193	0.580977	0.690627
	0.08905	17.9107	51.028	13.9089	13.6566	0.636377	0.656576
	0.10655	24.0833	43.1125	13.619	14.4245	0.653721	0.545719
	0.1099	21.9458	45.355	14.1004	13.8643	0.636705	0.581038
	0.09285	21.3745	46.0133	13.6743	14.0285	0.646468	0.590934
	0.06925	13.7837	55.7804	14.6659	12.7053	0.606941	0.730867
	0.0896	21.7265	45.6223	14.0533	13.7629	0.635782	0.584909
	0.1209	21.3643	46.1619	13.752	14.0574	0.645645	0.591828
	0.0989	20.5021	47.6123	13.3193	14.154	0.654474	0.60913
	0.1047	21.6346	46.0183	13.7646	14.0236	0.644883	0.588033
	0.1037	22.2213	44.9144	13.6279	14.125	0.648809	0.575616
	0.1027	22.3947	45.8302	14.1426	14.014	0.638497	0.578645
	0.10205	21.1398	46.1668	13.8697	13.9174	0.641393	0.594403
	0.09815	21.956	46.251	13.6383	14.2409	0.650496	0.58568
	0.1122	23.3441	46.1829	13.665	14.3713	0.652122	0.570369
	0.11125	23.0703	45.629	15.7697	12.7794	0.59091	0.570304
	0.11275	23.3292	46.0444	13.9868	14.051	0.641656	0.56979
	0.1145	24.3797	45.9158	12.6056	15.2535	0.683229	0.558273
	0.12035	23.7175	46.1038	13.6198	14.4699	0.65442	0.566055
	0.11695	24.3	44.2393	16.4963	12.3704	0.572033	0.549891
	0.12195	23.8818	45.3125	13.4189	14.6128	0.659982	0.560098
	0.0993	23.2894	46.1681	13.9921	14.1249	0.642775	0.570866
	0.1065	21.6067	48.27	12.2856	15.1057	0.686675	0.599865
	0.09885	25.1762	44.0859	13.7965	14.3812	0.650101	0.540247
	0.1183	22.0796	45.451	13.8889	14.046	0.643189	0.580073
	0.09	16.6431	52.736	14.7269	13.1343	0.613852	0.680136
	0.11025	22.4829	45.4608	14.0371	14.0263	0.640426	0.575711
	0.09545	24.4992	43.1809	13.8818	14.3319	0.647916	0.541865
	0.07875	19.3116	49.6449	14.1753	13.6666	0.632146	0.633041
	0.09865	22.9309	46.0247	13.9098	14.1594	0.644688	0.573901
	0.09615	23.9416	44.0019	13.7576	14.3467	0.650198	0.552236
	0.0943	22.7169	45.5696	14.2062	13.9623	0.636606	0.573765
	0.0382	17.5442	52.3848	13.3192	13.982	0.651706	0.667076
	0.22705	25.1115	44.9119	12.4846	15.3816	0.687113	0.545492
	0.09845	23.0803	44.4964	15.0214	13.4497	0.614784	0.564028
	0.10355	21.7162	45.9999	14.7632	13.4645	0.61914	0.587024
	0.0925	21.7361	46.3461	14.3867	13.8095	0.631122	0.588619
	0.1359	23.2047	44.1898	14.2185	13.9031	0.635423	0.561003
	0.1185	23.0454	43.9326	15.2262	13.2526	0.608057	0.561262
	0.1092	22.8065	46.0593	13.9245	14.189	0.644923	0.575415
	0.1213	20.1728	47.3798	14.9088	13.1786	0.611738	0.611816
	0.10085	22.3435	45.5894	14.0393	13.9475	0.63909	0.577919
	0.09785	21.7012	47.3699	14.0583	13.9869	0.63943	0.594286
	0.0805	19.7945	48.2107	14.3082	13.4941	0.627006	0.620406
	0.10645	22.458	45.3026	14.203	13.8538	0.634852	0.57513
	0.15	14.82	56.17	17.1	11.53	0.55	0.717		Uner et al., 2021
	0.17	14.02	56.81	17.83	10.76	0.528	0.731
	0.17	14.3	55.97	17.14	11.32	0.555	0.724
	0.16	14.42	56.49	17.47	11.15	0.532	0.724
	0.17	14.07	56.39	17.95	10.84	0.53	0.728
	0.15	13.67	57.41	18.42	10.37	0.506	0.738
	0.17	13.95	56.85	17.26	11.18	0.546	0.732
	0.18	14.03	56.76	16.99	11.16	0.548	0.737
	0.18	14.37	56.17	16.94	11.24	0.554	0.723
	0.18	14.3	56.27	17.1	10.84	0.539	0.725
	0.16	14.49	56.38	17.08	11.05	0.54	0.722
	0.18	14.16	56.51	17.07	11.11	0.541	0.727
	0.17	14.17	56.58	17.45	11.17	0.541	0.728
	0.17	13.87	57.14	16.87	11.5	0.574	0.734
	0.17	14.1	56.62	17.23	11.29	0.552	0.729
	0.17	14.16	56.52	17.28	11.14	0.541	0.728
	0.17	14.07	56.91	17.13	11.08	0.539	0.73
	0.164	20.342	44.474	19.943	13.06	0.612273	0.686158		Gahlan et al., 2020
	0.021	17.758	53.783	14.54	13.203	0.624782	0.751779
	0.033	15.302	52.489	21.114	11.228	0.537855	0.774277
	0.105	20.419	44.228	18.702	14.319	0.666945	0.684146
	0.038	17.691	52.264	17.088	12.34	0.583091	0.747109
	0.125	20.234	43.94	22.008	11.528	0.550576	0.684701
	0.036	15.75	52.221	20.387	11.257	0.538674	0.768284
	0.08	17.839	50.378	19.06	11.707	0.556724	0.738496
	0.081	16.733	46.235	23.393	11.095	0.53815	0.734262
	0.009	15.441	52.463	11.197	11.14	0.583882	0.772605
	0.024	17.433	51.166	21.419	9.085	0.440616	0.745871
	0.019	18.474	52.607	15.03	12.83	0.607015	0.740099
	0.024	18.246	52.917	14.825	13.13	0.618171	0.743603
	0.039	17.409	50.831	20.333	10.649	0.512867	0.744886
	0.119	15.084	47.201	23.64	11.31	0.552442	0.757823
	0.045	15.3	52.299	20.86	11.209	0.536833	0.773665
	0.094	16.562	45.669	24.45	10.715	0.521013	0.733863
	0.02	16.376	51.96	19.354	11.387	0.549547	0.760361
	0.143	17.225	45.734	23.296	11.199	0.540702	0.726409
	0.03	17.5	50.252	25.384	6.119	0.304246	0.741705
	0.014	16.698	52.324	18.792	11.737	0.558468	0.758077
	0.012	18.508	52.362	15.201	13.354	0.626725	0.738846
	0.175	13.413	48.552	23.762	11.489	0.565673	0.783539
	0.088	10.641	54.078	24.806	8.458	0.429222	0.835582
	0.137	13.617	48.056	24.249	11.613	0.567803	0.779206
	0.098	13.351	48.664	24.126	11.314	0.568036	0.784713
	0.062	12.835	54.563	21.493	9.698	0.480792	0.809564
	0.022	15.205	54.202	19.639	10.351	0.501668	0.78093
	0.027	14.437	55.328	18.866	10.914	0.527787	0.793062
	0.052	14.27	53.586	22.243	8.521	0.42324	0.789702
	0.04	14.927	53.168	21.913	8.605	0.426881	0.780792
	0.076	14.893	52.67	21.242	10.61	0.512735	0.779569
	0.058	14.247	53.28	21.77	9.491	0.467169	0.789018
	0.048	14.539	52.72	21.226	10.807	0.523629	0.783836
	0.028	14.338	53.944	22.827	8.387	0.414025	0.790018
	0.116	14.81	53.03	20.678	10.802	0.520818	0.781692
	0.049	15.382	53.887	19.471	10.429	0.504996	0.777938
	0.079	12.447	53.037	22.524	10.628	0.523681	0.809923
	0.065	14.535	52.654	20.662	11.275	0.544448	0.78367
	0.036	13.56	53.483	24.018	8.388	0.415672	0.797742
	0.12	26.28	43.51	14.41	15.81	0.698	0.526		Xiong et al., 2013
	0.02	25.95	41.34	14.41	16.6	0.742	0.516
	0.04	26.75	40.35	18.71	13.24	0.599	0.502
	0.08	26.98	42.39	13.92	17	0.714	0.513
		26.61	42.79	13.43	16.65	0.736	0.518
	0.1	25.56	43.26	14.74	15.8	0.703	0.539
	0.08	17.29	52.81	14.06	15.29	0.706	0.671
	0.08	17.75	52.19	14.64	15.41	0.706	0.553
	0.07	18.28	52.01	13.89	15.47	0.709	0.656
	0.09	17.07	51.37	17.85	12.72	0.6	0.668
	0.1	16.02	53.45	16.85	13.53	0.632	0.691
	0.08	17.38	52.16	14.87	14.84	0.687	0.668
	0.08	13.91	55.28	17.76	12.26	0.589	0.727
	0.08	17.87	52.44	16.95	12.78	0.598	0.663
	0.16	11.65	57.71	18.33	11.65	0.565	0.768
	0.13	11.95	56.72	18.18	12.03	0.584	0.76
	0.09	13.17	56.29	18.09	12.29	0.588	0.74
	0.1	13.51	56.23	17.7	12.17	0.583	0.736
	0.06	5.92	64.17	19.63	10.36	0.517	0.879
	0.1	5.78	64.46	19.65	10.27	0.512	0.882
	0.03	5.86	64.31	19.63	10.03	0.504	0.88
	0.07	5.61	64.55	21.37	9.16	0.459	0.885
	0.06	5.92	63.96	20.12	9.81	0.492	0.878
	0.09	5.84	64.47	19.9	9.98	0.499	0.881
	0.1	17.33	54.46	15.07	14	0.646	0.678
	0.07	16.85	54.66	15.23	13.55	0.63	0.685
	0.07	16.9	54.64	15.15	13.49	0.629	0.684
			54.25	14.68	14.26	0.662	0.684
		27.55	40.35	18.71	13.24	0.599	0.502
		28.06	42.01	14.92	15.66	0.69	0.505
		28.02	41.17	14.96	15.92	0.699	0.495
		28.26	40.87	14.73	16.04	0.706	0.494
		31.43	40.62	14.57	15.92	0.702	0.49
		35.87	36.83	16.09	15.1	0.662	0.446
		42.65	27.12	17.81	16.35	0.707	0.336
		26.85	24.76	16.08	15.82	0.661	0.28
		26.65	39.71	20.32	12.55	0.569	0.497
		26.82	40.29	20.01	12.75	0.576	0.5
		33.19	39.93	19.98	12.58	0.57	0.496
		20.65	34.09	17.9	14.5	0.63	0.41
		26.82	48.24	17.62	12.1	0.553	0.61
		33.19	47.26	18.91	13.07	0.555	0.602
		20.65	46.79	20.72	11.87	0.506	0.609
		20.88	47.16	19.83	12.05	0.523	0.613
		20.1	47.63	18.46	12.36	0.546	0.613
		19.92	47.38	19.15	12.42	0.539	0.609
		20.17	24.27	14.95	17.48	0.712	0.268
		20.37	25.6	12.94	17.42	0.726	0.284
		44.4	24.85	13	17.78	0.733	0.275
		42.78	23.61	13.51	17.96	0.732	0.259
		43.81	22.71	12.99	18.3	0.741	0.247
		45.12	23.57	13.32	18.03	0.736	0.259
		13.93	56.59	13	13.65	0.65	0.729		Kiseleva and Zhmodik, 2017
		14.91	57.88	13.6	13.78	0.64	0.72
		15.51	56.45	12.96	14	0.65	0.709
		12.58	58.95	13.57	13.07	0.62	0.756
		14.47	57.92	13.3	13.93	0.65	0.727
		14.17	57.26	12.7	13.93	0.65	0.728
		13.87	56.74	13.57	13.33	0.64	0.734
		14.83	56.31	15.09	12.6	0.6	0.717
		14.38	54.52	11.79	13.53	0.64	0.717
		14.4	56.8	14.06	13.22	0.63	0.725
		13.7	58.36	13.59	13.55	0.64	0.741
		13.13	59.55	13.53	13.47	0.64	0.753
		13.91	59.37	12.17	14.64	0.68	0.742
		13	56.99	20.61	8.82	0.43	0.747
		14.3	58.57	11.57	15.04	0.7	0.73
		13.81	59.28	12.38	14.41	0.68	0.742
		16.12	58.17	14.57	13.66	0.63	0.708
		13.98	59.24	13.39	13.93	0.65	0.738
		12.55	60.17	12.79	14.05	0.66	0.762
		12.68	59.52	14.04	12.85	0.62	0.76
		12.41	59.68	14.44	12.82	0.61	0.762
	0.71	18.38	44.3	24	12.58	0.58	0.618		Zaeimnia et al., 2016
	0.65	21.68	41.2	22.39	13	0.6	0.56
	0.33	14.9	52.6	18.35	13.96	0.65	0.7
	0.41	19.37	49.87	14.73	16	0.72	0.633
	0.27	13.53	54.2	15.99	14.69	0.7	0.729
	0.23	32.9	36.81	12.86	17.86	0.757	0.429
	0.14	34.22	34.76	15.89	16.18	0.687	0.4
	0.16	34.64	37.88	11.38	16.11	0.689	0.423
	0.16	31.96	38	15.63	14.36	0.627	0.444
	0.03	18.27	51.45	19	11.78	0.553	0.654
	0.04	18.27	51.81	18	12.55	0.585	0.656
	0.39	23.33	43.59	22.87	13.14	0.581	0.556
	0.43	23.38	43.81	21.8	13.2	0.587	0.557
	0.14	34.71	34	16.11	15.79	0.673	0.397
	0.12	34.9	34.7	16.36	15.75	0.666	0.4
	0.13	35.69	33.85	16	16.18	0.68	0.389
	0.16	13.63	50.16	25.64	8	0.427	0.712		Ismail et al., 2010
	0.16	14.25	52.64	18.35	11.7	0.602	0.712
	0.24	13.66	52.28	21.38	10.45	0.537	0.72
	0.19	14.35	51.98	20.46	11.02	0.561	0.708
	0.09	12.62	51.81	25.37	7.68	0.418	0.734
	0.14	11.71	53.43	24.9	7.44	0.415	0.754
		59.03	7.11	12.15	20.01	0.782	0.075		Rogkala et al., 2019
		50.7	16.15	14.17	18.74	0.747	0.176
		42.31	25.3	17.57	14.86	0.623	0.286
		56.25	8.58	12.48	19.36	0.777	0.093
		56.29	10.87	12.68	20.18	0.783	0.115
		31.78	34.01	22.58	11.5	0.512	0.418
		40.39	27.41	19.35	14.34	0.6	0.313
		52.39	14.51	15.15	18.6	0.732	0.157
		44.74	21.47	16.05	16.22	0.676	0.244
		56.71	9.64	13.48	19.87	0.776	0.102
		54.82	10.72	13.48	19.15	0.763	0.116
		58.79	7.44	11.35	20.55	0.803	0.078
		57.81	10.34	13.46	20.34	0.772	0.107
		41.17	27.44	13.7	16.64	0.702	0.309
		39.65	28.55	14.54	16.42	0.695	0.326
		40.93	27.17	13.95	16.77	0.704	0.308
		39.88	28.24	13.86	15.61	0.677	0.322
		41.47	27.59	14.51	16.53	0.692	0.309
		31.24	37.4	19.05	13.32	0.583	0.445
		33.67	35.9	18.56	13.76	0.591	0.417
		27.56	40.51	19.46	13.75	0.607	0.496
		24.35	42.89	18.51	14.18	0.639	0.542
		25.9	44.04	17.95	13.09	0.586	0.533
		8.56	36.24	43.54	1.71	0.124	0.74
		3.36	29.42	59.64	1.68	0.107	0.855
		2.3	31.26	58.33	1.65	0.109	0.901
		23.37	49.19	15.22	14.09	0.629	0.585
		23.59	47.28	15.45	14.03	0.63	0.574
		24.62	45.28	16.42	13.83	0.62	0.55
		1.68	45.79	38.12	2.15	0.21	0.943
		15.88	41.6	18.73	10.79	0.51	0.696
		14.83	54.99	18.43	11.19	0.53	0.714
		16.3	55.12	19.31	10.53	0.506	0.689
		15.95	54.68	19.94	9.63	0.46	0.697
		15.33	54.3	19.57	10.79	0.516	0.704
		28.04	43.03	15.22	13.53	0.61	0.51		Ngo et al., 2015
		29.13	40.57	16.69	13.57	0.6	0.48
		28.05	41.45	16.53	13.38	0.6	0.5
		27.92	41.04	16.92	13.88	0.62	0.5
		20.66	45.44	23.17	11.75	0.54	0.6
		22.67	45.44	20.99	10.42	0.49	0.57
		21.86	44.06	22.52	11.63	0.54	0.57
		21.34	44.36	22.21	11.95	0.55	0.58
		26.66	38.21	22.62	12.15	0.56	0.49
		12.75	54.7	18.63	12.88	0.62	0.74
		14.63	52.16	19.89	12.81	0.61	0.71
		14.93	51.93	20.09	12.64	0.61	0.7
		14.97	51.84	19.38	13.5	0.64	0.7
		20.76	43.09	25.2	10.49	0.5	0.58
		22.07	43.23	23.04	11.16	0.52	0.57
		18.37	44.09	23.15	12.47	0.6	0.62
		15.33	51.87	19.2	12.28	0.59	0.69
		13.36	45.8	30.12	10.15	0.5	0.7
		18.43	49.04	19.57	11.94	0.59	0.64		Aswad et al., 2011
		17.85	50.02	20.07	11.56	0.57	0.65
		24.62	35.75	25.52	9.64	0.47	0.491
		32.62	35.37	16.48	15.22	0.68	0.59
		3.302	29.52	46.205	4.22	0.176	0.857
		33.33	33.22	16.22	15.32	0.68	0.4
		2.34	28.8	46.6	4.39	0.1	0.86
		3.34	21.67	66.03	2.79	0.09	0.8
		3.35	22.8	63.5	3.1	0.1	0.82
		5.32	38.3	48.79	4.26	0.169	0.83
		10	52.63	28.99	6.25	0.44	0.6
		7.47	39.4	45.54	4.78	0.27	0.77
		1.01	43.37	48.2	2.81	0.17	0.776
		31.08	36.33	18.8	14.295	0.65	0.44
		30.14	36.2	18.72	13.39	0.63	0.445
		30.24	36.03	18.83	13.98	0.52	0.44
		30.6	33.74	23.77	10.72	0.273	0.423
		8.53	43.77	37.73	5.95	0.27	0.775
		5.84	46.68	40.16	4.33	0.2	0.84
		8.99	43.1	37.14	6.37	0.29	0.5
		6.72	45.24	39.46	4.9	0.22	0.5
		14.5	51.6	22.4	10.2	0.498	0.704		Xiong et al., 2018
		13.7	51.8	24.8	9.6	0.465	0.717
		14	52.4	21.9	10.5	0.511	0.714
		13.7	52.1	22.1	10.7	0.521	0.718
		23.6	44.2	20.1	11.3	0.523	0.557
		4.7	64.2	21.2	8.5	0.442	0.902
		4.7	63.8	22.1	8.1	0.419	0.902
		4.5	63.5	22.8	7.3	0.389	0.905
		4.5	63.6	22.3	7.9	0.413	0.905
		4.7	63.7	21.6	7.9	0.416	0.901
		10.9	59.4	13.2	15.4	0.677	0.785
		11	59.4	12.4	15.9	0.702	0.784
		11.2	58.9	12.9	15.9	0.691	0.78
		11.1	58.8	12.5	16.3	0.702	0.78
		11.2	59.3	12.7	15.8	0.69	0.78

## Sheet: Ol
Sample	SiO2	NiO	FeO	MgO	MnO	Mg #		References
	39.85	0.494	9.4989	50.1036	0.1351	0.9		Modjarrad et al., 2025
	40.312	0.5174	9.0357	49.7491	0.1587	0.9
	40.709	0.4433	9.4356	49.6101	0.2161	0.9
	40.993	0.4928	9.7262	49.8888	0.1292	0.9
	39.897	0.495	9.3327	49.2802	0.1089	0.9
	39.933	0.4718	9.0031	49.4561	0.1311	0.9
	41.249	0.5606	9.3995	49.8699	0.1404	0.9
	40.319	0.4217	9.4452	49.7362	0.0842	0.9
	41.335	0.3895	9.3012	50.0632	0.0986	0.9
	41.597	0.4075	9.3497	50.3666	0.1656	0.9
	41.12	0.4574	9.2769	50.1974	0.1209	0.9
	40.823	0.3553	9.4319	50.0997	0.1097	0.9
	41.686	0.3632	8.9657	50.2865	0.0971	0.9
	40.638	0.3621	9.0844	50.2921	0.1137	0.9
	41.468	0.4308	9.2222	50.5155	0.1602	0.9
	41.068	0.4458	8.9956	49.9233	0.1218	0.9
	41.152	0.455	9.3495	50.2789	0.1358	0.9
	41.2866	0.3931	9.2934	50.2357	0.12	0.9
	40.0484	0.4333	9.0875	49.8482	0.1238	0.9
	40.6664	0.4664	9.3517	50.1434	0.164	0.91
	41.3644	0.4007	9.4092	50.8199	0.1518	0.92
	40.3556	0.3686	9.1829	50.0839	0.1095	0.91
	40.4769	0.367	9.4907	50.7364	0.0958	0.91
	40.2554	0.3875	9.6989	50.5076	0.1325	0.91
	39.8825	0.3592	9.5362	50.3405	0.158	0.91
	39.6648	0.4138	9.3443	50.4399	0.1766	0.92
	40.0214	0.4103	9.3163	50.2847	0.1304	0.91
	40.3798	0.4725	9.1252	50.6132	0.1161	0.91
	40.0655	0.4265	9.1798	50.526	0.1285	0.92
	41.4577	0.3964	9.1512	49.9743	0.144	0.9
	41.0123	0.3982	9.3888	50.7876	0.069	0.91
	41.9129	0.4663	8.9826	50.0978	0.1466	0.9
	41.4279	0.363	9.5035	50.2287	0.1017	0.9
	42.1539	0.4118	9.1215	50.3817	0.091	0.9
	41.9718	0.4807	8.987	50.1331	0.1281	0.9
	41.3916	0.4575	8.9473	50.0312	0.145	0.9
	41.7153	0.3566	9.3913	50.4296	0.1081	0.9
	42.0929	0.4308	9.5514	50.8441	0.1466	0.9
	42.0756	0.4602	8.9771	50.6957	0.1326	0.9
	42.1521	0.427	9.5593	50.8524	0.1355	0.9
	41.1898	0.4128	9.1043	51.0918	0.0909	0.9
	40.2516	0.5098	9.6972	50.3473	0.1494	0.91
	40.4908	0.4882	9.2265	50.3472	0.0997	0.91
	41.4165	0.4345	9.4425	50.8157	0.1354	0.91
	40.4169	0.4034	10.0297	51.4424	0.1207	0.91
	41.0465	0.4884	9.4666	51.5963	0.1115	0.91
	41.289	0.4419	9.3288	50.9889	0.1176	0.91
	40.6631	0.528	9.596	50.4412	0.1249	0.91
	40.9016	0.229344	11.8348	47.4844	0.189376	0.877331		Golowin et al., 2017
	40.7591	0.241153	11.7747	47.8009	0.189087	0.878589
	40.6573	0.234703	11.7747	47.5635	0.186966	0.878057
	40.6675	0.237878	12.0252	47.6031	0.192171	0.875875
	40.7795	0.247902	11.5141	47.6921	0.182148	0.880717
	40.8813	0.270628	11.1333	48.1175	0.175883	0.885111
	40.8202	0.238871	11.8047	47.613	0.191689	0.877895
	40.8915	0.232718	11.8147	47.4547	0.191496	0.877447
	40.6878	0.234207	11.8548	47.4646	0.192556	0.877104
	40.6369	0.237481	11.955	47.7119	0.194773	0.876757
	40.8609	0.245619	11.3738	47.6921	0.180606	0.881999
	40.9424	0.249986	11.444	47.8603	0.183979	0.881725
	40.7489	0.231825	11.8849	47.4844	0.18899	0.876876
	40.8813	0.261895	11.3838	47.9196	0.182341	0.882402
	40.7082	0.233909	11.935	47.514	0.190532	0.876489
	40.6471	0.24294	11.5041	47.613	0.182148	0.880634
	40.6573	0.244726	11.7847	47.5536	0.190629	0.877944
	40.6675	0.233413	11.7446	47.5734	0.191882	0.878353
	39.9445	0.235596	11.8949	47.9988	0.188894	0.877944
	40.8609	0.248993	11.5943	47.8207	0.185232	0.88027
	39.578	0.240657	11.6243	47.702	0.187834	0.879734
	40.7184	0.246711	11.5943	47.8702	0.184268	0.880379
	39.7612	0.240459	11.6444	47.7317	0.18475	0.879617
	39.9649	0.271025	11.3337	48.0186	0.181859	0.883072
	39.7612	0.247604	11.5843	47.5536	0.182533	0.87977
	39.7103	0.245024	11.6243	47.6921	0.188027	0.879712
	39.7918	0.243535	11.7847	47.4942	0.189858	0.87781
	40.1278	0.26646	11.5742	48.4143	0.18369	0.881744
	39.6492	0.228351	12.1254	47.3953	0.194869	0.874491
	39.7714	0.24294	11.6845	47.7218	0.188701	0.879231
	40.6878	0.234504	11.8949	47.6228	0.190629	0.877099
	39.802	0.233115	12.0051	47.4052	0.195737	0.875603
	39.6289	0.238077	11.8248	47.5536	0.188798	0.877579
	39.6492	0.239962	11.8548	47.5734	0.190629	0.877351
	39.3845	0.240558	11.7446	47.6031	0.186485	0.878419
	40.0323	0.26921	11.2274	47.8679	0.176716	0.883719
	40.834	0.328751	10.1749	48.4314	0.155117	0.894568
	41.0293	0.290236	10.656	48.0261	0.164387	0.889305
	41.2245	0.291022	10.7262	47.858	0.167541	0.88831
	41.4301	0.297114	10.8465	47.9371	0.168688	0.887364
	40.0118	0.332877	9.98439	48.5797	0.151294	0.89662
	39.9912	0.287583	11.067	47.947	0.171077	0.885357
	40.207	0.291022	10.9467	47.9173	0.169644	0.886399
	39.4979	0.292201	10.8465	48.1052	0.170217	0.887713
	39.837	0.276186	11.1272	47.8185	0.173658	0.884532
	40.4331	0.280116	11.1773	47.947	0.175952	0.884347
	39.9604	0.275695	11.067	47.9865	0.1749	0.885441
	40.0426	0.276775	11.047	47.947	0.172607	0.885541
	40.0837	0.292299	10.7563	48.2535	0.168306	0.888847
	40.4023	0.284144	11.1873	47.9272	0.177672	0.884213
	39.8781	0.272649	10.9969	47.9964	0.171938	0.886105
	41.0395	0.277758	11.1773	47.8086	0.172511	0.884051
	41.2657	0.281098	11.0169	47.9668	0.170026	0.885858
	40.1865	0.309002	10.3854	48.4413	0.159895	0.89264
	41.3068	0.332877	10.0546	48.6489	0.154925	0.896102
	40.3818	0.295443	10.8565	48.1249	0.169548	0.887662
	40.4948	0.318336	10.3252	48.4512	0.161233	0.893215
	40.5462	0.283064	11.037	48.0261	0.172702	0.8858
	40.7929	0.286797	11.0771	47.9272	0.172511	0.885223
	40.4948	0.31588	10.5057	48.3128	0.165725	0.891274
	40.6593	0.311753	10.636	48.2436	0.163718	0.889933
	40.5154	0.279133	11.1773	47.9173	0.177385	0.884283
	40.279	0.275203	11.2575	47.8679	0.173849	0.883444
	40.207	0.28326	10.9367	47.8877	0.171651	0.886429
	40.1043	0.304286	10.8465	48.0854	0.164961	0.887672
	40.2276	0.284144	10.9768	47.8877	0.171938	0.88606
	40.0529	0.300749	10.5257	48.2238	0.164387	0.89091
	41.4301	0.319417	10.225	48.5303	0.158748	0.894296
	41.019	0.274909	11.2174	47.7789	0.178532	0.883619
	39.9706	0.275302	11.1071	47.7987	0.174996	0.884674
	40.2893	0.261841	11.1673	47.9964	0.177194	0.884544
	40.1556	0.286404	11.0069	47.8382	0.173849	0.885679
	40.0118	0.279035	11.057	47.9173	0.171938	0.885386
	40.0631	0.296721	10.6661	48.2732	0.167446	0.889717
	40.277	0.302391	11.2893	48.6294	0.178498	0.884772
	40.4669	0.348996	10.0137	49.327	0.152205	0.897758
	40.6867	0.315841	10.6866	49.043	0.164604	0.891073
	40.5218	0.329438	10.4857	49.1626	0.160551	0.893134
	40.5418	0.295593	11.2491	48.7291	0.174735	0.885343
	40.7067	0.314314	11.0633	49.0081	0.172998	0.887594
	40.9866	0.331458	10.5309	49.3868	0.163253	0.893157
	40.6168	0.304904	11.0382	48.8935	0.170441	0.887587
	40.7217	0.319388	10.7218	49.2124	0.16417	0.891089
	40.8416	0.344563	10.2598	49.5014	0.155582	0.895838
	40.6418	0.300273	11.0231	48.9683	0.170103	0.887876
	40.7267	0.351016	10.1543	49.596	0.153556	0.896975
	39.9939	0.325068	10.2962	48.8609	0.158347	0.894282
	39.5478	0.332346	10.3763	48.1881	0.163154	0.892221
	40.0446	0.35664	10.1459	48.4948	0.157867	0.894959
	39.416	0.317101	10.827	48.8214	0.167577	0.889355
	40.6224	0.291331	11.1675	48.0397	0.172961	0.884633
	39.7506	0.354279	9.95564	49.2666	0.150752	0.898179
	39.7202	0.349067	10.166	49.2963	0.155078	0.896307
	39.6695	0.322117	10.8671	48.7818	0.166327	0.888911
	40.1156	0.328412	10.4364	48.95	0.162289	0.89317
	40.4197	0.329297	10.4464	48.9698	0.158059	0.893117
	39.1322	0.300577	11.0674	49.4546	0.171423	0.888459
	39.6289	0.313757	10.7369	49.1083	0.163924	0.890746
	39.8418	0.355066	10.176	49.2468	0.156521	0.896122
	40.7948	0.334903	10.2461	48.6235	0.158732	0.894283
	40.4096	0.326346	10.2962	48.8214	0.157867	0.894206
	40.2575	0.365197	10.0057	49.1677	0.15104	0.897534
	39.4667	0.346214	10.3963	48.8708	0.154886	0.893383
	39.0511	0.324772	10.5165	48.9599	0.160174	0.892458
	39.3654	0.350148	10.216	49.0885	0.156328	0.895454
	40.9266	0.315625	10.797	47.1095	0.166808	0.886074
	39.7202	0.35182	10.0858	49.2172	0.152675	0.896891
	38.534	0.30579	10.6868	48.6828	0.16575	0.890354
	39.7607	0.318674	10.827	49.138	0.167865	0.889989
	39.7911	0.331657	10.5466	49.2567	0.160174	0.892764
	39.6796	0.313658	11.1275	48.663	0.171711	0.886305
	39.9939	0.33392	10.6167	49.1776	0.168058	0.891973
	39.4769	0.325166	10.5866	49.2963	0.163635	0.892477
	40.4096	0.296839	10.827	48.3365	0.168442	0.888369
	39.7405	0.341591	10.2461	49.3161	0.155559	0.895612
	40.4602	0.328117	10.5866	49.0193	0.161135	0.891935
	39.0004	0.307658	11.0474	48.9995	0.171903	0.88772
	39.487	0.333231	10.5065	48.6729	0.161328	0.891984
	39.1322	0.32969	10.4063	49.5932	0.159982	0.894682
	39.7202	0.302839	11.1475	48.8411	0.175076	0.886492
	39.3552	0.322314	10.5866	48.95	0.162674	0.891799
	39.5884	0.321232	10.5065	48.95	0.15902	0.89253
	39.3248	0.309035	10.837	49.4942	0.168827	0.890604
	39.7506	0.297429	11.1175	48.1782	0.174499	0.885384
	40.7644	0.284053	10.9472	47.0106	0.16825	0.884457
	39.0511	0.303528	11.1776	48.9203	0.171807	0.886384
	39.0409	0.31415	10.6167	49.6228	0.163731	0.892838
	40.6529	0.353591	10.3162	48.4058	0.157578	0.893209
	38.9497	0.302839	11.1976	49.5041	0.177095	0.887395
	39.3349	0.290348	11.2377	48.5542	0.176807	0.885081
	39.6391	0.332739	10.4063	49.2864	0.160366	0.894096
	40.1156	0.288381	11.3078	48.5245	0.175557	0.884384
	40.0446	0.334215	10.2862	49.6822	0.158924	0.895939
	40.2068	0.299003	11.1776	48.5344	0.173346	0.885584
	40.5008	0.34887	10.3863	48.8016	0.159405	0.893339
	40.1764	0.281397	11.1976	48.4651	0.177384	0.885258
	39.3234	0.300797	11.1133	49.5816	0.171065	0.888303
	41.1766	0.287002	11.0431	48.2659	0.173185	0.886246
	40.81	0.33821	10.1613	49.2551	0.154296	0.896272
	40.6369	0.338905	10.2916	49.1265	0.155741	0.894836
	40.8507	0.313499	10.7726	48.3351	0.168559	0.888865
	41.1053	0.324118	11.0331	48.6319	0.173378	0.887097
	40.2602	0.311812	10.8828	48.8396	0.169908	0.888885
	40.1803	0.296909	11.7618	48.1805	0.180271	0.879546
	40.8116	0.270322	10.093	49.6076	0.159598	0.897555
	40.6637	0.290979	9.95305	49.688	0.153339	0.898979
	40.782	0.286235	9.97304	49.7483	0.161495	0.898906
	40.7525	0.229601	10.6925	49.3865	0.170788	0.891695
	40.9892	0.272397	10.2428	49.6579	0.160926	0.896286
	40.9892	0.272397	10.2428	49.6579	0.160926	0.896286
	40.6387	0.347346	9.08683	49.6279	0.141937	0.90685
	40.717	0.310285	9.49669	49.558	0.148179	0.902933
	40.6485	0.261298	10.1764	49.3086	0.158454	0.896234
	40.8345	0.299936	9.43671	49.8075	0.148083	0.903924
	40.5604	0.206003	10.8462	48.8096	0.172475	0.889156
	40.9226	0.322606	9.00686	49.9772	0.142321	0.908181
	40.7072	0.28732	9.84656	49.4882	0.153173	0.899588
	40.8165	0.25854	10.3492	49.0612	0.168058	0.894184
	40.6697	0.263268	10.2792	49.2107	0.164008	0.895109
	40.4153	0.250267	10.1494	48.7324	0.165551	0.895386
	40.4936	0.264351	10.1594	49.2107	0.163912	0.896206
	40.5719	0.26445	10.1294	49.0911	0.163815	0.896254
	39.9435	0.220333	11.1971	48.6538	0.176373	0.885656
	40.6393	0.303963	9.19047	50.02	0.143884	0.906557
	40.6493	0.235611	10.5048	48.953	0.166143	0.892551
	40.7785	0.30555	9.19047	49.9003	0.143694	0.906353
	40.7189	0.314379	9.44131	49.7507	0.146062	0.903782
	40.87	0.343	8.427	49.924	0.13	0.913497
	40.746	0.343	8.442	49.892	0.128	0.913306
	40.824	0.35	8.483	50.031	0.131	0.913142
	40.833	0.355	8.456	49.866	0.131	0.913133
	40.7	0.367	8.436	49.722	0.129	0.913092
	40.664	0.347	8.469	49.844	0.13	0.912976
	40.734	0.348	8.461	49.791	0.13	0.912967
	40.711	0.347	8.467	49.809	0.13	0.912939
	40.713	0.344	8.499	49.906	0.128	0.912794
	40.726	0.347	8.512	49.947	0.129	0.912738
	40.713	0.342	8.482	49.743	0.131	0.912693
	40.544	0.346	8.48	49.727	0.131	0.912686
	40.449	0.352	8.51	49.736	0.131	0.912419
	40.645	0.35	8.526	49.817	0.135	0.912398
	40.632	0.338	8.613	49.696	0.132	0.911387
	40.68	0.324	8.687	49.835	0.135	0.910921
	40.603	0.305	8.736	49.56	0.134	0.910011
	40.623	0.313	8.908	49.593	0.139	0.908457
	40.545	0.309	9.013	49.362	0.139	0.907085
	40.585	0.366	9.042	49.356	0.139	0.906804
	40.694	0.297	9.275	49.323	0.144	0.904574
	40.562	0.253	9.337	49.283	0.146	0.903927
	40.557	0.244	9.398	49.286	0.147	0.903365
	40.492	0.254	9.385	49.132	0.148	0.903212
	40.586	0.299	9.451	49.211	0.14	0.902739
	40.542	0.24	9.512	49.075	0.15	0.901928
	40.202	0.363	9.575	48.848	0.146	0.90093
	40.605	0.237	9.662	49.092	0.15	0.900567
	40.614	0.238	9.655	49.054	0.151	0.900562
	40.502	0.241	9.632	48.86	0.15	0.900421
	40.523	0.307	9.687	49.01	0.15	0.900185
	40.506	0.229	9.699	48.916	0.149	0.899901
	40.545	0.33	9.904	48.789	0.152	0.897763
	40.458	0.304	9.971	48.718	0.154	0.897008
	40.559	0.273	10.037	48.753	0.16	0.896463
	40.593	0.301	10.051	48.754	0.155	0.896336
	40.461	0.272	10.063	48.644	0.159	0.896015
	40.642	0.273	10.128	48.943	0.159	0.895986
	40.356	0.275	10.106	48.674	0.159	0.895674
	40.464	0.274	10.177	48.758	0.16	0.89518
	40.346	0.337	10.165	48.681	0.157	0.895142
	40.41	0.276	10.187	48.707	0.158	0.89499
	40.412	0.27	10.218	48.574	0.161	0.894446
	40.236	0.273	10.225	48.583	0.16	0.894399
	40.406	0.286	10.228	48.494	0.158	0.894198
	40.457	0.281	10.279	48.608	0.159	0.893949
	40.584	0.311	10.321	48.779	0.158	0.893895
	40.68	0.281	10.349	48.65	0.16	0.893386
	40.229	0.355	10.355	48.385	0.158	0.892809
	40.539	0.354	10.667	48.321	0.161	0.889805
	40.338	0.232	10.914	48.019	0.167	0.886913
	40.398	0.229	10.941	48.088	0.165	0.886809
	40.231	0.233	11.066	47.893	0.17	0.885252
	40.478	0.325	11.104	48.009	0.174	0.885149
	40.549	0.327	11.22	48.163	0.171	0.884417
	40.339	0.326	11.203	47.98	0.17	0.884182
	40.31	0.329	11.252	47.848	0.173	0.883451
	40.189	0.329	11.324	47.817	0.171	0.882726
	40.361	0.327	11.344	47.769	0.172	0.882439
	40.207	0.227	11.592	47.648	0.177	0.879909
	40.261	0.226	11.597	47.626	0.178	0.879814
	40.282	0.283	11.848	47.418	0.178	0.877061
	39.772	0.301	13.411	45.903	0.188	0.85918
	39.79	0.313	14.055	45.551	0.197	0.852444
	40.536	0.341	8.46	49.842	0.13	0.913057
	40.521	0.347	8.487	49.802	0.13	0.91274
	40.312	0.354	8.52	49.764	0.131	0.91237
	40.453	0.387	8.587	49.603	0.129	0.91148
	40.266	0.317	8.657	49.529	0.135	0.910702
	40.629	0.33	8.792	49.62	0.136	0.909586
	40.517	0.32	8.791	49.528	0.136	0.909443
	40.387	0.335	8.958	49.526	0.137	0.907878
	40.639	0.293	8.973	49.572	0.136	0.907815
	40.218	0.316	8.914	49.209	0.137	0.907752
	40.498	0.286	8.969	49.42	0.136	0.907595
	40.381	0.33	8.985	49.507	0.136	0.907594
	40.444	0.288	9.041	49.375	0.139	0.906846
	40.611	0.338	9.078	49.48	0.139	0.90668
	40.578	0.312	9.122	49.383	0.14	0.906103
	40.472	0.273	9.093	49.102	0.139	0.905889
	40.606	0.302	9.27	49.388	0.139	0.904734
	40.51	0.336	9.334	49.205	0.144	0.903817
	40.47	0.308	9.36	49.135	0.146	0.903451
	40.449	0.319	9.374	49.195	0.147	0.903427
	40.373	0.302	9.441	49.2	0.14	0.902813
	40.264	0.291	9.428	48.912	0.145	0.902418
	40.514	0.328	9.7	48.917	0.149	0.899893
	40.585	0.317	9.804	48.937	0.15	0.898966
	40.6	0.309	9.863	48.991	0.15	0.89852
	40.371	0.303	9.892	49.025	0.151	0.898315
	40.5	0.317	9.906	48.978	0.153	0.898098
	40.369	0.303	9.884	48.809	0.153	0.897986
	40.284	0.295	9.916	48.718	0.151	0.897518
	40.39	0.251	9.936	48.793	0.146	0.897474
	40.232	0.301	9.928	48.573	0.153	0.897131
	40.307	0.315	9.947	48.644	0.152	0.89709
	40.489	0.306	10.004	48.734	0.154	0.896732
	40.486	0.273	10.056	48.744	0.161	0.89627
	40.407	0.301	10.045	48.667	0.155	0.896225
	40.086	0.293	10.014	48.515	0.154	0.896222
	40.417	0.315	10.054	48.631	0.156	0.896073
	40.206	0.297	10.072	48.574	0.155	0.895797
	40.35	0.31	10.099	48.664	0.156	0.89572
	40.277	0.304	10.067	48.508	0.153	0.895716
	40.365	0.297	10.126	48.721	0.153	0.89558
	40.226	0.299	10.082	48.495	0.153	0.895552
	40.275	0.295	10.114	48.601	0.156	0.89546
	40.029	0.294	10.087	48.403	0.154	0.895328
	40.437	0.288	10.203	48.604	0.157	0.894643
	40.424	0.344	10.208	48.612	0.163	0.894612
	40.278	0.304	10.17	48.388	0.155	0.894528
	40.495	0.3	10.248	48.71	0.159	0.894433
	40.403	0.284	10.242	48.659	0.156	0.894389
	40.598	0.288	10.311	48.637	0.159	0.89371
	40.355	0.284	10.389	48.533	0.159	0.892788
	40.137	0.269	10.376	48.332	0.159	0.89251
	40.318	0.297	10.406	48.448	0.156	0.892463
	40.195	0.253	10.42	48.508	0.161	0.892453
	40.034	0.286	10.387	48.314	0.158	0.892373
	40.489	0.295	10.483	48.439	0.16	0.891736
	40.359	0.268	10.545	48.373	0.162	0.891033
	40.255	0.264	10.562	48.244	0.16	0.890616
	40.218	0.25	10.791	48.186	0.17	0.88839
	40.401	0.256	10.9	48.37	0.169	0.88777
	40.172	0.354	10.829	48.051	0.164	0.887762
	40.329	0.348	10.911	48.085	0.172	0.887079
	40.177	0.31	11.314	47.688	0.169	0.882537
	40.443	0.31	11.515	47.882	0.175	0.881125
	40.131	0.361	11.732	47.669	0.176	0.878681
	39.951	0.328	11.721	47.422	0.174	0.878227
	40.103	0.256	12.47	47.001	0.187	0.870443
	39.774	0.319	12.653	46.593	0.173	0.867795
	39.964	0.322	12.893	46.679	0.179	0.865838
	39.571	0.296	14.256	45.441	0.199	0.850341
	40.34	0.321	10.416	48.368	0.158	0.892212
	40.383	0.308	10.57	48.408	0.163	0.890873
	40.068	0.312	10.592	48.135	0.167	0.890119
	40.387	0.283	10.722	48.232	0.171	0.889118
	40.507	0.28	10.758	48.338	0.17	0.889004
	39.891	0.314	10.71	48.06	0.165	0.888876
	40.285	0.277	10.765	48.126	0.171	0.888505
	40.102	0.28	10.78	48.115	0.171	0.888345
	40.412	0.279	10.771	48.058	0.171	0.88831
	40.241	0.287	10.762	48.017	0.172	0.888308
	40.291	0.27	10.803	48.173	0.173	0.888253
	40.095	0.305	10.815	48.052	0.17	0.887892
	40.253	0.281	10.814	48.035	0.17	0.887866
	40.26	0.279	10.848	48.111	0.172	0.887711
	40.049	0.272	10.861	48.102	0.172	0.887573
	40.128	0.28	10.845	48.026	0.172	0.887562
	40.379	0.281	10.884	48.132	0.171	0.887424
	40.442	0.287	10.858	48	0.171	0.887389
	40.04	0.266	10.836	47.902	0.173	0.887387
	40.16	0.267	10.888	48.12	0.173	0.887362
	40.033	0.269	10.879	48.056	0.172	0.887312
	40.238	0.265	10.893	48.111	0.174	0.887298
	40.429	0.261	10.906	48.132	0.172	0.887222
	40.461	0.269	10.918	48.129	0.173	0.887106
	40.062	0.271	10.873	47.922	0.174	0.887088
	40.252	0.268	10.922	48.13	0.172	0.887071
	40.418	0.271	10.937	48.116	0.173	0.886905
	40.127	0.283	10.903	47.938	0.172	0.886845
	40.222	0.27	10.92	48.003	0.17	0.886825
	40.411	0.278	10.976	48.204	0.174	0.886731
	40.333	0.282	10.962	48.13	0.173	0.886705
	40.23	0.273	10.936	48.001	0.173	0.886673
	40.24	0.271	10.971	48.068	0.174	0.886492
	40.191	0.289	10.957	47.997	0.172	0.886472
	40.217	0.272	10.973	48.066	0.174	0.88647
	40.086	0.275	10.963	47.996	0.174	0.886415
	40.35	0.27	10.978	48.01	0.176	0.886307
	40.186	0.267	10.948	47.864	0.175	0.886275
	39.997	0.261	11.004	48.072	0.174	0.886198
	39.984	0.26	11.004	48.063	0.176	0.886179
	40.151	0.273	10.992	48.009	0.176	0.886176
	40.217	0.267	11.01	48.085	0.174	0.886171
	40.26	0.265	10.992	47.998	0.176	0.886153
	40.182	0.272	10.984	47.954	0.173	0.886134
	40.151	0.276	10.978	47.913	0.173	0.886103
	40.304	0.268	10.987	47.949	0.172	0.886096
	40.544	0.272	11.007	47.998	0.173	0.886015
	40.08	0.269	11.009	47.965	0.175	0.885927
	39.99	0.267	11.003	47.882	0.173	0.885807
	40.148	0.288	11.055	48.062	0.173	0.88571
	40.341	0.266	11.03	47.933	0.175	0.885667
	40.01	0.268	11.048	47.995	0.173	0.885633
	40.293	0.267	11.054	47.955	0.175	0.885493
	40.124	0.273	11.051	47.927	0.173	0.885462
	40.193	0.271	11.13	48.134	0.176	0.885176
	40.148	0.269	11.082	47.905	0.172	0.885131
	40.076	0.263	11.071	47.853	0.173	0.885121
	40.097	0.263	11.069	47.839	0.173	0.88511
	40.185	0.263	11.1	47.938	0.174	0.885036
	40.239	0.268	11.081	47.847	0.174	0.885017
	40.159	0.265	11.114	47.969	0.175	0.884973
	39.812	0.261	11.137	47.836	0.173	0.884479
	40.092	0.269	11.138	47.778	0.176	0.884346
	40.125	0.269	11.153	47.785	0.173	0.884223
	40.127	0.265	11.263	47.915	0.176	0.883495
	39.925	0.264	11.348	47.701	0.176	0.882254
	39.887	0.267	11.325	47.604	0.175	0.882254
	40.145	0.27	11.428	47.788	0.176	0.881713
	40.192	0.264	11.386	47.589	0.178	0.881662
	40.283	0.264	11.461	47.636	0.176	0.881078
	40.002	0.269	11.506	47.521	0.178	0.880413
	41.27	0.36	6.86	51.3	0.16	0.928		Uner et al., 2021
	41.34	0.33	6.83	51.21	0.16	0.928
	41.27	0.29	7.59	50.88	0.16	0.923
	41.07	0.33	6.97	51.37	0.16	0.927
	40.85	0.31	7.21	51.37	0.17	0.925
	41.5	0.34	6.87	50.94	0.2	0.927
	40.86	0.32	6.96	51.49	0.18	0.927
	40.49	0.35	7.74	50.95	0.21	0.919
	40.88	0.29	6.98	51.58	0.16	0.927
	41.16	0.36	7.06	51.08	0.17	0.926
	41.59	0.33	6.6	51.09	0.17	0.93
	40.79	0.33	7.08	51.54	0.21	0.926
	40.64	0.3	7.26	51.62	0.16	0.925
	41.01	0.39	7.15	51.28	0.2	0.925
	40.04	0.44	7.43	51.79	0.18	0.923
	40.28	0.41	7.64	51.05	0.16	0.921
	41.14	0.32	7.32	50.77	0.17	0.923
	41.108	0.43	8.009	50.255	0.134	0.917		Gahlan et al., 2020
	41.069	0.45	8.053	50.394	0.136	0.917
	40.814	0.35	8.112	50.419	0.125	0.917
	41.299	0.379	6.858	50.938	0.201	0.929
	40.938	0.47	7.829	50.605	0.133	0.92
	40.948	0.459	8.108	50.053	0.129	0.916
	41.164	0.41	7.18	51.109	0.187	0.926
	40.778	0.489	8.004	50.525	0.146	0.918
	40.988	0.453	8.267	50.054	0.129	0.915
	40.633	0.436	8.33	50.097	0.116	0.914
	40.977	0.372	7.733	50.78	0.176	0.92
	40.984	0.393	8.301	49.998	0.116	0.914
	41.102	0.412	7.788	50.8	0.176	0.92
	41.077	0.401	8.101	50.259	0.138	0.917
	40.772	0.467	8.396	50.241	0.139	0.914
	40.948	0.429	7.959	50.089	0.117	0.918
	40.778	0.432	8.199	50.247	0.155	0.916
	41.365	0.446	7.096	50.929	0.195	0.927
	41.045	0.316	7.349	50.945	0.16	0.925
	40.845	0.387	7.556	50.778	0.169	0.923
	40.865	0.412	7.872	50.857	0.134	0.92
	40.892	0.451	8.149	50.151	0.121	0.916
	40.865	0.43	8.346	50.371	0.108	0.915
	40.581	0.42	8.269	50.075	0.115	0.912
	40.982	0.4	8.546	49.728	0.112	0.916
	40.297	0.37	8.112	50.212	0.134	0.924
	40.959	0.43	7.459	51.006	0.203	0.92
	40.939	0.391	8.472	49.683	0.127	0.912
	40.984	0.405	8.401	49.598	0.115	0.913
	41.093	0.42	8.406	49.444	0.127	0.913
	40.848	0.42	8.432	49.567	0.125	0.913
	40.946	0.362	7.925	50.074	0.213	0.918
	41.003	0.428	8.432	49.572	0.119	0.913
	41.094	0.433	8.436	49.664	0.137	0.913
	41.032	0.429	8.457	49.292	0.116	0.912
	40.877	0.408	8.444	49.458	0.132	0.912
	40.967	0.387	8.309	49.631	0.162	0.914
	41.034	0.361	7.339	50.312	0.168	0.924
	41.015	0.441	8.403	49.692	0.124	0.913
	40.771	0.424	8.715	49.345	0.139	0.909
	41.032	0.429	8.457	49.286	0.116	0.912
	40.967	0.387	8.309	49.631	0.162	0.941
	40.774	0.424	8.715	49.345	0.139	0.909
	41.003	0.493	8.44	49.78	0.131	0.913
	41.083	0.448	8.4	49.563	0.148	0.913
	40.93	0.45	8.457	49.372	0.111	0.912
	40.932	0.425	8.59	49.107	0.134	0.91
	40.951	0.434	8.495	49.347	0.151	0.91
	40.828	0.395	8.64	49.496	0.155	0.91
	41.05	0.348	8.59	49.412	0.116	0.91
	40.893	0.394	8.462	49.169	0.108	0.91
	41.049	0.419	8.534	49.494	0.124	0.918
	40.895	0.47	8.29	49.726	0.125	0.914
	40.714	0.484	8.345	49.438	0.119	0.913
	40.702	0.395	9.245	48.964	0.157	0.9
	41.179	0.402	8.69	49.173	0.112	0.909
	41.893	0.186	2.487	54.176	0.356	0.974
	41.91	0.187	2.697	54.54	0.276	0.973
	42.123	0.197	2.787	54.28	0.404	0.972
	42.003	0.218	3.084	53.46	0.711	0.968
	41.993	0.22	3.197	53.473	0.74	0.973
	41.984	0.182	3.138	53.798	0.329	0.975
	42.073	0.16	2.6	54.513	0.561	0.969
	42.203	0.12	2.436	54.336	0.398	0.971
	42.066	0.172	3.024	54.296	0.392	0.973
	42.096	0.164	2.694	54.583	0.24	0.97
	42.196	0.18	2.597	54.413	0.245	0.97
	42.05	0.46	5.7	51.31		0.94		Xiong et al., 2013
	42.17	0.41	5.55	51.54		0.942
	41.77	0.48	6.57	50.99		0.913
	42.26	0.47	6.1	51.24		0.936
	42.14	0.56	5.02	52.05		0.948
	42.05	0.46	5.93	51.39		0.938
	42.28	0.47	4.8	53.14		0.905
	42.02	0.47	5.39	52.08		0.919
	42.17	0.44	5.5	52.23		0.949
	42.09	0.44	5.26	52.7		0.901
	42.29	0.43	4.96	52.73		0.905
	42.02	0.46	5.19	52.39		0.903
	40.87	0.33	7.61	50.64		0.912
	40.96	0.33	7.87	50.48		0.918
	41.32	0.38	7.68	50.15		0.92
	40.84	0.29	8.44	50.44		0.913
	40.89	0.42	8.32	48.53		0.911
	40.98	0.35	7.98	50.05		0.916
	40.83	0.34	9.02	48.98		0.905
	40.82	0.28	9.11	48.93		0.904
	41.22	0.29	9.3	49.26		0.902
	40.69	0.33	9.11	48.84		0.903
	40.84	0.27	9.46	49.03		0.9
	41.9	0.31	9.32	49.2		0.9
	41.6	0.89	3.74	53.09		0.96
	42.36	0.88	4.07	52.49		0.958
	41.95	0.84	3.46	53.09		0.968
	41	0.87	3.76	52.89		0.96
	40.96	0.46	7.57	50.35		0.92
	41.31	0.42	7.95	49.38		0.916
	40.85	0.34	7.65	49.98		0.92
	41.19	0.42	8.84	48.96		0.9
	41.19	0.4	7.64	49.76		0.919
	41.17	0.34	7.9	49.79		0.917
	41.29	0.24	8.57	49.99		0.91
	41.16	0.38	7.83	50.21		0.919
	41.44	0.32	8.75	50.14		0.91
	41.25	0.32	8	50.04		0.917
	41.26	0.32	7.94	50.41		0.918
	41.39	0.29	8.22	50.16		0.915
	41.77	0.3	9.38	48.79		0.9
	41.39	0.28	9.47	48.57		0.9
	41.52	0.31	9.66	49.44		0.899
	41.56	0.3	9.54	49.2		0.9
	41.27	0.3	9	49		0.905
	41.35	0.46	8.96	47.43	0.11	0.903		Zhou et al., 2005
	40.5	0.44	9.57	49.36	0.15	0.9
	40.76	0.39	8.86	49.52	0.22	0.906
	40.82	0.62	9.44	50.03	0.26	0.901
	40.59	0.44	8.88	49.9	0.23	0.907
	41.42	0.49	7.88	50.94	0.08	0.919
	41.51	0.37	8.6	50.52	0.06	0.912
	40.37	0.41	9.07	48.67	0.27	0.902
	40.77	0.41	9.56	49.44	0.14	0.9
	40.66	0.69	7.96	50.42	0.05	0.918
	41.11	0.52	8.17	50.77	0.12	0.916
	41.12	0.36	6.11	52.13	0.06	0.937
	42.09	0.61	6.27	52.85	0.23	0.935
	41.39	0.56	7.08	52.32	0.06	0.923
	41	0.25	7.55	50.66	0.13	0.926
	42.22	0.66	4.29	54.01	0.14	0.956
	41.51	0.48	4.56	52.38	0.15	0.951
	41.85	0.88	3.21	54	0.05	0.967
	41.28	0.57	4.76	51.67	0.07	0.95
	41.25	0.61	5.9	52.4	0.01	0.94
	43.36	0.29	5.32	51.58	0.08	0.945		Zaeimnia et al., 2016
	43.37	0.53	3.49	53.76	0.01	0.965
	41.16	0.39	6.94	52.98	0.1	0.93
	41.68	0.36	8.21	52.48	0.07	0.919
	41.98	0.26	8.25	51.45	0.19	0.918
	41.94	0.43	11.17	47.35	0.21	0.889
	38.83	0.32	10.55	50.59	0.21	0.895
	37.858	0.417	21.88	38..98	0.49	0.74		Yadav and Das, 2022
	34.68	0.381	20.08	43.35	0.54	0.76
	39	0.283	14.2	45.35	0.148	0.84
	37.6	0.225	16.79	44.13	0.17	0.84
	38.04	0.253	15.35	45.23	0.197	0.85
	37.23	0.31	18.57	43.91	0.196	0.83
	39	0.33	15.68	43.73	0.194	0.86
	37	0.33	15.11	46.023	0.124	0.83
	43.23	0.37	9.74	47.09		0.896		Rogkala et al., 2019
	42.1	0.51	9.14	46.94		0.901
	42.29	0.85	9.78	45.53		0.89
	41.82	0.29	9.48	47		0.892
	43.16		9.61	48.18		0.898
	43.4		10.13	47.2		0.899
	42.79		10.25	45.98		0.892
	42.57	0.76	8.86	46.62		0.889
	41.66	0.41	9.26	48.62		0.904
	42.03	0.38	10.24	46.27		0.904
	41.38	0.61	9.6	46.55		0.89
	41.32	0.48	9.48	47.76		0.896
	45.9		8.87	44.54		0.9
	42	0.48	9.24	46.63		0.9
	41.61	0.4	9.56	51		0.905		Ngo et al., 2015
	41.09	0.3	9.44	51.47		0.907
	40.35	0.25	10.28	51		0.898
	40.84	0.27	8.94	49.42		0.908
	41.47	0.4	8.85	47.68		0.906
	41.29	0.31	9.16	50		0.907
	42.25	0.41	9.51	51.46		0.906
	41.33	0.21	8.64	49.35		0.911
	41.4	0.22	8.4	49.05		0.912
	40.25	0.33	8.79	49.27		0.909
	41.45	0.22	8.78	49.78		0.91
	41.01	0.26	7.97	51		0.919
	41.08	0.26	7.88	50.52		0.92
	41.09	0.32	7.62	51.3		0.923
	41.09	0.31	9.07	49		0.906
	41.41	0.28	7.88	50.77		0.92
	41.91	0.33	8.31	49.64		0.914
	41.83	0.33	8.77	49.21		0.909
	41.83	0.3	7.83	50.05		0.919
	41.79	0.35	3.75	52.51	0.67	0.954		Lasheen et al., 2021
	41.98	0.32	4.92	51.66	0.59	0.943
	40.97	0.29	5.88	52.19	0.43	0.936
	39.12	0.36	7.32	51.94	0.79	0.919
	40.12	0.42	5.46	52.14	0.99	0.935
	42.15	0.29	5.73	50.3	0.09	0.939
	40.66	0.28	4.98	52.56	0.63	0.93
	41.31	0.36	4.31	52.71	0.49	0.951
	42.33	0.34	1.69	55.52	0.18	0.981
	40.66	0.37	1.87	55.92	0.17	0.98
	40.29	0.33	3.92	51.36	0.61	0.952
	40.36	0.89	3.75	52.72	0.69	0.954
	41.69	0.92	3.12	52.13	0.54	0.962
	41.36	0.55	4.19	51.66	0.48	0.951
	40.59	0.62	3.72	52.92	0.46	0.957
	42.32	0.41	3.62	51.17	0.29	0.958
	42.77	0.35	2.96	52.46	0.27	0.966
	41.36	0.29	4.06	52.33	0.43	0.954
	40.62	0.37	4.31	52.12	0.58	0.949
	41.68	0.44	3.59	52.62	0.42	0.959
	41.4	0.4	8.6	49.3		0.911		Xiong et al., 2018
	40.9	0.4	8.5	49.5		0.912
	41.2	0.3	8.6	49.1		0.911
	41.2	0.3	8.8	49.2		0.909
	40.9	0.3	8.7	49.4		0.91
	41	0.4	8	50		0.918
	41.6	0.2	8	49.7		0.918
	41.5	0.3	8.2	49.1		0.914
	41.2	0.3	8.5	49.5		0.912
	40.8	0.4	8	49.7		0.917
	39.81	0.38	13.78	45.98	0.18	0.85		Bağcı et al., 2005
	39.88	0.44	13.57	46.48	0.24	0.857
	39.66	0.32	13.38	46.4	0.18	0.852
	38.84	0.19	17.53	42.91	0.22	0.811
	39.15	0.12	16.94	42.86	0.27	0.816
	39.06	0.24	16.71	43.36	0.25	0.82
	39.76	0.35	14.23	45.58	0.2	0.849
	41.17	0.1	9.87	49.26	0.12	0.899		Rahmani et al., 2017
	41.19	0.39	10.33	48.74	0.06	0.894
	39.97	0.16	12.3	47.01	0.25	0.87
	40.05	0	16.06	43.87	0	0.83
	40.3	0.07	17.6	44.7	0	0.819

## Sheet: Opx
Sample	SiO2	Al2O3	Cr2O3	FeO	MgO	CaO	Mg #		References
	56.437	2.0368	0.6105	5.9768	33.7568	1.4228	0.927		Modjarrad et al., 2025
	56.7664	2.0461	0.7803	5.9441	33.7061	1.9463	0.933
	56.0849	2.0066	0.7125	5.8456	33.4754	2.0617	0.938
	55.8328	1.903	0.7076	6.0599	33.3259	1.9739	0.937
	55.9224	1.9373	0.6168	5.7192	32.7825	2.7832	0.934
	56.3806	1.7963	0.6253	6.134	33.8841	1.1739	0.927
	55.0452	1.7881	0.7148	5.6057	32.4624	3.1187	0.949
	55.247	1.5605	0.7065	6.1478	34.2388	0.9603	0.954
	55.4199	2.0968	0.693	6.1033	34.0994	0.7186	0.944
	57.1366	2.0162	0.717	5.8398	33.1622	2.4339	0.918
	55.9112	1.9373	0.6592	5.6692	32.0557	3.4788	0.928
	55.2041	1.8654	0.748	6.0495	34.1061	1.2265	0.956
	56.6014	2.0075	0.6961	6.0137	33.2169	1.9922	0.92
	56.28	2.506	0.7159	5.9178	32.6326	3.1806	0.908
	56.7558	2.4425	0.7417	6.1036	33.7382	1.2922	0.908
	56.1085	2.652	0.6353	6.1733	33.3242	1.3759	0.906
	56.4632	2.6137	0.767	6.246	33.1053	1.6727	0.904
	56.5837	2.4705	0.7372	5.9315	33.4659	1.4092	0.91
	55.1756	2.3648	0.7004	6.0114	33.4654	1.6464	0.908
	56.3429	2.5304	0.7323	6.059	33.6077	1.8911	0.908
	56.9772	2.356	0.7516	5.7527	33.8503	1.6598	0.913
	56.5795	2.6881	0.7283	6.0926	33.3931	1.6816	0.907
	55.2502	2.3142	0.7273	5.9212	33.6303	1.0378	0.91
	56.2379	2.1527	0.6233	5.9043	33.675	1.6962	0.91
	55.66	2.1039	0.5429	6.0486	33.8098	1.2222	0.909
	56.2916	2.5812	0.7267	5.9801	33.0706	2.3484	0.908
	56.645	2.5556	0.7429	5.8204	32.7742	2.2421	0.909
	55.2034	2.5648	0.8847	5.9871	33.2061	1.9253	0.908
	55.2997	2.4739	0.768	5.9405	33.9663	1.5513	0.911
	55.9595	2.2367	0.8373	5.7605	33.9373	1.4072	0.913
	55.5949	2.3706	0.7591	5.9674	34.2794	1.5682	0.911
	55.5896	2.6549	0.8945	5.9789	33.5075	1.4693	0.909
	54.7915	2.4351	0.7407	6.1681	34.0197	1.8247	0.908
	55.9129	2.4011	0.8738	5.8674	33.1075	2.5633	0.91
	54.8207	1.9599	0.7508	5.4362	31.7881	4.3338	0.912
	56.448	2.3693	0.7972	6.1028	33.7069	1.7195	0.908
	57.807	2.208	0.865	6.3195	34.1733	1.3206	0.906
	57.9647	2.2051	0.7536	6.0298	34.0971	1.5655	0.91
	57.5232	2.1626	0.7951	6.3587	34.4973	0.6367	0.906
	56.7083	1.8546	0.515	6.227	34.0892	1.0768	0.907
	57.2205	1.8548	0.6564	5.4338	32.7803	3.2346	0.915
	57.2264	1.8347	0.7428	6.1915	33.7999	1.7028	0.907
	56.6556	2.0947	0.5503	6.1008	34.0641	1.4906	0.909
	57.3666	1.9229	0.5638	5.8053	33.6479	1.5751	0.912
	57.5749	1.8937	0.8473	6.0085	34.106	1.2846	0.91
	56.3658	2.0973	0.846	5.7277	33.8919	1.4307	0.913
	56.9895	2.0735	0.6951	5.5594	33.3078	2.2287	0.914
	57.8896	1.9954	0.6721	5.9372	34.0163	1.3037	0.911
	56.5474	2.7006	0.4966	6.2642	34.8875	0.5981	0.908
	54.0013	3.0232	0.4434	6.6359	33.8864	0.7339	0.901
	53.9008	3.636	0.7598	6.6833	33.596	0.7105	0.9
	56.1705	3.704	0.8065	6.1749	32.1959	2.2678	0.903
	55.4095	3.4647	0.743	6.433	33.5552	0.8745	0.903
	54.8419	3.7093	0.7098	6.4836	33.3225	0.7943	0.902
	56.0215	3.529	0.6256	6.7366	33.7051	0.9314	0.899
	54.8705	3.2758	0.8209	6.6857	33.8154	0.4565	0.9
	54.0489	4.432	0.918	6.6291	32.5948	0.7905	0.899
	53.7607	3.9753	0.507	6.4358	33.9605	0.6129	0.904
	54.3792	3.0633	0.6974	6.8213	33.3693	0.3693	0.9
	57.05	1.38	0.19	4.85	34.52	1.71	0.94		Uner, 2021
	56.87	1.28	0.21	4.59	34.27	1.55	0.93
	56.83	1.65	0.18	4.62	33.37	2.68	0.93
	56.97	1.57	0.24	4.48	34.78	0.93	0.93
	57.06	1.37	0.19	4.62	34.73	1.15	0.93
	56.76	1.61	0.25	4.49	34.06	1.72	0.93
	57.2	1.04	0.2	5.06	34.59	1.21	0.93
	56.83	1.39	0.19	5.04	34.3	1.36	0.93
	57.04	1.04	0.22	5.25	34.42	1.18	0.92
	57.31	1.02	0.3	4.36	35.11	1.03	0.94
	57.07	1.34	0.19	4.57	34.23	1.74	0.93
	56.95	1.34	0.24	4.47	34.62	1.21	0.93
	56.839	1.536	0.547	5.637	34.181	0.597	0.915		Gahlan et al., 2020
	57.018	1.515	0.505	5.751	34.46	0.647	0.914
	56.876	1.369	0.493	5.619	34.373	0.563	0.916
	56.714	1.597	0.621	5.595	34.088	0.57	0.915
	56.989	1.361	0.452	5.561	34.285	0.628	0.917
	56.991	1.422	0.457	5.449	34.413	0.527	0.918
	56.835	1.44	0.491	5.661	34.34	0.597	0.915
	56.616	1.354	0.485	5.775	34.363	0.579	0.913
	57.041	1.477	0.721	5.419	34.181	0.952	0.918
	56.994	1.333	0.543	5.541	34.262	0.574	0.916
	57.174	1.481	0.717	5.248	34.088	1.018	0.92
	56.951	1.374	0.472	5.56	34.232	0.665	0.916
	48.863	1.263	0.508	4.536	29.242	0.993	0.919
	57.025	1.354	0.402	5.568	34.347	0.612	0.916
	57.181	1.482	0.785	5.327	33.986	1.034	0.919
	56.799	1.403	0.509	5.616	34.167	0.586	0.915
	57.292	1.484	0.781	5.191	33.861	1.043	0.92
	56.81	1.487	0.464	5.701	34.413	0.589	0.914
	57.205	1.561	0.769	5.194	34.081	1.067	0.912
	56.791	1.411	0.512	5.657	34.497	0.652	0.915
	56.812	1.504	0.843	5.252	34.026	1.017	0.92
	57.015	1.485	0.685	5.37	34.181	1.005	0.919
	57.48	1.524	0.801	5.16	34.041	1.06	0.926
	57.03	1.578	0.745	5.235	33.936	1.081	0.92
	57.226	1.516	0.805	5.353	34.092	1	0.919
	57.105	1.458	0.731	5.11	34.191	1.019	0.922
	56.345	1.488	0.776	5.365	34.171	1.024	0.919
	57.08	1.459	0.843	5.22	34.141	0.994	0.921
	57.185	1.468	0.766	5.295	34.126	0.992	0.919
	57.315	1.469	0.801	5.4	34.021	1.052	0.918
	56.935	1.479	0.774	5.355	33.821	1.094	0.918
	57.35	1.489	0.783	5.07	33.891	0.994	0.922
	57.29	1.556	0.783	5.165	34.301	1.056	0.922
	56.915	1.55	0.927	5.25	34.221	0.972	0.92
	56.71	1.459	0.759	5.255	33.951	1.064	0.92
	55.03	4.11	0.84	6.18	32	1.67	0.903		Xiong et al., 2013
	55.49	3.84	0.76	5.99	32	1.51	0.906
	55.53	4.05	0.87	6.08	31.6	2.29	0.903
	54.94	3.99	0.7	6.33	31.8	1.42	0.9
	54.26	4.2	0.83	5.49	30.97	2.09	0.91
	55.28	3.86	0.76	6.02	31.98	1.66	0.905
	57.36	1.21	0.26	6.16	34.1	0.45	0.908
	56.66	1.79	0.51	6.02	33.09	0.81	0.908
	56.72	1.63	0.41	6.12	33.6	0.86	0.908
	56.22	1.95	0.63	6.15	33.5	0.86	0.907
	56.93	1.41	0.7	6.24	33.68	0.45	0.906
	57	1.28	0.62	6.03	33.93	0.43	0.91
	57.1	1.42	0.41	6.23	33.05	0.43	0.904
	57.5	1.42	0.45	6.39	33.26	0.77	0.9
	55.79	3.29	0.8	6.44	32.16	0.78	0.89
	55.6	3.47	0.81	6.51	32.29	0.65	0.898
	55.78	3.21	0.76	6.51	32.23	0.51	0.9
	56.42	2.41	0.6	6.31	32.54	0.59	0.91
	57	1.97	0.25	6.32	34.07	0.87	0.91
	56.38	2.24	0.47	5.86	33.02	0.48	0.91
	56.58	1.62	0.53	5.84	34.43	0.91	0.91
	56.85	1.86	0.83	5.91	33.35	0.28	0.9
	55.66	1.8	0.38	6.17	34.42	0.6	0.9
	56.44	2.11	0.52	6.09	33.61	0.69	0.9
	56.1	2.14	0.43	6.31	33.86	0.75	0.9
	56.86	1.89	0.36	6.43	33.68	0.7	0.91
	56.51	2.09	0.45	6.22	33.76	0.67	0.91
	56.12	2.22	0.59	6.16	32.87	0.67	0.9
	55.79	2.12	0.47	6.42	33.26	0.91	0.91
	56.14	2.21	0.49	6.24	33.7	0.69	0.95
	57.35	0.78	1.43	3.39	35.79	0.76	0.94
	56.68	1.06	1.44	3.65	35.06	0.13	0.95
	57.79	0.62	0.93	3.42	36.87	0.73	0.95
	58.11	0.53	0.92	3.24	36.39	0.31	0.94
	57.59	0.7	0.9	3.62	36.02	0.44	0.94
	57.51	0.74	1.13	3.46	36.02	0.58	0.94
	55.76	2.95	0.65	4.81	33.19	2.6	0.879		Zhou et al., 2005
	55.51	3.4	0.34	6.45	33.5	0.86	0.887
	55.03	3.71	0.65	6.18	33.15	0.85	0.89
	55.17	3.62	0.65	6.16	33.22	0.48	0.897
	55.59	3.2	0.6	5.95	33.67	0.99	0.89
	56.24	1.74	0.42	5.82	34.17	0.64	0.9
	56.02	1.79	0.57	5.72	33.92	1.16	0.89
	54.73	3.67	0.68	6.26	32.99	0.71	0.89
	56.47	2.68	0.75	4.94	35.22	0.74	0.91
	56.65	1.95	0.73	5.91	34.41	1.24	0.89
	57.73	0.52	0.14	5.13	35.65	0.25	0.92
	56.43	1.74	0.58	5.56	34.09	0.74	0.9
	55.58	3.85	0.81	6.39	33.57	0.48	0.895
	56.74	1.6	0.61	4.68	35.3	0.81	0.917
	56.34	2.39	0.65	4.9	34.6	0.99	0.91
	56.8	1.58	0.63	5.03	34.73	0.96	0.91
	58.72	0.8	0.58	2.76	37.07	0.52	0.95
	57.72	0.77	0.82	4.03	36.89	0.31	0.93
	57.64	0.89	0.48	3.9	36.53	0.24	0.94
	57.49	0.82	0.44	4.21	36.81	0.28	0.93
	56.67	1.19	0.48	5.42	35.54	1.42	0.921		Zaeimnia et al., 2016
	56.25	2.38	0.76	5.87	35.39	0.8	0.915
	57.91	4.48	0.33	6.18	31.93	0.53	0.902		Rogkala et al., 2019
	57.57	4		6.55	31.97	0.45	0.89
	58.34	3	0.49	6.63	32.55		0.89
	56.62	4.84		6.58	31.67	0.52	0.89
	55.45	4	0.32	5.95	31.29	0.27	0.9
	57.6	4		5.98	32.57	0.43	0.91
	56.35	4.63	0.42	6.06	31.15	0.72	0.9
	56.27	5		6.48	32.28	1.1	0.899
	57.15	4.46	0.57	6.32	32.65	0.45	0.9
	56.41	2.94	0.33	6.35	32.18	0.42	0.9
	57.17	3.35	0.56	6.36	32.54	0.6	0.9
	56.35	3.86	0.11	6.46	33.11	0.29	0.9
	56.06	4.24	0.37	6.19	31.66	0.32	0.9
	55.81	2.75	0.75	5.6	34.21	0.52	0.916		Ngo et al., 2015
	55.65	2.34	0.84	5.37	34.5	0.81	0.92
	55.74	2.66	1.02	5.47	33.95	0.77	0.917
	54.98	2.62	0.85	5.27	35.12	0.62	0.917
	55.12	2.65	0.36	4.6	34	0.61	0.921
	56.25	2.24	0.58	5.23	34.58	0.52	0.922
	55.43	2.45	0.54	5.1	34.66	0.84	0.929
	56.1	2.31	0.82	4.69	35	0.42	0.922
	55.75	2.55	0.7	5.03	34.34	0.66	0.924
	55.64	2.61	0.93	5.24	34.36	0.67	0.93
	57.4	0.9	0.4	5.5	34.6	0.8	0.919		Xiong et al., 2018
	57.5	0.9	0.5	5.3	34.1	1.2	0.919
	57.2	0.9	0.3	5.9	34.1	1	0.91
	57.3	0.9	0.4	6	34	0.5	0.91
	57.3	0.8	0.4	6.2	34.4	0.7	0.908
	57.2	0.9	0.4	5.9	34.5	0.7	0.913
	56.8	0.9	0.4	6.2	34.2	0.9	0.908
	56.1	1.9	1.1	6.1	32.9	0.9	0.906
	55.9	1.7	0.7	6.3	32.6	1.6	0.9
	56.1	0.7	0.3	4.3	36.9	0.6	0.939
	56.44	1.99	0.55	6.11	34.31	0.96	0.93		Rahmani et al., 2017
	55.73	1.99	0.58	6.19	33.46	1.02	0.91
	55.39	1.97	0.53	7.56	33.69	0.85	0.92
	55.2	1.56	0	10.07	31.9	1.16	0.9

## Sheet: Cpx
Sample	SiO2	Al2O3	Cr2O3	FeO	MgO	CaO	Mg #		References
	52.9605	2.3841	0.9869	2.185	17.2897	23.8349	0.934		Modjarrad et al., 2025
	53.7572	1.7609	0.8139	2.0314	17.7457	24.1353	0.94
	52.6265	2.1785	0.9869	2.1145	17.2886	23.8036	0.936
	53.099	2.0314	0.8992	2.1555	17.8912	23.5505	0.937
	53.1866	2.564	1.1252	2.7082	18.628	22.3039	0.925
	53.2161	2.5969	1.0873	2.4452	17.4905	24.0067	0.927
	52.9999	2.2576	1.0447	2.1165	17.3317	23.6899	0.936
	53.7378	2.5225	1.1332	3.0365	19.2975	20.5408	0.919
	53.1524	2.544	1.1319	2.626	17.6973	22.4934	0.923
	52.1529	2.6475	1.1823	2.4297	17.1528	23.3272	0.926
	53.0795	2.6905	1.1353	2.0111	17.1685	23.9163	0.938
	53.3254	2.063	0.9426	2.232	17.5118	23.6611	0.933
	51.4819	3.1958	1.2577	2.1117	17.1227	23.3246	0.935
	53.3777	2.5947	0.9592	2.6532	18.6797	22.1875	0.926
	53.5387	2.3173	0.8864	2.0258	17.395	24.3894	0.939
	52.7419	2.8842	1.0205	2.2019	17.4098	23.5519	0.934
	53.1734	3.1835	0.9975	2.7029	18.6297	21.6742	0.925
	53.1767	3.0587	1.096	2.3374	17.7207	22.6867	0.931
	52.3217	3.0031	1.0614	2.5402	18.3501	22.329	0.928
	52.3926	3.3302	1.2314	2.2298	17.068	23.6419	0.932
	52.9869	3.0868	1.1814	2.3669	17.6219	23.1484	0.93
	53.4618	2.9486	1.0703	2.9488	18.3541	21.8102	0.917
	53.2036	3.0306	1.1217	3.4765	20.227	18.9978	0.912
	54.5298	3.129	1.1106	4.1426	22.9055	15.9214	0.908
	53.0644	2.8625	1.0101	2.395	17.611	23.609	0.929
	52.7263	2.9688	1.2061	2.2796	17.3638	24.1127	0.931
	51.4421	3.0555	1.2293	3.1414	18.9327	22.1589	0.912
	53.2514	3.3279	1.2476	2.5185	17.9224	23.0515	0.927
	52.9262	3.2622	1.1817	2.5618	17.8381	22.7074	0.925
	53.8285	2.7143	1.0553	2.8694	20.1645	20.4219	0.926
	54.1479	2.756	1.0275	2.9235	19.6964	21.6228	0.923
	54.8292	2.6973	1.0328	2.5335	19.3841	22.1238	0.932
	53.4566	2.9363	1.1165	3.1772	19.2872	20.7205	0.915
	52.6682	2.6801	1.2008	2.4788	18.5377	22.1378	0.93
	52.6012	2.9605	1.1255	2.6591	17.5001	23.2935	0.921
	52.8374	2.9217	1.1746	3.0701	19.4907	19.8313	0.919
	53.6439	2.7857	1.0934	2.4208	17.2774	23.4092	0.927
	54.1781	2.4899	1.171	2.5256	18.9019	21.6682	0.93
	54.4731	2.1239	0.7757	2.4249	18.757	22.2548	0.932
	53.8888	2.5896	1.1794	2.4951	18.3749	21.7185	0.929
	52.5535	2.4259	1.1111	3.4751	21.2726	18.949	0.916
	54.6651	2.367	0.9886	2.0282	17.6078	24.0289	0.939
	54.4071	2.2881	0.986	2.3397	18.204	22.6025	0.933
	53.6313	1.83	0.9725	2.0447	17.9133	24.3362	0.94
	55.1181	1.6605	0.7287	1.9238	17.6945	24.3607	0.943
	54.5276	2.5954	1.3821	2.7526	18.5631	21.4713	0.923
	53.4	2.3339	1.1599	2.5578	17.9017	21.6699	0.926
	54.2519	2.4584	1.0733	3.0293	20.5803	19.2974	0.924
	54.8581	2.4559	0.8618	3.9287	21.9558	17.7575	0.909
	54.418	2.6678	1.1556	3.0761	19.3936	20.3137	0.918
	53.0036	2.5777	1.1304	2.886	19.3082	19.8388	0.923
	53.1089	2.5541	1.1148	2.8087	18.733	21.1111	0.922
	52.8366	2.3104	1.2027	2.5033	19.7726	21.5239	0.934
	51.4536	4.5612	1.1557	2.7913	16.6355	23.3498	0.914
	51.1639	4.3156	1.155	2.5627	16.6735	23.5185	0.921
	51.9356	4.7375	1.1132	2.9421	17.2319	22.466	0.913
	53.1216	3.9783	0.9591	3.1403	18.4495	21.9785	0.913
	51.8812	3.6944	0.8372	2.7566	17.7082	23.3638	0.92
	53.0711	1.8062	0.2812	2.4144	18.1959	23.9704	0.931
	51.4525	3.5448	0.6852	2.3739	16.4551	24.5567	0.925
	51.9883	3.7752	0.9704	2.4448	16.721	24.0991	0.924
	50.3174	4.8783	1.2574	2.9401	16.68	22.9331	0.91
	52.8737	1.4482	0.1453	2.306	17.7452	23.808	0.932
	53.6435	2.6385	1.0473	2.8538	17.2835	22.6531	0.915
	52.7462	3.1159	1.2302	2.9825	17.9638	22.0449	0.915
	52.9457	2.6063	1.103	2.6122	17.657	22.339	0.923
	52.6197	3.1194	1.2165	2.8972	17.2064	22.1953	0.914
	53.2909	2.8861	1.1715	2.7023	17.2259	22.8987	0.919
	52.9576	3.1111	1.3603	2.8457	17.5379	22.2459	0.917
	51.2251	4.2608	1.6099	2.7827	16.4193	22.8806	0.913
	50.5055	5.239	1.5741	2.8293	15.6962	22.9937	0.908
	51.3372	3.7994	1.464	3.0436	17.4846	21.168	0.911
	52.5723	3.7973	1.6033	2.6354	16.8231	22.784	0.928
	53.7715	2.5295	0.9821	2.8974	17.9284	21.9022	0.925
	52.5802	3.2845	1.2162	2.8416	16.9666	22.6877	0.914
	51.7457	3.3972	1.2368	3.2676	18.4079	20.8732	0.909
	53.8655	3.1077	1.1826	2.7371	17.1204	22.8448	0.918
	53.5278	3.2958	1.3679	2.6015	17.7292	22.3723	0.924
	52.9045	3.2606	1.4319	2.8153	16.7926	22.3691	0.914
	52.8297	3.098	1.2702	2.6101	16.5966	23.1336	0.919
	52.6172	3.4551	1.4531	2.9234	17.4819	21.7536	0.914
	53.5085	3.3121	1.2631	2.9065	17.5083	22.0865	0.915
	53.135	3.4054	1.3582	2.9266	17.4614	21.892	0.914
	52.308	3.5688	1.4211	2.8064	16.6587	23.0161	0.914
	51.176	2.1859	1.1963	2.6489	16.2759	23.4683	0.916
	50.9989	4.4418	1.6628	2.604	16.4097	22.6448	0.918
	51.5859	2.6463	1.1299	2.6157	16.3894	22.637	0.918
	50.8658	2.9119	1.2979	2.883	16.3928	22.4313	0.91
	50.3278	3.1705	1.2401	2.9717	18.9642	19.8944	0.919
	53.1052	3.31134	1.21134	2.72268	17.068	22.3402	0.942		Modjarrad et al., 2024
	52.9588	3.92474	1.42371	2.71237	16.901	22.1742	0.94
	53.2948	3.49588	1.34021	2.71546	17.0381	22.1876	0.939
	53.3	3.51856	1.30206	2.76495	17.2619	22.2072	0.947
	53.3454	3.17423	1.16392	2.70928	17.4361	22.4897	0.954
	53.6361	3.13299	1.10825	2.86907	17.8216	21.9082	0.94
	53.7175	3.05567	1.16495	2.83196	17.5144	22.3701	0.935
	53.634	3.01753	1.11031	2.7732	17.5268	22.3134	0.936
	53.6247	3.01753	1.12062	2.68969	17.5526	22.4567	0.941
	53.7784	2.94742	1.12062	2.62887	17.7495	22.3691	0.953
	53.6557	2.89381	1.07423	2.55876	17.5474	22.4598	0.945
	53.9495	2.95052	1.10722	2.58144	17.3732	22.6309	0.934
	53.6495	2.90825	1.10412	2.50309	17.4753	22.6784	0.949
	53.9856	2.81856	1.12268	2.60309	17.6258	22.5124	0.944
	51.745	3.327	1.263	2.675	16.662	22.387	0.959
	52.9296	2.66429	0.99898	2.85714	17.8	21.4122	0.958
	53.945	1.534	0.321	2.177	17.57	23.66	0.935		Gahlan et al., 2020
	53.866	1.689	0.447	2.112	17.49	23.8	0.936
	53.815	1.794	0.407	1.982	17.815	23.89	0.941
	54.165	1.434	0.347	2.067	17.93	23.52	0.939
	53.705	1.329	0.396	2.062	18.575	23.18	0.941
	53.825	1.844	0.435	2.317	17.487	23.66	0.903
	54.01	1.429	0.362	2.037	17.68	23.82	0.939
	53.385	1.824	0.571	2.482	17.727	23.295	0.927
	53.705	1.624	0.682	2.282	17.522	23.375	0.931
	53.292	2.024	0.622	2.307	18.245	22.935	0.938
	54.312	1.779	0.692	2.002	17.465	23.234	0.937
	53.67	2.149	0.565	2.241	17.845	22.965	0.934
	53.83	1.969	0.601	2.162	17.852	22.695	0.934
	54.31	2.054	0.452	2.245	17.74	22.91	0.933
	51.09	5.45	1.45	3.39	17.55	20.85	0.903		Xiong et al., 2013
	52.21	3.66	0.81	2.94	16.96	23.54	0.912
	51.14	4.72	1.13	3.37	18.16	20.42	0.906
	52	4.09	1.06	3.04	17.46	22.67	0.918
	52.04	4.24	1.24	3.03	16.59	22.9	0.908
	51.36	4.6	1.18	3.1	17.16	21.96	0.91
	53.32	1.41	0.62	2.09	17.35	24.67	0.937
	52.7	2.23	0.99	2.23	17.18	24.36	0.932
	53.08	1.11	0.39	2.09	17.29	24.91	0.937
	53.42	1	1.07	2.06	18.17	22.88	0.94
	52.78	1.87	0.78	2.2	17.43	23.67	0.934
	52.86	1.69	0.72	2.26	17.38	24.17	0.932
	52.97	2.07	1.03	2.3	17.52	23.48	0.931
	54.72	1	0.55	1.71	18.02	23.29	0.949
	53.35	1.38	0.65	1.77	17.65	24.23	0.946
	54.62	1.64	0.78	1.88	17.98	22.94	0.944
	53.03	1.91	1	1.79	16.78	24.82	0.943
	53.88	1.58	0.79	1.88	17.64	23.67	0.943
	52.91	1.7	0.48	2.21	16.87	25.27	0.932
	52.5	1.65	0.94	2.26	16.84	24.99	0.93
	53.1	1.31	0.43	2.3	17.92	24.15	0.933
	53.42	1.54	0.51	1.98	17.24	24.69	0.939
	52.73	1.53	0.52	2.32	17.36	24.73	0.941
	52.98	2.11	0.7	2.7	17.12	24.42	0.93
	53.19	2.17	0.6	2.8	17.34	23.99	0.92
	53.48	2.15	0.63	2.66	17.62	24.03	0.919
	53.11	2.23	0.96	2.62	17.46	23.91	0.922
	52.67	1.96	0.57	2.56	17.96	23.26	0.925
	52.22	2	1.09	2.48	16.99	24.01	0.922
	52.67	2.29	0.71	1.59	17.65	23.93	0.927
	53.68	1.14	1.69	1.13	17.66	24.32	0.952
	54.38	0.55	1.33	1.77	17.61	25.53	0.965
	52.06	2.3	1.45	1.55	19	22.62	0.95
	53.9	1.21	1.53	0.63	17.44	24.43	0.952
	54.48	0.27	1.4	1.33	17.98	26.34	0.98
	53.7	1.09	1.48	1.35	17.94	24.65	0.96
	52.65	3.12	0.8	1.78	16.84	24.4	0.92		Zhou et al., 2005
	52	3.99	1.05	2.49	17.26	24.41	0.923
	52.38	3.84	1.13	2.42	16.68	25.21	0.89
	52.84	2.23	0.75	1.9	17.67	25.75	0.94
	54	2.01	0.88	1.6	18.5	24.37	0.98
	52.56	3.35	0.66	2.36	17.08	25.26	0.91
	53.19	1.16	0.86	1.77	17.77	25.71	0.957
	52.21	3.63	1.23	2.08	16.44	25.11	0.886
	53.68	1.27	0.61	1.7	17.82	25.84	0.954
	51.78	4.34	1.23	2.16	16.13	26.19	0.86
	54.5	1.15	0.63	1.54	18.1	25.48	0.96
	54	2	0.93	2.1	19.2	23.32	0.99
	53.9	1.74	0.54	1.58	17.89	26	0.95
	54.02	1.07	0.78	1.38	17.86	23.68	0.97
	53.1	2.17	1.15	2.03	18.16	22.37	0.96
	53.62	1.66	0.97	2.07	17.87	22.56	0.97
	53.48	1.48	0.9	1.64	18.67	22.1	0.98
	53.57	1.51	1.06	1.39	17.75	23.17	0.97
	54.19	1	0.84	1.5	18.08	23.65	0.98
	55.54	0.51	0.45	1.12	18.3	25.35	0.97
	52.65	2.06	1.5	2.84	17.34	23.45	0.916		Zaeimnia et al., 2016
	52.51	1.39	1.23	1.71	18.53	23.63	0.951
	54.29	3.26	1.41	1.45	14.91	22.35	0.948
	53.4	1.89	0.64	1.75	19.7	22.19	0.952
	53.56	1.31	0.64	2.03	18.64	24.09	0.942
	56.31	0.82	0.1	1.55	18.5	25.37	0.955
	54.48	2.02	0.44	2.48	18.92	22.59	0.932
	54.85	0.42	0.21	1.3	19.05	24.48	0.963
	50.73	1.5	0.13	6.92	15.49	23.98	0.86		Yadav and Das, 2022
	50.34	1.475	0.148	6.97	15	24.57	0.84
	51.29	1.16	0.08	5.84	15.79	25.68	0.87
	50.27	1.063	0.193	6.39	16.78	24.35	0.92
	54.13	6.05	0.58	3.06	15.3	21.14	0.899		Rogkala et al., 2019
	53.59	6.6	0.45	2.7	13.8	21.42	0.901
	52.78	5.25	0.59	2.61	14.81	23.51	0.91
	54.71	1.74	0.61	2.53	16.49	23.1	0.92
	53.38	4.71	0.93	2.69	15	22.03	0.909
	52.04	6.21	1.06	2.92	13.46	20.61	0.89
	54.66	2.3	0.5	2.28	16.29	23.36	0.927
	53.59	2.6	0.62	2.33	15.88	22.65	0.924
	55.44	1.46	0.41	2.21	16.81	23.04	0.931
	52.18	4.58	1.39	2.06	16.16	22.96	0.933
	52.76	3.47	0.83	2.07	15.99	24.34	0.932
	52.56	3.65	1.35	2.23	16.62	23.14	0.93
	55.44	2.38	0.57	2.12	16.42	23.17	0.93
	52.81	3.23	0.78	1.66	16.07	23.47	0.945
	52.65	3.01	0.88	1.71	18.57	23	0.95		Ngo et al., 2015
	52.45	2.51	1.11	1.45	18.24	23.36	0.957
	52.42	2.25	1.1	1.65	17.88	23.68	0.951
	52.54	2.55	0.98	1.72	17.96	23.15	0.949
	52.64	3.12	0.89	1.54	18.27	23.12	0.955
	51.84	2.81	0.75	1.75	18.14	23.87	0.949
	52.53	2.51	0.9	1.82	18.45	23.51	0.948
	52.42	2.54	0.84	1.64	17.84	23.52	0.951
	52.53	2.61	0.78	1.45	18.08	23.25	0.957
	52.54	2.26	0.88	1.45	18.25	23.24	0.957
	54.7	0.7	0.3	1.8	17.7	23.9	0.945		Xiong et al., 2018
	54.9	0.8	0.5	1.9	18	23.5	0.943
	53.8	0.9	0.4	2	17.8	24.3	0.94
	53.4	0.8	0.5	1.7	17.7	25	0.95
	53.7	0.9	0.5	1.8	17.7	25.1	0.947
	54	0.7	0.1	1.4	17	25.9	0.956
	51.7	2.9	1.1	2.4	15.9	25.2	0.923
	51.9	2.4	0.8	2.2	16	25.6	0.93
	52.4	1.9	0.6	1.9	16.2	26.2	0.939
	53.7	1	0.1	1.5	16.8	25.8	0.952
	52.09	2.9	1.28	3.44	17.41	21.79	0.9		Bağcı et al., 2005
	53.55	1.23	0.77	2.67	17	23.54	0.919
	52.74	2	0.27	5.61	17.99	20.04	0.85
	52.71	2.04	0.36	5.68	18	20.11	0.85
	52.46	2.61	1.22	3.49	18.43	21.25	0.9
	51.83	2.82	0.97	3.58	16.63	24.06	0.98		Rahmani et al., 2017
	53.01	2.69	0.84	2.67	18.39	22.57	0.97
	51.94	3.05	0.77	2.79	17.75	22.42	0.96
	51.97	2.24	0.29	4.39	17.2	23.43	0.97
	52.76	2.3	0.08	4.4	18.32	21.59	0.94
	53.37	1.44	0.14	3.47	18.18	21.75	0.91
